# Supplementary material for: A biomass-derived safe medium to replace toxic dipolar solvents and access cleaner Heck coupling reactions
Source: Royal Society of Chemistry journal article supplement (doi:10.1039/c4gc01677g), 2014-09-04

## ELECTRONIC SUPPORTING INFORMATION

### Biomass-derived safer medium to replace toxic dipolar solvents and access cleaner Heck coupling

G. Strappaveccia,<sup>a</sup> Ermal Ismalaj,<sup>a</sup> C. Petrucci,<sup>a</sup> D. Lanari,<sup>b</sup> A. Marrocchi,<sup>a</sup> Martin Drees,<sup>c</sup> A. Facchetti,<sup>\*c,d</sup> and L. Vaccaro<sup>\*a</sup>

<sup>a</sup>Laboratory of Green Synthetic Organic Chemistry, CEMIN – Dipartimento di Chimica, Università di Perugia Via Elce di Sotto, 8, 06123 Perugia, Italy; Fax: +39 075 5855560; Tel: +39 075 5855541; e-mail: [luigi.vaccaro@unipg.it](mailto:luigi.vaccaro@unipg.it)

<sup>b</sup>Dipartimento di Chimica e Tecnologia del Farmaco, Università di Perugia, Via del Liceo, 06123 Perugia, Italia.

<sup>c</sup>Polyera Corporation, 8045 Lamon Avenue, Skokie, IL 60077 (USA).

<sup>d</sup>Department of Chemistry and the Materials Research Center, Northwestern University, 2145 Sheridan Road, Evanston, IL, 62208. E-mail: [a-facchetti@northwestern.edu](mailto:a-facchetti@northwestern.edu).

## CONTENTS

|                     |                                                                                                                                   |
|---------------------|-----------------------------------------------------------------------------------------------------------------------------------|
| page ESI-2          | Experimental Section                                                                                                              |
| page ESI-3 – ESI 6  | Figures for PPV characterization                                                                                                  |
| page ESI 7 - ESI 26 | Full characterization data ( <sup>1</sup> H NMR, <sup>13</sup> C NMR, EA, GC-EIMS)<br>for Compounds <b>3a-l</b> and <b>5a-h</b> . |
| page ESI-27-ESI-62  | Copies of the <sup>1</sup> H and <sup>13</sup> C NMR for compounds <b>3a-l</b> and <b>5a-h</b> .                                  |

## Experimental Section

Unless otherwise stated, all solvents and reagents were used as obtained from commercial sources without further purification. GLC analyses were performed by using Hewlett-Packard HP 5890A equipped with a capillary column DB-35MS (30 m, 0.53 mm), a FID detector and hydrogen as gas carrier. GC-EIMS analyses were carried out by using a Hewlett-Packard HP 6890N Network GC system/5975 Mass Selective Detector equipped with an electron impact ionizer at 70 eV. NMR spectra were recorded on a Bruker DRX-ADVANCE 400 MHz ( $^1\text{H}$  at 400 MHz and  $^{13}\text{C}$  at 100.6 MHz) in  $\text{CDCl}_3$  using TMS as the internal standard. Elemental Analyses were conducted on a Fisons EA1108CHN. Melting points were measured on a Büchi 510. . ICP-OES 710 Agilent Technology.

### Preparation of the samples for ICP

The compounds (ca. 100 mg) were dissolved in ca. 3 mL of aqua regia and stirred for 10 minutes at room temperature. Water was added to reach a final volume of 10 mL. If present, residual solid was filtered off and the sample was taken to the ICP analyzer.

Compounds **3a**<sup>1</sup>, **3b**<sup>1</sup>, **3c**<sup>2</sup>, **3d**<sup>3</sup>, **3e**<sup>4</sup>, **3f**<sup>3</sup>, **3g**<sup>1</sup>, **3h**<sup>5</sup>, **3i**<sup>6</sup>, **3j**<sup>6</sup>, **3k**<sup>6</sup>, **3l**<sup>6</sup>, **5a**<sup>1</sup>, **5b**<sup>3</sup>, **5c**<sup>7</sup>, **5d**<sup>7</sup>, **5e**<sup>8</sup>, **5f**<sup>9</sup>, **5g**<sup>10</sup>, **5h**<sup>11</sup> are known compounds.

Characterization data and copies of the  $^1\text{H}$  and  $^{13}\text{C}$  NMR are reported below.

## References

1. Z. Zhang, Z. Zha, C. Gan, C. Pan, Y. Zhou, Z. Wang, M-M. Zhou, *J. Org. Chem.*, **2006**, 71, 4339-4342
2. J. M. Concellón, C. Concellón, C. Méjica, *J. Org. Chem.*, **2005**, 70, 6111-6113
3. J. D. Senra, L. F. B. Malta, A. L. F. Souza, L. C. S. Aguiar, O. A. C. Antunes, *Adv. Synth. & Cat.*, **2008**, 350, 2551-2558
4. V. K. Aggarwal, J. R. Fulton, C. G. Sheldon, J. de Vicente, *J. Am. Chem. Soc.*, **2003**, 125, 6034-6035
5. A. Schnyder, T. Aemmer, A. F. Indolese, U. Pittelkow, M. Studer, *Adv. Synth. & Cat.*, **2002**, 344, 495-498
6. T. Fukuyama, M. Arai, H. Matsubara, I. Ryu, *J. Org. Chem.* **2004**, 69, 8105-8107
7. N. Iranpoor, H. Firouzabadi, R. Azadi, *Eur. J. Org. Chem.*, **2007**, 13, 2197-2201
8. P. Liu, Y. Pan, K. Hu, X. Huang, Y. Liang, H. Wang, *Tetrahedron*, **2013**, 69, 7925-7930
9. A. Kamal, V. Srinivasulu, B. N. Seshadri, N. Markandeya, A. Alarifi, N. Shankaraiah, *Green Chem.*, **2012**, 14, 2513-2522
10. W. Prukala, M. Majchrzak, C. Pietraszuk, B. Marciniak, *J. Mol. Cat. A: Chem.*, **2006**, 254, 58-63
11. R. N. Prabhu, R. Ramesh, *Tetrahedron Lett.*, **2012**, 53, 5961-5965

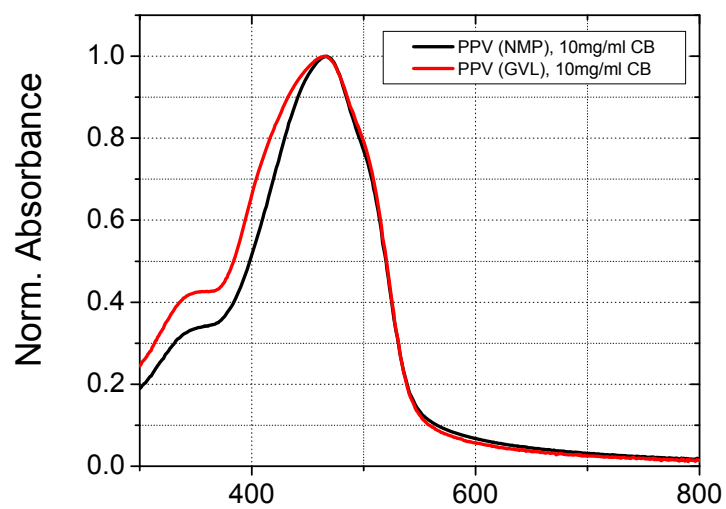

**Figure S1.** Normalized absorption spectra of PPV derivative **1** through NMP-based protocol (black line) and GVL-based protocol (red line) in thin film.

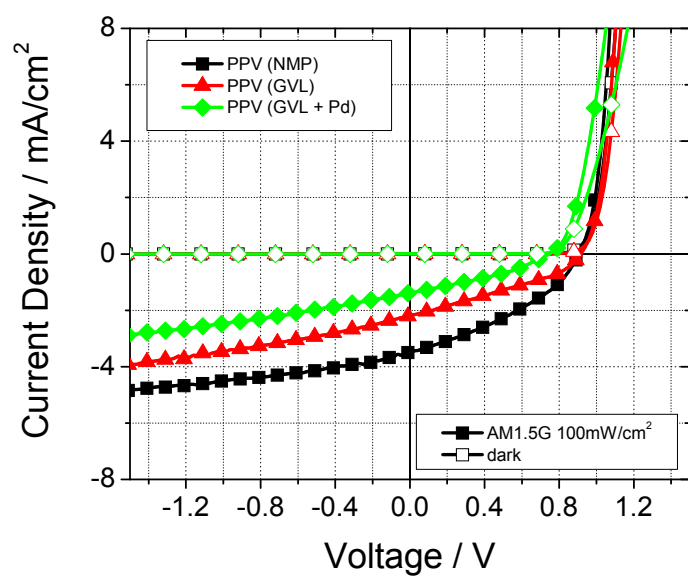

**Figure S2.** J-V characteristics of 1/PCBM based OPVs.

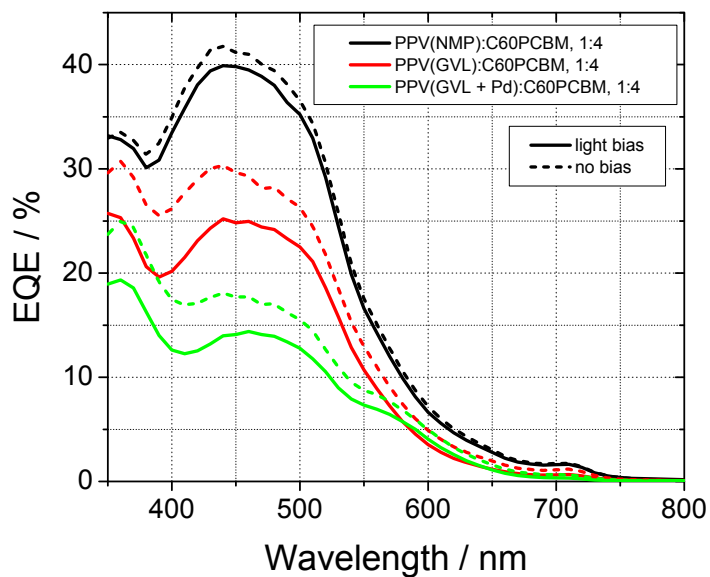

**Figure S3.** EQE spectra of BHJ **1** / PCBM. Black curves represent data using polymer **1** through NMP-based protocol. Red curves represent data using pure **1** through GVL-based protocol, while green curves represent data obtained using contaminated **1** through GVL-based protocol.

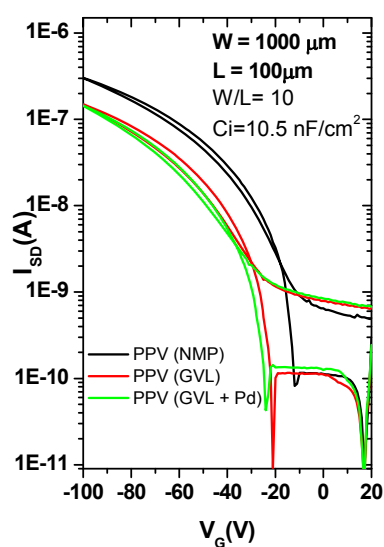

**Figure S4.** Typical transfer plot for spin-coated **1** OFETs. Black curves represent data using polymer **1** through NMP-based protocol. Red curves represent data using pure **1** through GVL-based protocol, while green curves represent data obtained using contaminated **1** through GLV-based protocol.

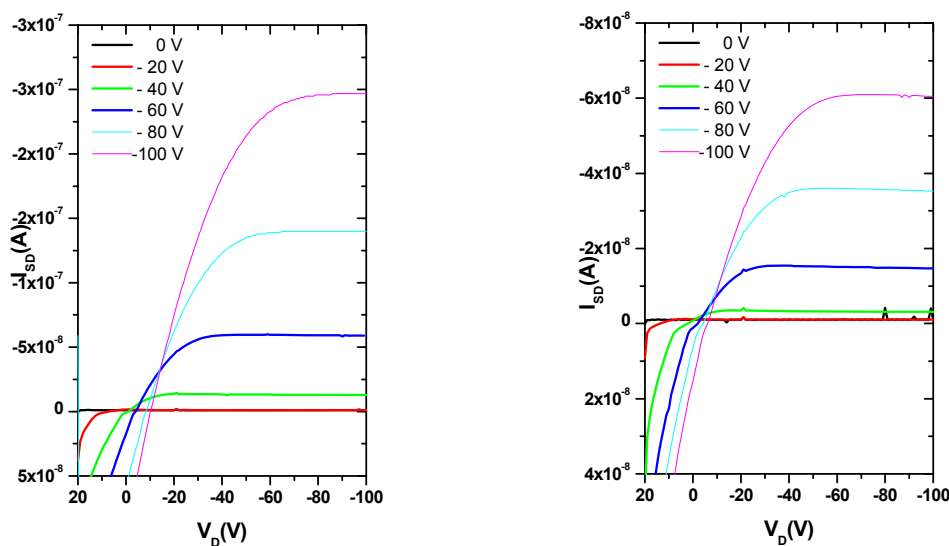

**Figure S5.** Typical output plot for spin-coated **1** OFETs through a) NMP-based and b) GVL based protocol.



|                                                                                                                                                                                                                                                                                                                                                                                                                                                                                                                                                                                                                                                                                                            |                                                     |       |          |            |
|------------------------------------------------------------------------------------------------------------------------------------------------------------------------------------------------------------------------------------------------------------------------------------------------------------------------------------------------------------------------------------------------------------------------------------------------------------------------------------------------------------------------------------------------------------------------------------------------------------------------------------------------------------------------------------------------------------|-----------------------------------------------------|-------|----------|------------|
| Chem. Name                                                                                                                                                                                                                                                                                                                                                                                                                                                                                                                                                                                                                                                                                                 | (E)-methyl 3-(4methoxyphenyl)acrylate ( <b>3b</b> ) |       |          |            |
| Lit. Ref.                                                                                                                                                                                                                                                                                                                                                                                                                                                                                                                                                                                                                                                                                                  | J. Org. Chem., <b>2006</b> , 71, 4339-4342          |       |          |            |
| <div><div><div><div><div>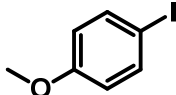</div><div>1b</div></div><div><div></div><div>2a</div></div></div><div><div>+</div><div>1.2 eq.</div></div><div><div><div><div><div></div><div>Pd/C (0.1 mol%), TEA (1 eq.)</div><div>GVL (1M), 150 °C, 2 h</div></div><div></div><div>3b</div></div><div>Molecular Weight: 192</div></div></div></div></div>                              |                                                     |       |          |            |
| METHOD:<br>In a screw capped vial equipped with a magnetic stirrer Pd/C 10 wt% (2.1 mg, 0.002 mmol, 0.1 mol%), GVL (2 mL), 4-iodoanisole ( <b>1b</b> ) (478 mg, 2 mmol), triethylamine (202 mg, 0.279 mL, 2 mmol) and methyl acrylate ( <b>2a</b> ) (207 mg, 0.216 mL, 2.4 mmol) were consecutively added and the resulting mixture was left under stirring at 150 °C. After 2 hours the catalyst was filtered off, 3 mL of water were added and the mixture was cooled down to 0 °C, then the precipitate was filtered off and washed with 1 mL of cold water. Ultimately the obtained solid was dried on high vacuum. In this way <b>3b</b> was obtained as a slightly yellow solid (315 mg, 82% yield). |                                                     |       |          |            |
| Mol Formula                                                                                                                                                                                                                                                                                                                                                                                                                                                                                                                                                                                                                                                                                                | C <sub>11</sub> H <sub>12</sub> O <sub>3</sub>      | m.p.  | 90-91 °C |            |
| Elemental Analysis: Calc.: 68.74; H: 6.29; found: C: 68.82; H: 6.34                                                                                                                                                                                                                                                                                                                                                                                                                                                                                                                                                                                                                                        |                                                     |       |          |            |
| <sup>1</sup> H NMR<br>400 MHz<br>CDCl <sub>3</sub>                                                                                                                                                                                                                                                                                                                                                                                                                                                                                                                                                                                                                                                         | δ value                                             | No. H | Mult.    | j value/Hz |
|                                                                                                                                                                                                                                                                                                                                                                                                                                                                                                                                                                                                                                                                                                            | 3.78                                                | 3     | s        |            |
|                                                                                                                                                                                                                                                                                                                                                                                                                                                                                                                                                                                                                                                                                                            | 3.82                                                | 3     | s        |            |
|                                                                                                                                                                                                                                                                                                                                                                                                                                                                                                                                                                                                                                                                                                            | 6.30                                                | 1     | d        | 16         |
|                                                                                                                                                                                                                                                                                                                                                                                                                                                                                                                                                                                                                                                                                                            | 6.89                                                | 2     | d        | 8.8        |
|                                                                                                                                                                                                                                                                                                                                                                                                                                                                                                                                                                                                                                                                                                            | 7.46                                                | 2     | d        | 8.8        |
|                                                                                                                                                                                                                                                                                                                                                                                                                                                                                                                                                                                                                                                                                                            | 7.64                                                | 1     | d        | 16         |
| <sup>13</sup> C NMR (100.6 MHz, CDCl <sub>3</sub> ) δ : 51.5, 55.3, 114.2, 115.1, 127.0, 130.0, 144.4, 161.2, 167.7                                                                                                                                                                                                                                                                                                                                                                                                                                                                                                                                                                                        |                                                     |       |          |            |
| GC-EIMS (m/z, %): 63 (15), 89 (25), 90 (16), 118 (17), 133 (34), 134 (16), 161 (100), 192 (M <sup>+</sup> , 70)                                                                                                                                                                                                                                                                                                                                                                                                                                                                                                                                                                                            |                                                     |       |          |            |



|                                                                                                                                                                                                                                                                                                                                                                                                                                                                                                                                                                                                                                                                                                |                                                    |       |          |            |
|------------------------------------------------------------------------------------------------------------------------------------------------------------------------------------------------------------------------------------------------------------------------------------------------------------------------------------------------------------------------------------------------------------------------------------------------------------------------------------------------------------------------------------------------------------------------------------------------------------------------------------------------------------------------------------------------|----------------------------------------------------|-------|----------|------------|
| Chem. Name                                                                                                                                                                                                                                                                                                                                                                                                                                                                                                                                                                                                                                                                                     | (E)-ethyl 3-(4methoxyphenyl)acrylate ( <b>3c</b> ) |       |          |            |
| Lit. Ref.                                                                                                                                                                                                                                                                                                                                                                                                                                                                                                                                                                                                                                                                                      | J. Org. Chem., <b>2005</b> , 70, 6111-6113         |       |          |            |
| <div>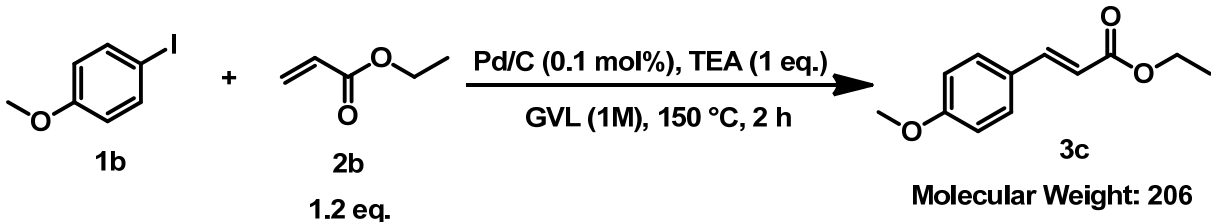</div>                                                                                                                                                                                                                                                                                                                                                                                                                                                                                                                                                                                                  |                                                    |       |          |            |
| METHOD:<br>In a screw capped vial equipped with a magnetic stirrer Pd/C 10 wt% (2.1 mg, 0.002 mmol, 0.1 mol%), GVL (2 mL), 4-iodoanisole ( <b>1b</b> ) (478 mg, 2 mmol), triethylamine (202 mg, 0.279 mL, 2 mmol) and ethyl acrylate ( <b>2b</b> ) (240 mg, 0.264 mL, 2.4 mmol) were consecutively added and the resulting mixture was left under stirring at 150 °C. After 2 hours the catalyst was filtered off, 3 mL of water were added and the mixture was cooled down to 0°C, then the precipitate was filtered off and washed with 1 mL of cold water. Ultimately the obtained solid was dried on high vacuum. In this way <b>3c</b> was obtained as a white solid (371 mg, 90% yield). |                                                    |       |          |            |
| Mol Formula                                                                                                                                                                                                                                                                                                                                                                                                                                                                                                                                                                                                                                                                                    | C <sub>12</sub> H <sub>14</sub> O <sub>3</sub>     | m.p.  | 49 °C    |            |
| Elemental Analysis: Calc.: C: 69.88; H: 6.84; found: C: 69.92; H: 6.78                                                                                                                                                                                                                                                                                                                                                                                                                                                                                                                                                                                                                         |                                                    |       |          |            |
| <sup>1</sup> H NMR<br>400 MHz<br>CDCl <sub>3</sub>                                                                                                                                                                                                                                                                                                                                                                                                                                                                                                                                                                                                                                             | δ value                                            | No. H | Mult.    | j value/Hz |
|                                                                                                                                                                                                                                                                                                                                                                                                                                                                                                                                                                                                                                                                                                | 1.30                                               | 3     | <i>t</i> | 7.0        |
|                                                                                                                                                                                                                                                                                                                                                                                                                                                                                                                                                                                                                                                                                                | 3.79                                               | 3     | <i>s</i> |            |
|                                                                                                                                                                                                                                                                                                                                                                                                                                                                                                                                                                                                                                                                                                | 4.22                                               | 2     | <i>q</i> | 7.2        |
|                                                                                                                                                                                                                                                                                                                                                                                                                                                                                                                                                                                                                                                                                                | 6.86                                               | 2     | <i>d</i> | 8.8        |
|                                                                                                                                                                                                                                                                                                                                                                                                                                                                                                                                                                                                                                                                                                | 7.44                                               | 2     | <i>d</i> | 8.4        |
|                                                                                                                                                                                                                                                                                                                                                                                                                                                                                                                                                                                                                                                                                                | 7.61                                               | 1     | <i>d</i> | 16         |
| <sup>13</sup> C NMR (100.6 MHz, CDCl <sub>3</sub> ) δ : 14.3, 55.2, 60.2, 114.2, 115.6, 127.0, 129.6, 144.1, 161.1, 167.3                                                                                                                                                                                                                                                                                                                                                                                                                                                                                                                                                                      |                                                    |       |          |            |
| GC-EIMS (m/z, %): 63 (15), 89 (24), 90 (18), 118 (17), 133 (36), 134 (16), 161 (100), 192 (M <sup>+</sup> , 71)                                                                                                                                                                                                                                                                                                                                                                                                                                                                                                                                                                                |                                                    |       |          |            |





|                                                                                                                                                                                                                                                                                                                                                                                                                                                                                                                                                                                                                                                                                                          |                                                |       |        |            |
|----------------------------------------------------------------------------------------------------------------------------------------------------------------------------------------------------------------------------------------------------------------------------------------------------------------------------------------------------------------------------------------------------------------------------------------------------------------------------------------------------------------------------------------------------------------------------------------------------------------------------------------------------------------------------------------------------------|------------------------------------------------|-------|--------|------------|
| Chem. Name                                                                                                                                                                                                                                                                                                                                                                                                                                                                                                                                                                                                                                                                                               | (E)-methyl 3-(4-nitrophenyl) acrylate (3f)     |       |        |            |
| Lit. Ref.                                                                                                                                                                                                                                                                                                                                                                                                                                                                                                                                                                                                                                                                                                | Adv. Synth. & Cat., 2008, 350, 2559-2565       |       |        |            |
| <div>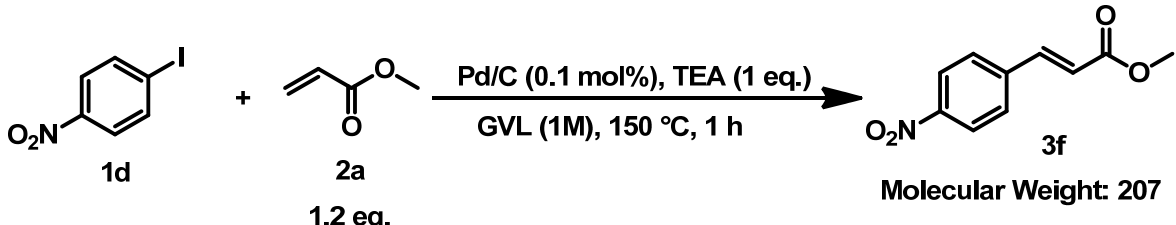</div> <p>Reaction scheme showing the synthesis of (E)-methyl 3-(4-nitrophenyl) acrylate (<b>3f</b>) from 4-iodonitrobenzene (<b>1d</b>) and methyl acrylate (<b>2a</b>). The reaction conditions are Pd/C (0.1 mol%), TEA (1 eq.) in GVL (1M) at 150 °C for 1 h. The product <b>3f</b> has a molecular weight of 207.</p>                                                                                                                                                                                                                                                                                        |                                                |       |        |            |
| METHOD:                                                                                                                                                                                                                                                                                                                                                                                                                                                                                                                                                                                                                                                                                                  |                                                |       |        |            |
| In a screw capped vial equipped with a magnetic stirrer Pd/C 10 wt% (2.1 mg, 0.002 mmol, 0.1 mol%), GVL (2 mL), 4-iodonitrobenzene ( <b>1d</b> ) (508 mg, 2 mmol), triethylamine (202 mg, 0.279 mL, 2 mmol) and methyl acrylate ( <b>2a</b> ) (207 mg, 0.216 mL, 2.4 mmol) were consecutively added and the resulting mixture was left under stirring at 150 °C. After 1 hour hours the catalyst was filtered off, 3 mL of water were added and the mixture was cooled down to 0°C, then the precipitate was filtered off and washed with 1 mL of cold water. Ultimately the obtained solid was dried on high vacuum. In this way <b>3f</b> was obtained as a slightly yellow solid (348 mg, 84% yield). |                                                |       |        |            |
| Mol Formula                                                                                                                                                                                                                                                                                                                                                                                                                                                                                                                                                                                                                                                                                              | C <sub>10</sub> H <sub>9</sub> NO <sub>4</sub> | m.p.  | 161 °C |            |
| Elemental Analysis: Calc.: C: 57.97; H: 4.38; N: 6.76; found: C: 57.91; H: 4.43; N: 6.83                                                                                                                                                                                                                                                                                                                                                                                                                                                                                                                                                                                                                 |                                                |       |        |            |
| <sup>1</sup> H NMR<br>400 MHz<br>CDCl <sub>3</sub>                                                                                                                                                                                                                                                                                                                                                                                                                                                                                                                                                                                                                                                       | δ value                                        | No. H | Mult.  | j value/Hz |
|                                                                                                                                                                                                                                                                                                                                                                                                                                                                                                                                                                                                                                                                                                          | 3.84                                           | 3     | s      |            |
|                                                                                                                                                                                                                                                                                                                                                                                                                                                                                                                                                                                                                                                                                                          | 6.57                                           | 1     | d      | 14.8       |
|                                                                                                                                                                                                                                                                                                                                                                                                                                                                                                                                                                                                                                                                                                          | 7.67-7.74                                      | 3     | m      |            |
|                                                                                                                                                                                                                                                                                                                                                                                                                                                                                                                                                                                                                                                                                                          | 8.27                                           | 2     | d      | 8.8        |
| <sup>13</sup> C NMR (100.6 MHz, CDCl <sub>3</sub> ) δ : 52.2, 122.0, 124.1, 128.6, 140.4, 141.8, 148.4, 166.4                                                                                                                                                                                                                                                                                                                                                                                                                                                                                                                                                                                            |                                                |       |        |            |
| GC-EIMS (m/z, %): 50 (26), 51 (22), 63 (21), 74 (19), 75 (22), 76 (38), 89 (22), 90 (31), 102 (61), 118 (26), 130 (38), 176 (100), 207 (M <sup>+</sup> , 57)                                                                                                                                                                                                                                                                                                                                                                                                                                                                                                                                             |                                                |       |        |            |

|                                                                                                                                                                                                                                                                                                                                                                                                                                                                                                                                                                                                                                                                                                              |                                                 |       |          |            |
|--------------------------------------------------------------------------------------------------------------------------------------------------------------------------------------------------------------------------------------------------------------------------------------------------------------------------------------------------------------------------------------------------------------------------------------------------------------------------------------------------------------------------------------------------------------------------------------------------------------------------------------------------------------------------------------------------------------|-------------------------------------------------|-------|----------|------------|
| Chem. Name                                                                                                                                                                                                                                                                                                                                                                                                                                                                                                                                                                                                                                                                                                   | (E)-ethyl 3-(4-nitrophenyl) acrylate (3g)       |       |          |            |
| Lit. Ref.                                                                                                                                                                                                                                                                                                                                                                                                                                                                                                                                                                                                                                                                                                    | J. Org. Chem., <b>2006</b> , 71, 4339-4342      |       |          |            |
| <div>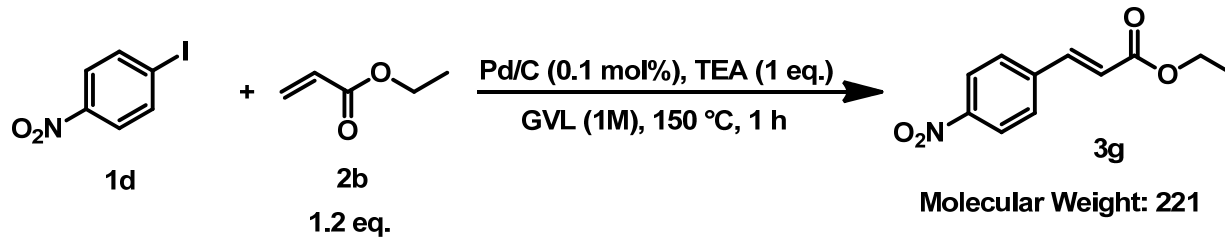<p>1d + 2b (1.2 eq.) <math>\xrightarrow[\text{GVL (1M), 150 }^{\circ}\text{C, 1 h}]{\text{Pd/C (0.1 mol\%), TEA (1 eq.)}}</math> 3g</p><p>Molecular Weight: 221</p></div>                                                                                                                                                                                                                                                                                                                                                                                                                                             |                                                 |       |          |            |
| METHOD:<br>In a screw capped vial equipped with a magnetic stirrer Pd/C 10 wt% (2.1 mg, 0.002 mmol, 0.1 mol%), GVL (2 mL), 4-iodonitrobenzene ( <b>1d</b> ) (508 mg, 2 mmol), triethylamine (202 mg, 0.279 mL, 2 mmol) and ethyl acrylate ( <b>2b</b> ) (240 mg, 0.264 mL, 2.4 mmol) were consecutively added and the resulting mixture was left under stirring at 150 °C. After 1 hour the catalyst was filtered off, 3 mL of water were added and the mixture was cooled down to 0°C, then the precipitate was filtered off and washed with 1 mL of cold water. Ultimately the obtained solid was dried on high vacuum. In this way <b>3g</b> was obtained as a slightly yellow solid (380 mg, 86% yield). |                                                 |       |          |            |
| Mol Formula                                                                                                                                                                                                                                                                                                                                                                                                                                                                                                                                                                                                                                                                                                  | C <sub>11</sub> H <sub>11</sub> NO <sub>4</sub> | m.p.  | 135 °C   |            |
| Elemental Analysis: Calc.: C: 59.73; H: 5.01; N: 6.33; found: C: 59.81; H: 5.10; N: 6.24                                                                                                                                                                                                                                                                                                                                                                                                                                                                                                                                                                                                                     |                                                 |       |          |            |
| <sup>1</sup> H NMR<br>400 MHz<br>CDCl <sub>3</sub>                                                                                                                                                                                                                                                                                                                                                                                                                                                                                                                                                                                                                                                           | δ value                                         | No. H | Mult.    | j value/Hz |
|                                                                                                                                                                                                                                                                                                                                                                                                                                                                                                                                                                                                                                                                                                              | 1.35                                            | 3     | <i>t</i> | 7.0        |
|                                                                                                                                                                                                                                                                                                                                                                                                                                                                                                                                                                                                                                                                                                              | 4.29                                            | 2     | <i>q</i> | 7.0        |
|                                                                                                                                                                                                                                                                                                                                                                                                                                                                                                                                                                                                                                                                                                              | 6.56                                            | 1     | <i>d</i> | 16         |
|                                                                                                                                                                                                                                                                                                                                                                                                                                                                                                                                                                                                                                                                                                              | 7.66-7.72                                       | 3     | <i>m</i> |            |
|                                                                                                                                                                                                                                                                                                                                                                                                                                                                                                                                                                                                                                                                                                              | 8.25                                            | 2     | <i>d</i> | 8.8        |
| <sup>13</sup> C NMR (100.6 MHz, DMSO) δ : 14.5, 60.8, 122.8, 124.3, 129.8, 140.8, 142.2, 148.4, 166.0                                                                                                                                                                                                                                                                                                                                                                                                                                                                                                                                                                                                        |                                                 |       |          |            |
| GC-EIMS (m/z, %): 50 (17), 51 (16), 75 (19), 76 (35), 102 (60), 130 (47), 176 (100), 193 (46), 221 (M <sup>+</sup> , 22)                                                                                                                                                                                                                                                                                                                                                                                                                                                                                                                                                                                     |                                                 |       |          |            |

|            |                                           |
|------------|-------------------------------------------|
| Chem. Name | (E)-butyl 3-(4-nitrophenyl) acrylate (3h) |
| Lit. Ref.  | Adv. Synth.& Cat., 2002, 344, 495-498     |

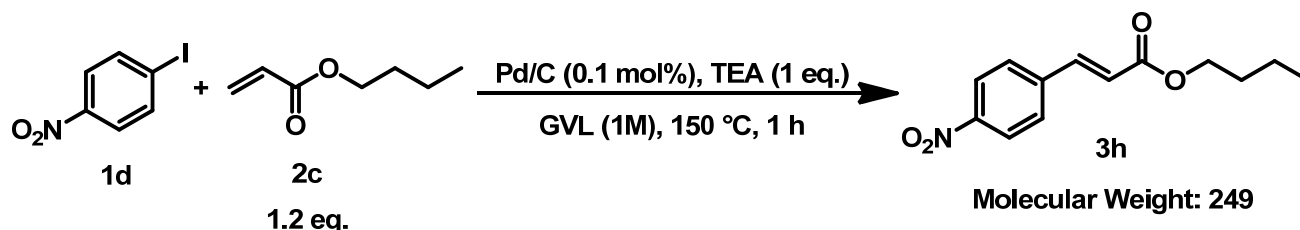

#### METHOD:

In a screw capped vial equipped with a magnetic stirrer Pd/C 10 wt% (2.1 mg, 0.002 mmol, 0.1 mol%), GVL (2 mL), 4-iodonitrobenzene (**1d**) (508 mg, 2 mmol), triethylamine (202 mg, 0.279 mL, 2 mmol) and butyl acrylate (**2c**) (311 mg, 0.348 mL, 2.4 mmol) were consecutively added and the resulting mixture was left under stirring at 150 °C. After 1 hour the catalyst was filtered off, 3 mL of water were added and the mixture was cooled down to 0 °C, then the precipitate was filtered off and washed with 1 mL of cold water. Ultimately the obtained solid was dried on high vacuum. In this way **3h** was obtained as a slightly yellow solid (408 mg, 82% yield).

|             |                                                 |      |          |
|-------------|-------------------------------------------------|------|----------|
| Mol Formula | C <sub>13</sub> H <sub>15</sub> NO <sub>4</sub> | m.p. | 64-65 °C |
|-------------|-------------------------------------------------|------|----------|

**Elemental Analysis:** Calc.: C: 62.64; H: 6.07; N: 5.62; found: C: 62.72; H: 6.12; N: 5.68

| <sup>1</sup> H NMR<br>400 MHz<br>CDCl <sub>3</sub> | δ value   | No. H | Mult.    | j value/Hz |
|----------------------------------------------------|-----------|-------|----------|------------|
|                                                    | 0.939     | 3     | <i>t</i> | 7.4        |
|                                                    | 1.37-1.46 | 2     | <i>m</i> |            |
|                                                    | 1.64-1.71 | 2     | <i>m</i> |            |
|                                                    | 4.21      | 2     | <i>t</i> | 6.6        |
|                                                    | 6.54      | 1     | <i>d</i> | 16         |
|                                                    | 7.64-7.69 | 3     | <i>m</i> |            |
|                                                    | 8.21      | 2     | <i>d</i> | 8.0        |

<sup>13</sup>C NMR (100.6 MHz, DMSO) δ : 14.5, 60.8, 122.8, 124.3, 129.8, 140.8, 142.2, 148.4, 166.0

GC-EIMS (m/z, %): 56 (47), 76 (29), 90 (21), 102 (66), 130 (38), 176 (100), 177 (21), 193 (39), 194 (48)

|                                                                                                                                                                                                                                                                                                                                                                                                                                                                                                                                                                                                                                                                                                   |                                              |       |            |            |
|---------------------------------------------------------------------------------------------------------------------------------------------------------------------------------------------------------------------------------------------------------------------------------------------------------------------------------------------------------------------------------------------------------------------------------------------------------------------------------------------------------------------------------------------------------------------------------------------------------------------------------------------------------------------------------------------------|----------------------------------------------|-------|------------|------------|
| Chem. Name                                                                                                                                                                                                                                                                                                                                                                                                                                                                                                                                                                                                                                                                                        | Cinnamic Acid (3i)                           |       |            |            |
| Lit. Ref.                                                                                                                                                                                                                                                                                                                                                                                                                                                                                                                                                                                                                                                                                         | J. Org. Chem. 2004, 69, 8805-8807            |       |            |            |
| <div><div><div><div><div>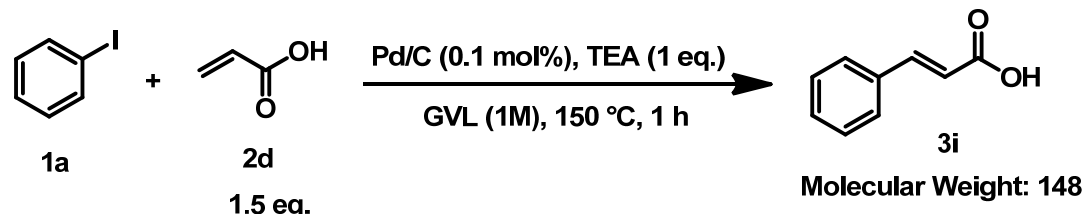</div></div><div><div>1a</div><div>2d</div><div>1.5 eq.</div></div><div><div>3i</div><div>Molecular Weight: 148</div></div></div></div></div>                                                                                                                                                                                                                                                                                                                                                                                                                                          |                                              |       |            |            |
| METHOD:<br>In a screw capped vial equipped with a magnetic stirrer Pd/C 10 wt% (2.1 mg, 0.002 mmol, 0.1 mol%), GVL (2 mL), iodobenzene ( <b>1a</b> ) (416 mg, 0.228 mL, 2 mmol), triethylamine (202 mg, 0.279 mL, 2 mmol) and acrylic acid ( <b>2d</b> ) (216 mg, 0.206 mL, 3 mmol) were consecutively added and the resulting mixture was left under stirring at 150 °C. After 1 hour the catalyst was filtered off, 3 mL of water were added and the mixture was cooled down to 0°C, then the precipitate was filtered off and washed with 1 mL of cold water. Ultimately the obtained solid was dried on high vacuum. In this way <b>3i</b> was obtained as a white solid (249 mg, 84% yield). |                                              |       |            |            |
| Mol Formula                                                                                                                                                                                                                                                                                                                                                                                                                                                                                                                                                                                                                                                                                       | C <sub>9</sub> H <sub>8</sub> O <sub>2</sub> | m.p.  | 132-135 °C |            |
| Elemental Analysis: Calc.: C: 72.96; H: 5.44; found: C: 73.04; H: 5.38                                                                                                                                                                                                                                                                                                                                                                                                                                                                                                                                                                                                                            |                                              |       |            |            |
| <sup>1</sup> H NMR<br>400 MHz<br>CDCl <sub>3</sub>                                                                                                                                                                                                                                                                                                                                                                                                                                                                                                                                                                                                                                                | δ value                                      | No. H | Mult.      | j value/Hz |
|                                                                                                                                                                                                                                                                                                                                                                                                                                                                                                                                                                                                                                                                                                   | 6.57                                         | 1     | <i>d</i>   | 16         |
|                                                                                                                                                                                                                                                                                                                                                                                                                                                                                                                                                                                                                                                                                                   | 7.45-7.46                                    | 3     | <i>m</i>   |            |
|                                                                                                                                                                                                                                                                                                                                                                                                                                                                                                                                                                                                                                                                                                   | 7.63                                         | 1     | <i>d</i>   | 16         |
|                                                                                                                                                                                                                                                                                                                                                                                                                                                                                                                                                                                                                                                                                                   | 7.72-7.74                                    | 2     | <i>m</i>   |            |
| <sup>13</sup> C NMR (100.6 MHz, CDCl <sub>3</sub> ) δ : 117.2, 128.3, 128.9, 130.7, 133.9, 147.0, 128.8, 172.4                                                                                                                                                                                                                                                                                                                                                                                                                                                                                                                                                                                    |                                              |       |            |            |
| GC-EIMS (m/z, %): 43 (22), 45 (21), 50 (29), 51 (45), 77 (65), 91 (37), 102 (40), 103 (66), 131 (32), 147 (100), 148 (67), 207 (M <sup>+</sup> , 15)                                                                                                                                                                                                                                                                                                                                                                                                                                                                                                                                              |                                              |       |            |            |

|                                                                                                                                                                                                                                                                                                                                                                                                                                                                                                                                                                                                                                                                                                    |                                                   |       |            |            |
|----------------------------------------------------------------------------------------------------------------------------------------------------------------------------------------------------------------------------------------------------------------------------------------------------------------------------------------------------------------------------------------------------------------------------------------------------------------------------------------------------------------------------------------------------------------------------------------------------------------------------------------------------------------------------------------------------|---------------------------------------------------|-------|------------|------------|
| Chem. Name                                                                                                                                                                                                                                                                                                                                                                                                                                                                                                                                                                                                                                                                                         | (E)-3-(4-methoxyphenyl)acrylic acid ( <b>3j</b> ) |       |            |            |
| Lit. Ref.                                                                                                                                                                                                                                                                                                                                                                                                                                                                                                                                                                                                                                                                                          | J. Org. Chem., <b>2004</b> , 69, 8805-8807        |       |            |            |
| <div>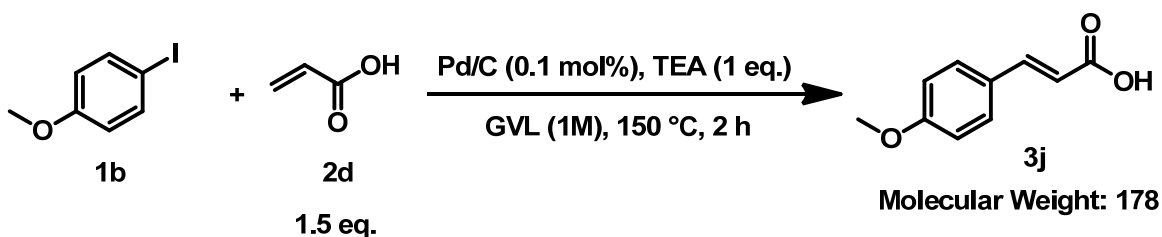</div> <p>Reaction scheme showing the synthesis of <b>3j</b> from <b>1b</b> and <b>2d</b> using Pd/C (0.1 mol%), TEA (1 eq.) in GVL (1M) at 150 °C for 2 h. The molecular weight of <b>3j</b> is 178.</p>                                                                                                                                                                                                                                                                                                                                                                                                   |                                                   |       |            |            |
| <b>METHOD:</b><br>In a screw capped vial equipped with a magnetic stirrer Pd/C 10 wt% (2.1 mg, 0.002 mmol, 0.1 mol%), GVL (2 mL), 4-iodoanisole ( <b>1b</b> ) (478 mg, 2 mmol), triethylamine (202 mg, 0.279 mL, 2 mmol) and acrylic acid ( <b>2d</b> ) (216 mg, 0.206 mL, 3 mmol) were consecutively added and the resulting mixture was left under stirring at 150 °C. After 2 hours the catalyst was filtered off, 3 mL of water were added and the mixture was cooled down to 0°C, then the precipitate was filtered off and washed with 1 mL of cold water. Ultimately the obtained solid was dried on high vacuum. In this way <b>3j</b> was obtained as a white solid (285 mg, 80 % yield). |                                                   |       |            |            |
| Mol Formula                                                                                                                                                                                                                                                                                                                                                                                                                                                                                                                                                                                                                                                                                        | C <sub>10</sub> H <sub>10</sub> O <sub>3</sub>    | m.p.  | 172-173 °C |            |
| <b>Elemental Analysis:</b> Calc.: C: 67.41; H: 5.66; found: C: 67.34; H: 5.45                                                                                                                                                                                                                                                                                                                                                                                                                                                                                                                                                                                                                      |                                                   |       |            |            |
| <sup>1</sup> H NMR<br>400 MHz<br>DMSO                                                                                                                                                                                                                                                                                                                                                                                                                                                                                                                                                                                                                                                              | δ value                                           | No. H | Mult.      | j value/Hz |
|                                                                                                                                                                                                                                                                                                                                                                                                                                                                                                                                                                                                                                                                                                    | 3.83                                              | 3     | s          |            |
|                                                                                                                                                                                                                                                                                                                                                                                                                                                                                                                                                                                                                                                                                                    | 6.41                                              | 1     | d          | 16         |
|                                                                                                                                                                                                                                                                                                                                                                                                                                                                                                                                                                                                                                                                                                    | 7.01                                              | 2     | d          | 8.4        |
|                                                                                                                                                                                                                                                                                                                                                                                                                                                                                                                                                                                                                                                                                                    | 7.58                                              | 1     | d          | 16         |
|                                                                                                                                                                                                                                                                                                                                                                                                                                                                                                                                                                                                                                                                                                    | 7.68                                              | 2     | d          | 8.4        |
| <sup>13</sup> C NMR (100.6 MHz, DMSO) δ : 55.7, 114.7, 116.8, 127.1, 130.3, 144.1, 161.3, 168.2                                                                                                                                                                                                                                                                                                                                                                                                                                                                                                                                                                                                    |                                                   |       |            |            |
| <b>GC-EIMS (m/z, %):</b> 63 (20), 77 (31), 79 (16), 89 (30), 90 (15), 132 (22), 133 (26), 161 (44), 177 (26), 178 (M <sup>+</sup> , 100)                                                                                                                                                                                                                                                                                                                                                                                                                                                                                                                                                           |                                                   |       |            |            |



|                                                                                                                                                                                                                                                                                                                                                                                                                                                                                                                                                                                                                                                                                                                      |                                                 |       |            |            |
|----------------------------------------------------------------------------------------------------------------------------------------------------------------------------------------------------------------------------------------------------------------------------------------------------------------------------------------------------------------------------------------------------------------------------------------------------------------------------------------------------------------------------------------------------------------------------------------------------------------------------------------------------------------------------------------------------------------------|-------------------------------------------------|-------|------------|------------|
| Chem. Name                                                                                                                                                                                                                                                                                                                                                                                                                                                                                                                                                                                                                                                                                                           | (E)-methyl 3-(4-acetylphenyl) acrylic acid (3k) |       |            |            |
| Lit. Ref.                                                                                                                                                                                                                                                                                                                                                                                                                                                                                                                                                                                                                                                                                                            | J. Org. Chem., <b>2004</b> , 69, 8805-8807      |       |            |            |
| <div>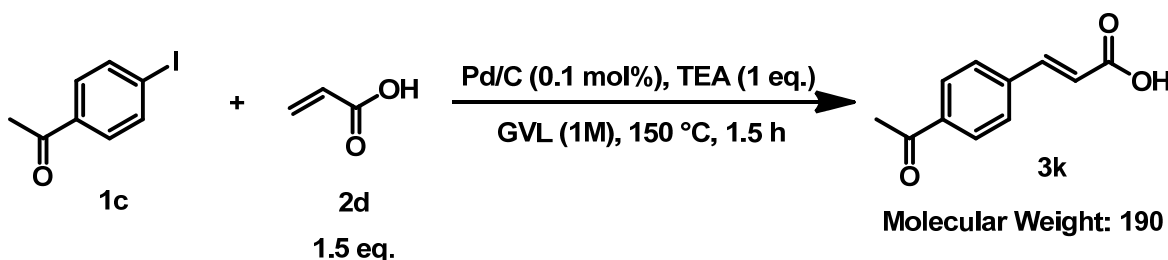</div> <p>1c + 2d (1.5 eq.) <math>\xrightarrow[\text{GVL (1M), 150 }^{\circ}\text{C, 1.5 h}]{\text{Pd/C (0.1 mol\%), TEA (1 eq.)}}</math> 3k</p> <p>Molecular Weight: 190</p>                                                                                                                                                                                                                                                                                                                                                                                                                                                 |                                                 |       |            |            |
| <p><b>METHOD:</b></p> <p>In a screw capped vial equipped with a magnetic stirrer Pd/C 10 wt% (2.1 mg, 0.002 mmol, 0.1 mol%), GVL (2 mL), 4-iodoacetophenone (<b>1c</b>) (502 mg, 2 mmol), triethylamine (202 mg, 0.279 mL, 2 mmol) and acrylic acid (<b>2d</b>) (216 mg, 0.206 mL, 3 mmol) were consecutively added and the resulting mixture was left under stirring at 150 °C. After 1.5 hours the catalyst was filtered off, 3 mL of water were added and the mixture was cooled down to 0°C, then the precipitate was filtered off and washed with 1 mL of cold water. Ultimately the obtained solid was dried on high vacuum. In this way <b>3k</b> was obtained as a yellowish solid (323 mg, 85 % yield).</p> |                                                 |       |            |            |
| Mol Formula                                                                                                                                                                                                                                                                                                                                                                                                                                                                                                                                                                                                                                                                                                          | C <sub>11</sub> H <sub>10</sub> O <sub>3</sub>  | m.p.  | 224-225 °C |            |
| <p><b>Elemental Analysis:</b> Calc.: C: 69.46; H: 5.30; found: C: 69.51; H: 5.22</p>                                                                                                                                                                                                                                                                                                                                                                                                                                                                                                                                                                                                                                 |                                                 |       |            |            |
| <sup>1</sup> H NMR<br>400 MHz<br>DMSO                                                                                                                                                                                                                                                                                                                                                                                                                                                                                                                                                                                                                                                                                | δ value                                         | No. H | Mult.      | j value/Hz |
|                                                                                                                                                                                                                                                                                                                                                                                                                                                                                                                                                                                                                                                                                                                      | 2.59                                            | 3     | s          |            |
|                                                                                                                                                                                                                                                                                                                                                                                                                                                                                                                                                                                                                                                                                                                      | 6.67                                            | 1     | d          | 16         |
|                                                                                                                                                                                                                                                                                                                                                                                                                                                                                                                                                                                                                                                                                                                      | 7.64                                            | 1     | s          | 16         |
|                                                                                                                                                                                                                                                                                                                                                                                                                                                                                                                                                                                                                                                                                                                      | 77.83                                           | 2     | d          | 8          |
|                                                                                                                                                                                                                                                                                                                                                                                                                                                                                                                                                                                                                                                                                                                      | 7.96                                            | 2     | d          | 8.4        |
| <p><b><sup>13</sup>C NMR (100.6 MHz, DMSO) δ :</b> 27.2, 122.1, 128.8, 129.0, 137.9, 138.9, 142.9, 167.7, 197.8</p>                                                                                                                                                                                                                                                                                                                                                                                                                                                                                                                                                                                                  |                                                 |       |            |            |
| <p><b>GC-EIMS (m/z, %):</b> Not performed</p>                                                                                                                                                                                                                                                                                                                                                                                                                                                                                                                                                                                                                                                                        |                                                 |       |            |            |

|                                                                                                                                                                                                                                                                                                                                                                                                                                                                                                                                                                                                                                                                                                                                                                                                                                                                                                                                                                                                                                                                                                                                                                                                                                                                                                                                                                                                                                                                                                                                                                                                                                                                                                                                                                                                                                                                                                                                                                                                                                                                                                                                                                                                                                                                                                                   |                                                  |       |            |                                                                                                                                                                                                                                                                                                                                                                                                                                                                                                                                                                                                                                                                                                    |  |  |  |             |                                               |      |            |                                                                                          |  |  |  |                                       |         |       |       |            |           |   |          |  |           |   |          |  |           |   |          |  |      |   |          |     |      |   |          |     |                                                                                           |  |  |  |                                 |  |  |  |
|-------------------------------------------------------------------------------------------------------------------------------------------------------------------------------------------------------------------------------------------------------------------------------------------------------------------------------------------------------------------------------------------------------------------------------------------------------------------------------------------------------------------------------------------------------------------------------------------------------------------------------------------------------------------------------------------------------------------------------------------------------------------------------------------------------------------------------------------------------------------------------------------------------------------------------------------------------------------------------------------------------------------------------------------------------------------------------------------------------------------------------------------------------------------------------------------------------------------------------------------------------------------------------------------------------------------------------------------------------------------------------------------------------------------------------------------------------------------------------------------------------------------------------------------------------------------------------------------------------------------------------------------------------------------------------------------------------------------------------------------------------------------------------------------------------------------------------------------------------------------------------------------------------------------------------------------------------------------------------------------------------------------------------------------------------------------------------------------------------------------------------------------------------------------------------------------------------------------------------------------------------------------------------------------------------------------|--------------------------------------------------|-------|------------|----------------------------------------------------------------------------------------------------------------------------------------------------------------------------------------------------------------------------------------------------------------------------------------------------------------------------------------------------------------------------------------------------------------------------------------------------------------------------------------------------------------------------------------------------------------------------------------------------------------------------------------------------------------------------------------------------|--|--|--|-------------|-----------------------------------------------|------|------------|------------------------------------------------------------------------------------------|--|--|--|---------------------------------------|---------|-------|-------|------------|-----------|---|----------|--|-----------|---|----------|--|-----------|---|----------|--|------|---|----------|-----|------|---|----------|-----|-------------------------------------------------------------------------------------------|--|--|--|---------------------------------|--|--|--|
| Chem. Name                                                                                                                                                                                                                                                                                                                                                                                                                                                                                                                                                                                                                                                                                                                                                                                                                                                                                                                                                                                                                                                                                                                                                                                                                                                                                                                                                                                                                                                                                                                                                                                                                                                                                                                                                                                                                                                                                                                                                                                                                                                                                                                                                                                                                                                                                                        | (E)-3-(4-nitrophenyl) acrylic acid ( <b>3I</b> ) |       |            |                                                                                                                                                                                                                                                                                                                                                                                                                                                                                                                                                                                                                                                                                                    |  |  |  |             |                                               |      |            |                                                                                          |  |  |  |                                       |         |       |       |            |           |   |          |  |           |   |          |  |           |   |          |  |      |   |          |     |      |   |          |     |                                                                                           |  |  |  |                                 |  |  |  |
| Lit. Ref.                                                                                                                                                                                                                                                                                                                                                                                                                                                                                                                                                                                                                                                                                                                                                                                                                                                                                                                                                                                                                                                                                                                                                                                                                                                                                                                                                                                                                                                                                                                                                                                                                                                                                                                                                                                                                                                                                                                                                                                                                                                                                                                                                                                                                                                                                                         | J. Org. Chem., <b>2004</b> , 69, 8805-8807       |       |            |                                                                                                                                                                                                                                                                                                                                                                                                                                                                                                                                                                                                                                                                                                    |  |  |  |             |                                               |      |            |                                                                                          |  |  |  |                                       |         |       |       |            |           |   |          |  |           |   |          |  |           |   |          |  |      |   |          |     |      |   |          |     |                                                                                           |  |  |  |                                 |  |  |  |
| <div><div><div><div><div>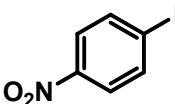</div><div>1d</div></div><div><div></div><div>2d</div></div></div><div><div>+</div><div>1.5 eq.</div></div><div><div><div><div><div></div><div><div>Pd/C (0.1 mol%), TEA (1 eq.)</div><div>GVL (1M), 150 °C, 1 h</div></div></div><div><div></div><div>3I</div></div><div>Molecular Weight: 193</div></div></div></div><tr><td colspan="4">METHOD:<br/>In a screw capped vial equipped with a magnetic stirrer Pd/C 10 wt% (2.1 mg, 0.002 mmol, 0.1 mol%), GVL (2 mL), 4-iodonitrobenzene (<b>1d</b>) (508 mg, 2 mmol), triethylamine (202 mg, 0.279 mL, 2 mmol) and acrylic acid (<b>2d</b>) (216 mg, 0.206 mL, 3 mmol) were consecutively added and the resulting mixture was left under stirring at 150 °C. After 1 hour the catalyst was filtered off, 3 mL of water were added and the mixture was cooled down to 0°C, then the precipitate was filtered off and washed with 1 mL of cold water. Ultimately the obtained solid was dried on high vacuum. In this way <b>3I</b> was obtained as a yellowish solid (320 mg, 83% yield).</td></tr><tr><td>Mol Formula</td><td>C<sub>9</sub>H<sub>7</sub>NO<sub>4</sub></td><td>m.p.</td><td>286-287 °C</td></tr><tr><td colspan="4">Elemental Analysis: Calc.: C: 55.96; H: 3.65; N: 7.25; found: C: 55.89; H: 3.61; N: 7.29</td></tr><tr><td rowspan="6"><sup>1</sup>H NMR<br/>400 MHz<br/>DMSO</td><td>δ value</td><td>No. H</td><td>Mult.</td><td>j value/Hz</td></tr><tr><td>6.76-6.84</td><td>1</td><td><i>m</i></td><td></td></tr><tr><td>7.71-7.77</td><td>1</td><td><i>m</i></td><td></td></tr><tr><td>7.67-7.74</td><td>3</td><td><i>m</i></td><td></td></tr><tr><td>7.97</td><td>2</td><td><i>d</i></td><td>8.4</td></tr><tr><td>8.23</td><td>2</td><td><i>d</i></td><td>8.4</td></tr><tr><td colspan="4"><sup>13</sup>C NMR (100.6 MHz, DMSO) δ : 124.0, 124.3, 129.7, 141.1, 141.7, 148.4, 167.4</td></tr><tr><td colspan="4">GC-EIMS (m/z, %): Not performed</td></tr></div></div> |                                                  |       |            | METHOD:<br>In a screw capped vial equipped with a magnetic stirrer Pd/C 10 wt% (2.1 mg, 0.002 mmol, 0.1 mol%), GVL (2 mL), 4-iodonitrobenzene ( <b>1d</b> ) (508 mg, 2 mmol), triethylamine (202 mg, 0.279 mL, 2 mmol) and acrylic acid ( <b>2d</b> ) (216 mg, 0.206 mL, 3 mmol) were consecutively added and the resulting mixture was left under stirring at 150 °C. After 1 hour the catalyst was filtered off, 3 mL of water were added and the mixture was cooled down to 0°C, then the precipitate was filtered off and washed with 1 mL of cold water. Ultimately the obtained solid was dried on high vacuum. In this way <b>3I</b> was obtained as a yellowish solid (320 mg, 83% yield). |  |  |  | Mol Formula | C <sub>9</sub> H <sub>7</sub> NO <sub>4</sub> | m.p. | 286-287 °C | Elemental Analysis: Calc.: C: 55.96; H: 3.65; N: 7.25; found: C: 55.89; H: 3.61; N: 7.29 |  |  |  | <sup>1</sup> H NMR<br>400 MHz<br>DMSO | δ value | No. H | Mult. | j value/Hz | 6.76-6.84 | 1 | <i>m</i> |  | 7.71-7.77 | 1 | <i>m</i> |  | 7.67-7.74 | 3 | <i>m</i> |  | 7.97 | 2 | <i>d</i> | 8.4 | 8.23 | 2 | <i>d</i> | 8.4 | <sup>13</sup> C NMR (100.6 MHz, DMSO) δ : 124.0, 124.3, 129.7, 141.1, 141.7, 148.4, 167.4 |  |  |  | GC-EIMS (m/z, %): Not performed |  |  |  |
| METHOD:<br>In a screw capped vial equipped with a magnetic stirrer Pd/C 10 wt% (2.1 mg, 0.002 mmol, 0.1 mol%), GVL (2 mL), 4-iodonitrobenzene ( <b>1d</b> ) (508 mg, 2 mmol), triethylamine (202 mg, 0.279 mL, 2 mmol) and acrylic acid ( <b>2d</b> ) (216 mg, 0.206 mL, 3 mmol) were consecutively added and the resulting mixture was left under stirring at 150 °C. After 1 hour the catalyst was filtered off, 3 mL of water were added and the mixture was cooled down to 0°C, then the precipitate was filtered off and washed with 1 mL of cold water. Ultimately the obtained solid was dried on high vacuum. In this way <b>3I</b> was obtained as a yellowish solid (320 mg, 83% yield).                                                                                                                                                                                                                                                                                                                                                                                                                                                                                                                                                                                                                                                                                                                                                                                                                                                                                                                                                                                                                                                                                                                                                                                                                                                                                                                                                                                                                                                                                                                                                                                                                |                                                  |       |            |                                                                                                                                                                                                                                                                                                                                                                                                                                                                                                                                                                                                                                                                                                    |  |  |  |             |                                               |      |            |                                                                                          |  |  |  |                                       |         |       |       |            |           |   |          |  |           |   |          |  |           |   |          |  |      |   |          |     |      |   |          |     |                                                                                           |  |  |  |                                 |  |  |  |
| Mol Formula                                                                                                                                                                                                                                                                                                                                                                                                                                                                                                                                                                                                                                                                                                                                                                                                                                                                                                                                                                                                                                                                                                                                                                                                                                                                                                                                                                                                                                                                                                                                                                                                                                                                                                                                                                                                                                                                                                                                                                                                                                                                                                                                                                                                                                                                                                       | C <sub>9</sub> H <sub>7</sub> NO <sub>4</sub>    | m.p.  | 286-287 °C |                                                                                                                                                                                                                                                                                                                                                                                                                                                                                                                                                                                                                                                                                                    |  |  |  |             |                                               |      |            |                                                                                          |  |  |  |                                       |         |       |       |            |           |   |          |  |           |   |          |  |           |   |          |  |      |   |          |     |      |   |          |     |                                                                                           |  |  |  |                                 |  |  |  |
| Elemental Analysis: Calc.: C: 55.96; H: 3.65; N: 7.25; found: C: 55.89; H: 3.61; N: 7.29                                                                                                                                                                                                                                                                                                                                                                                                                                                                                                                                                                                                                                                                                                                                                                                                                                                                                                                                                                                                                                                                                                                                                                                                                                                                                                                                                                                                                                                                                                                                                                                                                                                                                                                                                                                                                                                                                                                                                                                                                                                                                                                                                                                                                          |                                                  |       |            |                                                                                                                                                                                                                                                                                                                                                                                                                                                                                                                                                                                                                                                                                                    |  |  |  |             |                                               |      |            |                                                                                          |  |  |  |                                       |         |       |       |            |           |   |          |  |           |   |          |  |           |   |          |  |      |   |          |     |      |   |          |     |                                                                                           |  |  |  |                                 |  |  |  |
| <sup>1</sup> H NMR<br>400 MHz<br>DMSO                                                                                                                                                                                                                                                                                                                                                                                                                                                                                                                                                                                                                                                                                                                                                                                                                                                                                                                                                                                                                                                                                                                                                                                                                                                                                                                                                                                                                                                                                                                                                                                                                                                                                                                                                                                                                                                                                                                                                                                                                                                                                                                                                                                                                                                                             | δ value                                          | No. H | Mult.      | j value/Hz                                                                                                                                                                                                                                                                                                                                                                                                                                                                                                                                                                                                                                                                                         |  |  |  |             |                                               |      |            |                                                                                          |  |  |  |                                       |         |       |       |            |           |   |          |  |           |   |          |  |           |   |          |  |      |   |          |     |      |   |          |     |                                                                                           |  |  |  |                                 |  |  |  |
|                                                                                                                                                                                                                                                                                                                                                                                                                                                                                                                                                                                                                                                                                                                                                                                                                                                                                                                                                                                                                                                                                                                                                                                                                                                                                                                                                                                                                                                                                                                                                                                                                                                                                                                                                                                                                                                                                                                                                                                                                                                                                                                                                                                                                                                                                                                   | 6.76-6.84                                        | 1     | <i>m</i>   |                                                                                                                                                                                                                                                                                                                                                                                                                                                                                                                                                                                                                                                                                                    |  |  |  |             |                                               |      |            |                                                                                          |  |  |  |                                       |         |       |       |            |           |   |          |  |           |   |          |  |           |   |          |  |      |   |          |     |      |   |          |     |                                                                                           |  |  |  |                                 |  |  |  |
|                                                                                                                                                                                                                                                                                                                                                                                                                                                                                                                                                                                                                                                                                                                                                                                                                                                                                                                                                                                                                                                                                                                                                                                                                                                                                                                                                                                                                                                                                                                                                                                                                                                                                                                                                                                                                                                                                                                                                                                                                                                                                                                                                                                                                                                                                                                   | 7.71-7.77                                        | 1     | <i>m</i>   |                                                                                                                                                                                                                                                                                                                                                                                                                                                                                                                                                                                                                                                                                                    |  |  |  |             |                                               |      |            |                                                                                          |  |  |  |                                       |         |       |       |            |           |   |          |  |           |   |          |  |           |   |          |  |      |   |          |     |      |   |          |     |                                                                                           |  |  |  |                                 |  |  |  |
|                                                                                                                                                                                                                                                                                                                                                                                                                                                                                                                                                                                                                                                                                                                                                                                                                                                                                                                                                                                                                                                                                                                                                                                                                                                                                                                                                                                                                                                                                                                                                                                                                                                                                                                                                                                                                                                                                                                                                                                                                                                                                                                                                                                                                                                                                                                   | 7.67-7.74                                        | 3     | <i>m</i>   |                                                                                                                                                                                                                                                                                                                                                                                                                                                                                                                                                                                                                                                                                                    |  |  |  |             |                                               |      |            |                                                                                          |  |  |  |                                       |         |       |       |            |           |   |          |  |           |   |          |  |           |   |          |  |      |   |          |     |      |   |          |     |                                                                                           |  |  |  |                                 |  |  |  |
|                                                                                                                                                                                                                                                                                                                                                                                                                                                                                                                                                                                                                                                                                                                                                                                                                                                                                                                                                                                                                                                                                                                                                                                                                                                                                                                                                                                                                                                                                                                                                                                                                                                                                                                                                                                                                                                                                                                                                                                                                                                                                                                                                                                                                                                                                                                   | 7.97                                             | 2     | <i>d</i>   | 8.4                                                                                                                                                                                                                                                                                                                                                                                                                                                                                                                                                                                                                                                                                                |  |  |  |             |                                               |      |            |                                                                                          |  |  |  |                                       |         |       |       |            |           |   |          |  |           |   |          |  |           |   |          |  |      |   |          |     |      |   |          |     |                                                                                           |  |  |  |                                 |  |  |  |
|                                                                                                                                                                                                                                                                                                                                                                                                                                                                                                                                                                                                                                                                                                                                                                                                                                                                                                                                                                                                                                                                                                                                                                                                                                                                                                                                                                                                                                                                                                                                                                                                                                                                                                                                                                                                                                                                                                                                                                                                                                                                                                                                                                                                                                                                                                                   | 8.23                                             | 2     | <i>d</i>   | 8.4                                                                                                                                                                                                                                                                                                                                                                                                                                                                                                                                                                                                                                                                                                |  |  |  |             |                                               |      |            |                                                                                          |  |  |  |                                       |         |       |       |            |           |   |          |  |           |   |          |  |           |   |          |  |      |   |          |     |      |   |          |     |                                                                                           |  |  |  |                                 |  |  |  |
| <sup>13</sup> C NMR (100.6 MHz, DMSO) δ : 124.0, 124.3, 129.7, 141.1, 141.7, 148.4, 167.4                                                                                                                                                                                                                                                                                                                                                                                                                                                                                                                                                                                                                                                                                                                                                                                                                                                                                                                                                                                                                                                                                                                                                                                                                                                                                                                                                                                                                                                                                                                                                                                                                                                                                                                                                                                                                                                                                                                                                                                                                                                                                                                                                                                                                         |                                                  |       |            |                                                                                                                                                                                                                                                                                                                                                                                                                                                                                                                                                                                                                                                                                                    |  |  |  |             |                                               |      |            |                                                                                          |  |  |  |                                       |         |       |       |            |           |   |          |  |           |   |          |  |           |   |          |  |      |   |          |     |      |   |          |     |                                                                                           |  |  |  |                                 |  |  |  |
| GC-EIMS (m/z, %): Not performed                                                                                                                                                                                                                                                                                                                                                                                                                                                                                                                                                                                                                                                                                                                                                                                                                                                                                                                                                                                                                                                                                                                                                                                                                                                                                                                                                                                                                                                                                                                                                                                                                                                                                                                                                                                                                                                                                                                                                                                                                                                                                                                                                                                                                                                                                   |                                                  |       |            |                                                                                                                                                                                                                                                                                                                                                                                                                                                                                                                                                                                                                                                                                                    |  |  |  |             |                                               |      |            |                                                                                          |  |  |  |                                       |         |       |       |            |           |   |          |  |           |   |          |  |           |   |          |  |      |   |          |     |      |   |          |     |                                                                                           |  |  |  |                                 |  |  |  |

|                                                                                                                                                                                                                                                                                                                                                                                                                                                                                                                                                                                                                                                                                                                                            |                                    |       |            |            |
|--------------------------------------------------------------------------------------------------------------------------------------------------------------------------------------------------------------------------------------------------------------------------------------------------------------------------------------------------------------------------------------------------------------------------------------------------------------------------------------------------------------------------------------------------------------------------------------------------------------------------------------------------------------------------------------------------------------------------------------------|------------------------------------|-------|------------|------------|
| Chem. Name                                                                                                                                                                                                                                                                                                                                                                                                                                                                                                                                                                                                                                                                                                                                 | (E)-1,2-diphenylethene (5a)        |       |            |            |
| Lit. Ref.                                                                                                                                                                                                                                                                                                                                                                                                                                                                                                                                                                                                                                                                                                                                  | J. Org. Chem., 2006, 71, 4339-4342 |       |            |            |
| <div>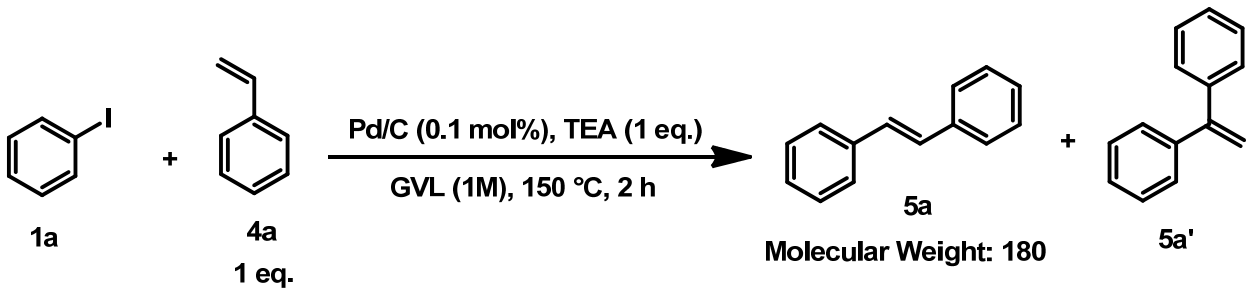<p>1a + 4a (1 eq.) <math>\xrightarrow[\text{GVL (1M), 150 }^{\circ}\text{C, 2 h}]{\text{Pd/C (0.1 mol\%), TEA (1 eq.)}}</math> 5a + 5a'</p><p>Molecular Weight: 180</p></div>                                                                                                                                                                                                                                                                                                                                                                                                                                                                       |                                    |       |            |            |
| <p><b>METHOD:</b></p> <p>In a screw capped vial equipped with a magnetic stirrer Pd/C 10 wt% (2.1 mg, 0.002 mmol, 0.1 mol%), GVL (2 mL), iodobenzene (<b>1a</b>) (416 mg, 0.228 mL, 2 mmol), triethylamine (202 mg, 0.279 mL, 2 mmol) and styrene (<b>4a</b>) (206 mg, 0.228 mL, 2 mmol) were consecutively added and the resulting mixture was left under stirring at 150 °C. After 2 hours the catalyst was filtered off, 3 mL of water were added and the mixture was cooled down to 0°C, then the precipitate was filtered off and washed with 1 mL of cold water. Ultimately the obtained solid was dried on high vacuum. In this way a white solid consisting in a 94:6 mixture of <b>5a</b> and <b>5a'</b> (295 mg, 83% yield).</p> |                                    |       |            |            |
| Mol Formula                                                                                                                                                                                                                                                                                                                                                                                                                                                                                                                                                                                                                                                                                                                                | C <sub>14</sub> H <sub>12</sub>    | m.p.  | 126-127 °C |            |
| <p><b>Elemental Analysis:</b> Calc.: C: 93.29; H: 6.71; found: 93.38; H: 6.61</p>                                                                                                                                                                                                                                                                                                                                                                                                                                                                                                                                                                                                                                                          |                                    |       |            |            |
| <sup>1</sup> H NMR<br>400 MHz<br>CDCl <sub>3</sub>                                                                                                                                                                                                                                                                                                                                                                                                                                                                                                                                                                                                                                                                                         | δ value                            | No. H | Mult.      | J value/Hz |
|                                                                                                                                                                                                                                                                                                                                                                                                                                                                                                                                                                                                                                                                                                                                            | 7.13                               | 2     | s          |            |
|                                                                                                                                                                                                                                                                                                                                                                                                                                                                                                                                                                                                                                                                                                                                            | 7.28-7.30                          | 2     | m          |            |
|                                                                                                                                                                                                                                                                                                                                                                                                                                                                                                                                                                                                                                                                                                                                            | 7.36-7.40                          | 4     | m          |            |
|                                                                                                                                                                                                                                                                                                                                                                                                                                                                                                                                                                                                                                                                                                                                            | 7.53-7.55                          | 4     | m          |            |
| <p><sup>13</sup>C NMR (100.6 MHz, CDCl<sub>3</sub>) δ : 126.6, 127.7, 128.8, 137.4</p>                                                                                                                                                                                                                                                                                                                                                                                                                                                                                                                                                                                                                                                     |                                    |       |            |            |
| <p><b>GC-EIMS (m/z, %):</b> 89 (15), 152 (17), 165 (52), 178 (64), 179 (99), 180 (M<sup>+</sup>, 100), 181 (14)</p>                                                                                                                                                                                                                                                                                                                                                                                                                                                                                                                                                                                                                        |                                    |       |            |            |

|                                                                                                                                                                                                                                                                                                                                                                                                                                                                                                                                                                                                                                                                                                                                                                                              |                                                  |       |        |            |
|----------------------------------------------------------------------------------------------------------------------------------------------------------------------------------------------------------------------------------------------------------------------------------------------------------------------------------------------------------------------------------------------------------------------------------------------------------------------------------------------------------------------------------------------------------------------------------------------------------------------------------------------------------------------------------------------------------------------------------------------------------------------------------------------|--------------------------------------------------|-------|--------|------------|
| Chem. Name                                                                                                                                                                                                                                                                                                                                                                                                                                                                                                                                                                                                                                                                                                                                                                                   | (E)-1-methoxy-4-styrylbenzene ( <b>5b</b> )      |       |        |            |
| Lit. Ref.                                                                                                                                                                                                                                                                                                                                                                                                                                                                                                                                                                                                                                                                                                                                                                                    | Adv. Synth. & Cat., <b>2008</b> , 350, 2551-2558 |       |        |            |
| <div><div><div><div><div>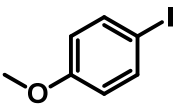</div><div>1b</div></div><div>+</div><div><div><div><div></div><div>4a</div></div><div>1 eq.</div></div></div><div><div><div><div></div></div></div><div><div><div><div></div><div>5b</div></div><div>+</div><div><div><div><div></div><div>5b'</div></div></div></div><div>Molecular Weight: 210</div></div></div></div></div></div></div> |                                                  |       |        |            |
| METHOD:<br>In a screw capped vial equipped with a magnetic stirrer Pd/C 10 wt% (2.1 mg, 0.002 mmol, 0.1 mol%), GVL (2 mL), 4-iodoanisole ( <b>1b</b> ) (478 mg, 2 mmol), triethylamine (202 mg, 0.279 mL, 2 mmol) and styrene ( <b>4a</b> ) (206 mg, 0.228 mL, 2 mmol) were consecutively added and the resulting mixture was left under stirring at 150 °C. After 2.5 hours the catalyst was filtered off, 3 mL of water were added and the mixture was cooled down to 0°C, then the precipitate was filtered off and washed with 1 mL of cold water. Ultimately the obtained solid was dried on high vacuum. In this way a white solid consisting in a 95:5 mixture of <b>5b</b> and <b>5b'</b> (344 mg, 82% yield).                                                                       |                                                  |       |        |            |
| Mol Formula                                                                                                                                                                                                                                                                                                                                                                                                                                                                                                                                                                                                                                                                                                                                                                                  | C <sub>15</sub> H <sub>14</sub>                  | m.p.  | 138 °C |            |
| Elemental Analysis: Calc.: C: 85.68; H: 6.71; found: C: 85.71; H: 6.65                                                                                                                                                                                                                                                                                                                                                                                                                                                                                                                                                                                                                                                                                                                       |                                                  |       |        |            |
| <sup>1</sup> H NMR<br>400 MHz<br>CDCl <sub>3</sub>                                                                                                                                                                                                                                                                                                                                                                                                                                                                                                                                                                                                                                                                                                                                           | δ value                                          | No. H | Mult.  | j value/Hz |
|                                                                                                                                                                                                                                                                                                                                                                                                                                                                                                                                                                                                                                                                                                                                                                                              | 3.84                                             | 3     | s      |            |
|                                                                                                                                                                                                                                                                                                                                                                                                                                                                                                                                                                                                                                                                                                                                                                                              | 6.90-7.09                                        | 4     | m      |            |
|                                                                                                                                                                                                                                                                                                                                                                                                                                                                                                                                                                                                                                                                                                                                                                                              | 7.22-7.24                                        | 2     | m      |            |
|                                                                                                                                                                                                                                                                                                                                                                                                                                                                                                                                                                                                                                                                                                                                                                                              | 7.33-7.37                                        | 2     | m      |            |
|                                                                                                                                                                                                                                                                                                                                                                                                                                                                                                                                                                                                                                                                                                                                                                                              | 7.45-7.50                                        | 4     | m      |            |
| <sup>13</sup> C NMR (100.6 MHz, CDCl <sub>3</sub> ) δ : 55.2, 114.6, 126.2, 126.5, 127.1, 127.6, 128.1, 128.5, 130.1, 137.6, 159.2                                                                                                                                                                                                                                                                                                                                                                                                                                                                                                                                                                                                                                                           |                                                  |       |        |            |
| GC-EIMS (m/z, %): 152 (33), 165 (51), 166 (19), 167 (38), 179 (16), 195 (29), 209 (27), 210 (M <sup>+</sup> , 100), 211 (25)                                                                                                                                                                                                                                                                                                                                                                                                                                                                                                                                                                                                                                                                 |                                                  |       |        |            |

|                                                                                                                                                                                                                                                                                                                                                                                                                                                                                                                                                                                                                                                                                                                             |                                                 |       |            |            |
|-----------------------------------------------------------------------------------------------------------------------------------------------------------------------------------------------------------------------------------------------------------------------------------------------------------------------------------------------------------------------------------------------------------------------------------------------------------------------------------------------------------------------------------------------------------------------------------------------------------------------------------------------------------------------------------------------------------------------------|-------------------------------------------------|-------|------------|------------|
| Chem. Name                                                                                                                                                                                                                                                                                                                                                                                                                                                                                                                                                                                                                                                                                                                  | (E)-1-(4-styrylphenyl) ethanone ( <b>5c</b> )   |       |            |            |
| Lit. Ref.                                                                                                                                                                                                                                                                                                                                                                                                                                                                                                                                                                                                                                                                                                                   | Eur. J. Org. Chem., <b>2007</b> , 13, 2197-2201 |       |            |            |
| <div><div><div><div><div>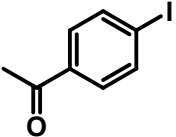</div><div>1c</div></div><div><div></div><div>4a<br/>1 eq.</div></div></div><div><div><div><div></div><div>Molecular Weight: 222</div></div><div><div></div><div>5c</div></div><div><div></div><div>5c'</div></div></div></div></div></div>                                |                                                 |       |            |            |
| METHOD:<br>In a screw capped vial equipped with a magnetic stirrer Pd/C 10 wt% (2.1 mg, 0.002 mmol, 0.1 mol%), GVL (2 mL), 4-iodoacetophenone ( <b>1c</b> ) (502 mg, 2 mmol), triethylamine (202 mg, 0.279 mL, 2 mmol) and styrene ( <b>4a</b> ) (206 mg, 0.228 mL, 2 mmol) were consecutively added and the resulting mixture was left under stirring at 150 °C. After 1.5 hours the catalyst was filtered off, 3 mL of water were added and the mixture was cooled down to 0°C, then the precipitate was filtered off and washed with 1 mL of cold water. Ultimately the obtained solid was dried on high vacuum. In this way a white solid consisting in a 99:1 mixture of <b>5c</b> and <b>5c'</b> (382 mg, 86% yield). |                                                 |       |            |            |
| Mol Formula                                                                                                                                                                                                                                                                                                                                                                                                                                                                                                                                                                                                                                                                                                                 | C <sub>15</sub> H <sub>14</sub>                 | m.p.  | 140-144 °C |            |
| Elemental Analysis: Calc.: C: 86.45; H: 6.35; found: C: 86.39; H: 6.31                                                                                                                                                                                                                                                                                                                                                                                                                                                                                                                                                                                                                                                      |                                                 |       |            |            |
| <sup>1</sup> H NMR<br>400 MHz<br>CDCl <sub>3</sub>                                                                                                                                                                                                                                                                                                                                                                                                                                                                                                                                                                                                                                                                          | δ value                                         | No. H | Mult.      | j value/Hz |
|                                                                                                                                                                                                                                                                                                                                                                                                                                                                                                                                                                                                                                                                                                                             | 2.61                                            | 3     | s          |            |
|                                                                                                                                                                                                                                                                                                                                                                                                                                                                                                                                                                                                                                                                                                                             | 7.12-7.22                                       | 2     | m          |            |
|                                                                                                                                                                                                                                                                                                                                                                                                                                                                                                                                                                                                                                                                                                                             | 7.33-7.29                                       | 1     | m          |            |
|                                                                                                                                                                                                                                                                                                                                                                                                                                                                                                                                                                                                                                                                                                                             | 7.37-7.41                                       | 2     | m          |            |
|                                                                                                                                                                                                                                                                                                                                                                                                                                                                                                                                                                                                                                                                                                                             | 7.54-7.60                                       | 4     | m          |            |
|                                                                                                                                                                                                                                                                                                                                                                                                                                                                                                                                                                                                                                                                                                                             | 7.96                                            | 2     | d          | 8          |
| <sup>13</sup> C NMR (100.6 MHz, CDCl <sub>3</sub> ) δ : 26.6, 126.4, 126.7, 127.3, 128.3, 128.7, 128.8, 131.4, 135.8, 136.6, 141.9, 197.5                                                                                                                                                                                                                                                                                                                                                                                                                                                                                                                                                                                   |                                                 |       |            |            |
| GC-EIMS (m/z, %): 152 (18), 176 (15), 178 (70), 179 (24), 207 (100), 208 (17), 222 (M <sup>+</sup> , 64)                                                                                                                                                                                                                                                                                                                                                                                                                                                                                                                                                                                                                    |                                                 |       |            |            |

|                                                                                                                                                                                                                                                                                                                                                                                                                                                                                                                                                                                                                                                                                                                                        |                                         |       |            |            |
|----------------------------------------------------------------------------------------------------------------------------------------------------------------------------------------------------------------------------------------------------------------------------------------------------------------------------------------------------------------------------------------------------------------------------------------------------------------------------------------------------------------------------------------------------------------------------------------------------------------------------------------------------------------------------------------------------------------------------------------|-----------------------------------------|-------|------------|------------|
| Chem. Name                                                                                                                                                                                                                                                                                                                                                                                                                                                                                                                                                                                                                                                                                                                             | (E)-1-nitro-4-styrylbenzene (5d)        |       |            |            |
| Lit. Ref.                                                                                                                                                                                                                                                                                                                                                                                                                                                                                                                                                                                                                                                                                                                              | Eur. J. Org. Chem., 2007, 13, 2197-2201 |       |            |            |
| 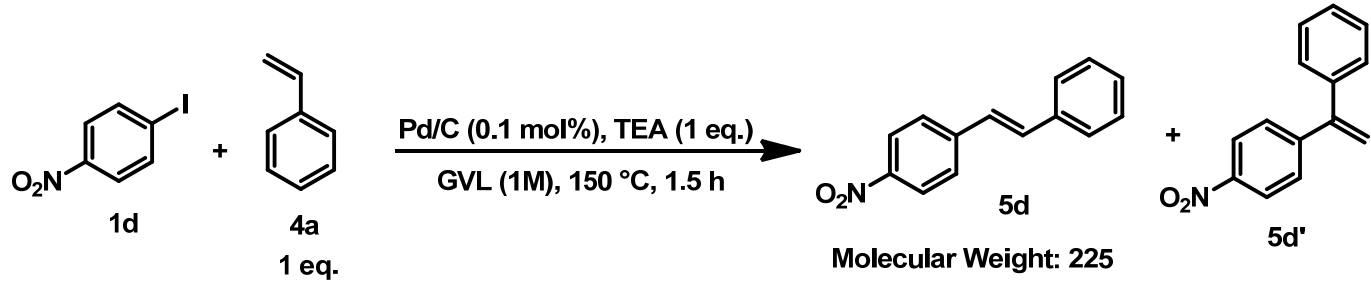                                                                                                                                                                                                                                                                                                                                                                                                                                                                                                                                                                                                                                                     |                                         |       |            |            |
| <b>METHOD:</b><br>In a screw capped vial equipped with a magnetic stirrer Pd/C 10 wt% (2.1 mg, 0.002 mmol, 0.1 mol%), GVL (2 mL), 4-iodonitrobenzene ( <b>1d</b> ) (508 mg, 2 mmol), triethylamine (202 mg, 0.279 mL, 2 mmol) and styrene ( <b>4a</b> ) (206 mg, 0.228 mL, 2 mmol) were consecutively added and the resulting mixture was left under stirring at 150 °C. After 1.5 hours the catalyst was filtered off, 3 mL of water were added and the mixture was cooled down to 0°C, then the precipitate was filtered off and washed with 1 mL of cold water. Ultimately the obtained solid was dried on high vacuum. In this way a yellowish solid consisting in a 99:1 mixture of <b>5d</b> and <b>5d'</b> (378 mg, 84% yield). |                                         |       |            |            |
| Mol Formula                                                                                                                                                                                                                                                                                                                                                                                                                                                                                                                                                                                                                                                                                                                            | C <sub>15</sub> H <sub>14</sub>         | m.p.  | 158-159 °C |            |
| <b>Elemental Analysis:</b> Calc.: C: 74.65; H: 4.92; N: 6.22; found: C: 74.72; H: 4.87; N: 6.28                                                                                                                                                                                                                                                                                                                                                                                                                                                                                                                                                                                                                                        |                                         |       |            |            |
| <sup>1</sup> H NMR<br>400 MHz<br>CDCl <sub>3</sub>                                                                                                                                                                                                                                                                                                                                                                                                                                                                                                                                                                                                                                                                                     | δ value                                 | No. H | Mult.      | j value/Hz |
|                                                                                                                                                                                                                                                                                                                                                                                                                                                                                                                                                                                                                                                                                                                                        | 7.15                                    | 1     | <i>d</i>   | 16.4       |
|                                                                                                                                                                                                                                                                                                                                                                                                                                                                                                                                                                                                                                                                                                                                        | 7.30-7.44                               | 4     | <i>m</i>   |            |
|                                                                                                                                                                                                                                                                                                                                                                                                                                                                                                                                                                                                                                                                                                                                        | 7.56-7.65                               | 4     | <i>m</i>   |            |
|                                                                                                                                                                                                                                                                                                                                                                                                                                                                                                                                                                                                                                                                                                                                        | 8.23                                    | 2     | <i>d</i>   | 8.4        |
| <sup>13</sup> C NMR (100.6 MHz, CDCl <sub>3</sub> ) δ : 124.1, 126.2, 126.8, 127.0, 128.8, 133.2, 136.1, 143.8, 146.6                                                                                                                                                                                                                                                                                                                                                                                                                                                                                                                                                                                                                  |                                         |       |            |            |
| GC-EIMS (m/z, %): 151 (14), 152 (36), 165 (18), 176 (20), 177 (19), 178 (100), 179 (36), 225 (M <sup>+</sup> , 70)                                                                                                                                                                                                                                                                                                                                                                                                                                                                                                                                                                                                                     |                                         |       |            |            |

|                                                                                                                                                                                                                                                                                                                                                                                                                                                                                                                                                                                                                                                                                                                        |                                            |       |        |            |
|------------------------------------------------------------------------------------------------------------------------------------------------------------------------------------------------------------------------------------------------------------------------------------------------------------------------------------------------------------------------------------------------------------------------------------------------------------------------------------------------------------------------------------------------------------------------------------------------------------------------------------------------------------------------------------------------------------------------|--------------------------------------------|-------|--------|------------|
| Chem. Name                                                                                                                                                                                                                                                                                                                                                                                                                                                                                                                                                                                                                                                                                                             | (E)-1-methyl-4-styrylbenzene ( <b>5e</b> ) |       |        |            |
| Lit. Ref.                                                                                                                                                                                                                                                                                                                                                                                                                                                                                                                                                                                                                                                                                                              | Tetrahedron, <b>2013</b> , 69, 7925-7930   |       |        |            |
| <div>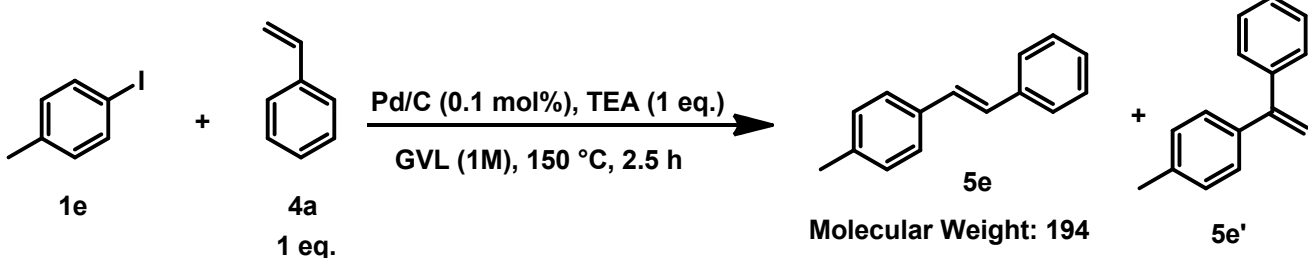</div>                                                                                                                                                                                                                                                                                                                                                                                                                                                                                                                                                                                                                          |                                            |       |        |            |
| METHOD:<br>In a screw capped vial equipped with a magnetic stirrer Pd/C 10 wt% (2.1 mg, 0.002 mmol, 0.1 mol%), GVL (2 mL), 4-iodotoluene ( <b>1e</b> ) (440 mg, 2 mmol), triethylamine (202 mg, 0.279 mL, 2 mmol) and styrene ( <b>4a</b> ) (206 mg, 0.228 mL, 2 mmol) were consecutively added and the resulting mixture was left under stirring at 150 °C. After 2.5 hours the catalyst was filtered off, 3 mL of water were added and the mixture was cooled down to 0°C, then the precipitate was filtered off and washed with 1 mL of cold water. Ultimately the obtained solid was dried on high vacuum. In this way a white solid consisting in a 94:6 mixture of <b>5e</b> and <b>5e'</b> (322 mg, 83% yield). |                                            |       |        |            |
| Mol Formula                                                                                                                                                                                                                                                                                                                                                                                                                                                                                                                                                                                                                                                                                                            | C <sub>15</sub> H <sub>14</sub>            | m.p.  | 124 °C |            |
| Elemental Analysis: Calc.: C: 85.68; H: 6.71; found: C: 85.71; H: 6.65                                                                                                                                                                                                                                                                                                                                                                                                                                                                                                                                                                                                                                                 |                                            |       |        |            |
| <sup>1</sup> H NMR<br>400 MHz<br>CDCl <sub>3</sub>                                                                                                                                                                                                                                                                                                                                                                                                                                                                                                                                                                                                                                                                     | δ value                                    | No. H | Mult.  | j value/Hz |
|                                                                                                                                                                                                                                                                                                                                                                                                                                                                                                                                                                                                                                                                                                                        | 2.36                                       | 3     | s      |            |
|                                                                                                                                                                                                                                                                                                                                                                                                                                                                                                                                                                                                                                                                                                                        | 7.07-7.08                                  | 2     | m      |            |
|                                                                                                                                                                                                                                                                                                                                                                                                                                                                                                                                                                                                                                                                                                                        | 7.16-7.18                                  | 2     | m      |            |
|                                                                                                                                                                                                                                                                                                                                                                                                                                                                                                                                                                                                                                                                                                                        | 7.23-7.25                                  | 1     | m      |            |
|                                                                                                                                                                                                                                                                                                                                                                                                                                                                                                                                                                                                                                                                                                                        | 7.33-7.37                                  | 2     | m      |            |
|                                                                                                                                                                                                                                                                                                                                                                                                                                                                                                                                                                                                                                                                                                                        | 7.41-7.43                                  | 2     | m      |            |
|                                                                                                                                                                                                                                                                                                                                                                                                                                                                                                                                                                                                                                                                                                                        | 7.50-7.52                                  | 2     | m      |            |
| <sup>13</sup> C NMR (100.6 MHz, CDCl <sub>3</sub> ) δ : 21.4, 126.5, 126.6, 127.5, 127.8, 128.7, 128.8, 129.5, 134.6, 137.6, 137.7                                                                                                                                                                                                                                                                                                                                                                                                                                                                                                                                                                                     |                                            |       |        |            |
| GC-EIMS (m/z, %): 89 (12), 115 (23), 152 (15), 165 (18), 178 (82), 179 (100), 180 (16), 193 (19), 194 (M <sup>+</sup> , 94), 195 (19)                                                                                                                                                                                                                                                                                                                                                                                                                                                                                                                                                                                  |                                            |       |        |            |

|                                                                                                                                                                                                                                                                                                                                                                                                                                                                                                                                                                                                                                                                                                                                                                                                                                                                                                                                                                                                                                                                                                                                                                                                                                                                                                                                                                                                                                                                                                                                                                                                                                                                                                                                                                                                                                                                                                                                                                                                                                                                                                                                                                                                                                                                                                                                             |                                    |       |           |            |             |                                    |      |           |                                                    |         |       |       |            |      |   |          |  |           |   |          |  |      |   |          |     |      |   |          |     |
|---------------------------------------------------------------------------------------------------------------------------------------------------------------------------------------------------------------------------------------------------------------------------------------------------------------------------------------------------------------------------------------------------------------------------------------------------------------------------------------------------------------------------------------------------------------------------------------------------------------------------------------------------------------------------------------------------------------------------------------------------------------------------------------------------------------------------------------------------------------------------------------------------------------------------------------------------------------------------------------------------------------------------------------------------------------------------------------------------------------------------------------------------------------------------------------------------------------------------------------------------------------------------------------------------------------------------------------------------------------------------------------------------------------------------------------------------------------------------------------------------------------------------------------------------------------------------------------------------------------------------------------------------------------------------------------------------------------------------------------------------------------------------------------------------------------------------------------------------------------------------------------------------------------------------------------------------------------------------------------------------------------------------------------------------------------------------------------------------------------------------------------------------------------------------------------------------------------------------------------------------------------------------------------------------------------------------------------------|------------------------------------|-------|-----------|------------|-------------|------------------------------------|------|-----------|----------------------------------------------------|---------|-------|-------|------------|------|---|----------|--|-----------|---|----------|--|------|---|----------|-----|------|---|----------|-----|
| Chem. Name                                                                                                                                                                                                                                                                                                                                                                                                                                                                                                                                                                                                                                                                                                                                                                                                                                                                                                                                                                                                                                                                                                                                                                                                                                                                                                                                                                                                                                                                                                                                                                                                                                                                                                                                                                                                                                                                                                                                                                                                                                                                                                                                                                                                                                                                                                                                  | (E)-1-chloro-4-styrylbenzene (5f)  |       |           |            |             |                                    |      |           |                                                    |         |       |       |            |      |   |          |  |           |   |          |  |      |   |          |     |      |   |          |     |
| Lit. Ref.                                                                                                                                                                                                                                                                                                                                                                                                                                                                                                                                                                                                                                                                                                                                                                                                                                                                                                                                                                                                                                                                                                                                                                                                                                                                                                                                                                                                                                                                                                                                                                                                                                                                                                                                                                                                                                                                                                                                                                                                                                                                                                                                                                                                                                                                                                                                   | Green Chem., 2012, 14, 2513-2522   |       |           |            |             |                                    |      |           |                                                    |         |       |       |            |      |   |          |  |           |   |          |  |      |   |          |     |      |   |          |     |
| <div><div><div><div><div>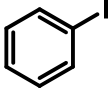</div><div>1a</div></div><div><div></div><div>4b</div></div></div><div>+</div><div><div><div><div></div><div>Molecular Weight: 214</div></div><div><div></div><div>5f</div></div><div>+</div><div><div></div><div>5f'</div></div></div></div><p>METHOD:</p><p>In a screw capped vial equipped with a magnetic stirrer Pd/C 10 wt% (2.1 mg, 0.002 mmol, 0.1 mol%), GVL (2 mL), iodobenzene (<b>1a</b>) (416 mg, 0.228 mL, 2 mmol), triethylamine (202 mg, 0.279 mL, 2 mmol) and 4-chlorostyrene (<b>4b</b>) (286 mg, 0.247 mL, 2.4 mmol) were consecutively added and the resulting mixture was left under stirring at 150 °C. After 2 hours the catalyst was filtered off, 3 mL of water were added and the mixture was cooled down to 0°C, then the precipitate was filtered off and washed with 1 mL of cold water. Ultimately the obtained solid was dried on high vacuum. In this a white solid consisting in a 92:8 mixture of <b>5f</b> and <b>5f'</b> (385 mg, 90% yield).</p><table><tr><td>Mol Formula</td><td>C<sub>14</sub>H<sub>11</sub>Cl</td><td>m.p.</td><td>127-129°C</td></tr></table><p>Elemental Analysis: Calc.: C: 78.32; H: 5.16; found: 78.64; H: 5.08.</p><table><tr><td rowspan="5"><sup>1</sup>H NMR<br/>400 MHz<br/>CDCl<sub>3</sub></td><td>δ value</td><td>No. H</td><td>Mult.</td><td>J value/Hz</td></tr><tr><td>7.07</td><td>2</td><td><i>m</i></td><td></td></tr><tr><td>7.26-7.39</td><td>5</td><td><i>m</i></td><td></td></tr><tr><td>7.44</td><td>2</td><td><i>d</i></td><td>8.4</td></tr><tr><td>7.51</td><td>2</td><td><i>d</i></td><td>7.6</td></tr></table><p><sup>13</sup>C NMR (100.6 MHz, CDCl<sub>3</sub>) δ : 126.7, 127.5, 127.8, 128.0, 128.9, 129.0, 129.4, 133.3, 135.9, 137.1</p><p>GC-EIMS (m/z, %): 50 (17), 51 (21), 63 (18), 75 (20), 76 (27), 89 (24), 152 (17), 176 (24), 178 (100), 179 (94), 214 (70), 216 (23).</p></div></div> |                                    |       |           |            | Mol Formula | C <sub>14</sub> H <sub>11</sub> Cl | m.p. | 127-129°C | <sup>1</sup> H NMR<br>400 MHz<br>CDCl <sub>3</sub> | δ value | No. H | Mult. | J value/Hz | 7.07 | 2 | <i>m</i> |  | 7.26-7.39 | 5 | <i>m</i> |  | 7.44 | 2 | <i>d</i> | 8.4 | 7.51 | 2 | <i>d</i> | 7.6 |
| Mol Formula                                                                                                                                                                                                                                                                                                                                                                                                                                                                                                                                                                                                                                                                                                                                                                                                                                                                                                                                                                                                                                                                                                                                                                                                                                                                                                                                                                                                                                                                                                                                                                                                                                                                                                                                                                                                                                                                                                                                                                                                                                                                                                                                                                                                                                                                                                                                 | C <sub>14</sub> H <sub>11</sub> Cl | m.p.  | 127-129°C |            |             |                                    |      |           |                                                    |         |       |       |            |      |   |          |  |           |   |          |  |      |   |          |     |      |   |          |     |
| <sup>1</sup> H NMR<br>400 MHz<br>CDCl <sub>3</sub>                                                                                                                                                                                                                                                                                                                                                                                                                                                                                                                                                                                                                                                                                                                                                                                                                                                                                                                                                                                                                                                                                                                                                                                                                                                                                                                                                                                                                                                                                                                                                                                                                                                                                                                                                                                                                                                                                                                                                                                                                                                                                                                                                                                                                                                                                          | δ value                            | No. H | Mult.     | J value/Hz |             |                                    |      |           |                                                    |         |       |       |            |      |   |          |  |           |   |          |  |      |   |          |     |      |   |          |     |
|                                                                                                                                                                                                                                                                                                                                                                                                                                                                                                                                                                                                                                                                                                                                                                                                                                                                                                                                                                                                                                                                                                                                                                                                                                                                                                                                                                                                                                                                                                                                                                                                                                                                                                                                                                                                                                                                                                                                                                                                                                                                                                                                                                                                                                                                                                                                             | 7.07                               | 2     | <i>m</i>  |            |             |                                    |      |           |                                                    |         |       |       |            |      |   |          |  |           |   |          |  |      |   |          |     |      |   |          |     |
|                                                                                                                                                                                                                                                                                                                                                                                                                                                                                                                                                                                                                                                                                                                                                                                                                                                                                                                                                                                                                                                                                                                                                                                                                                                                                                                                                                                                                                                                                                                                                                                                                                                                                                                                                                                                                                                                                                                                                                                                                                                                                                                                                                                                                                                                                                                                             | 7.26-7.39                          | 5     | <i>m</i>  |            |             |                                    |      |           |                                                    |         |       |       |            |      |   |          |  |           |   |          |  |      |   |          |     |      |   |          |     |
|                                                                                                                                                                                                                                                                                                                                                                                                                                                                                                                                                                                                                                                                                                                                                                                                                                                                                                                                                                                                                                                                                                                                                                                                                                                                                                                                                                                                                                                                                                                                                                                                                                                                                                                                                                                                                                                                                                                                                                                                                                                                                                                                                                                                                                                                                                                                             | 7.44                               | 2     | <i>d</i>  | 8.4        |             |                                    |      |           |                                                    |         |       |       |            |      |   |          |  |           |   |          |  |      |   |          |     |      |   |          |     |
|                                                                                                                                                                                                                                                                                                                                                                                                                                                                                                                                                                                                                                                                                                                                                                                                                                                                                                                                                                                                                                                                                                                                                                                                                                                                                                                                                                                                                                                                                                                                                                                                                                                                                                                                                                                                                                                                                                                                                                                                                                                                                                                                                                                                                                                                                                                                             | 7.51                               | 2     | <i>d</i>  | 7.6        |             |                                    |      |           |                                                    |         |       |       |            |      |   |          |  |           |   |          |  |      |   |          |     |      |   |          |     |



|                                                                                                                                                                                                                                                                                                                                                                                                                                                                                                                                                                                                                                                                                                                                |                                                       |       |           |            |
|--------------------------------------------------------------------------------------------------------------------------------------------------------------------------------------------------------------------------------------------------------------------------------------------------------------------------------------------------------------------------------------------------------------------------------------------------------------------------------------------------------------------------------------------------------------------------------------------------------------------------------------------------------------------------------------------------------------------------------|-------------------------------------------------------|-------|-----------|------------|
| Chem. Name                                                                                                                                                                                                                                                                                                                                                                                                                                                                                                                                                                                                                                                                                                                     | (E)-1-chloro-4-(4-methoxystyryl)benzene ( <b>5g</b> ) |       |           |            |
| Lit. Ref.                                                                                                                                                                                                                                                                                                                                                                                                                                                                                                                                                                                                                                                                                                                      | J. Mol. Cat. A: Chem., <b>2006</b> , 254, 58-63       |       |           |            |
| <div><div><div><div><div>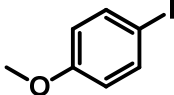</div><div>1b</div></div><div><div></div><div>4b<br/>1 eq.</div></div><div><div><div><div></div><div><div><div><div></div><div>5g</div></div><div><div></div><div>5g'</div></div></div><div>Molecular Weight: 245</div></div></div></div></div></div></div></div>             |                                                       |       |           |            |
| METHOD:<br>In a screw capped vial equipped with a magnetic stirrer Pd/C 10 wt% (2.1 mg, 0.002 mmol, 0.1 mol%), GVL (2 mL), 4-iodoanisole ( <b>1b</b> ) (478 mg, 2 mmol), triethylamine (202 mg, 0.279 mL, 2 mmol) and 4-chlorostyrene ( <b>4b</b> ) (286 mg, 0.247 mL, 2.4 mmol) were consecutively added and the resulting mixture was left under stirring at 150 °C. After 2.5 hours the catalyst was filtered off, 3 mL of water were added and the mixture was cooled down to 0°C, then the precipitate was filtered off and washed with 1 mL of cold water. Ultimately the obtained solid was dried on high vacuum. In this a white solid consisting in a 90:10 mixture of <b>5g</b> and <b>5g'</b> ( 441 mg, 90% yield). |                                                       |       |           |            |
| Mol Formula                                                                                                                                                                                                                                                                                                                                                                                                                                                                                                                                                                                                                                                                                                                    | C <sub>15</sub> H <sub>13</sub> ClO                   | m.p.  | 193-194°C |            |
| Elemental Analysis: Calc.: C: 73.62; H: 5.35; found: 74.01; H: 5.37.                                                                                                                                                                                                                                                                                                                                                                                                                                                                                                                                                                                                                                                           |                                                       |       |           |            |
| <sup>1</sup> H NMR<br>400 MHz<br>CDCl <sub>3</sub>                                                                                                                                                                                                                                                                                                                                                                                                                                                                                                                                                                                                                                                                             | δ value                                               | No. H | Mult.     | J value/Hz |
|                                                                                                                                                                                                                                                                                                                                                                                                                                                                                                                                                                                                                                                                                                                                | 3.84                                                  | 3     | s         |            |
|                                                                                                                                                                                                                                                                                                                                                                                                                                                                                                                                                                                                                                                                                                                                | 6.89-6.94                                             | 3     | m         |            |
|                                                                                                                                                                                                                                                                                                                                                                                                                                                                                                                                                                                                                                                                                                                                | 7.03                                                  | 1     | d         | 16.4       |
|                                                                                                                                                                                                                                                                                                                                                                                                                                                                                                                                                                                                                                                                                                                                | 7.30-7.32                                             | 2     | m         |            |
|                                                                                                                                                                                                                                                                                                                                                                                                                                                                                                                                                                                                                                                                                                                                | 7.40-7.46                                             | 4     | m         |            |
| <sup>13</sup> C NMR (100.6 MHz, CDCl <sub>3</sub> ) δ : 55.4, 114.3, 125.3, 127.5, 127.9, 128.9, 129.8, 132.8, 136.2, 159.5                                                                                                                                                                                                                                                                                                                                                                                                                                                                                                                                                                                                    |                                                       |       |           |            |
| GC-EIMS (m/z, %): 165 (91), 166 (54), 229 (20), 244 (100), 245 (17), 246 (34)                                                                                                                                                                                                                                                                                                                                                                                                                                                                                                                                                                                                                                                  |                                                       |       |           |            |

|                                                                                                                                                                                                                                                                                                                                                                                                                                                                                                                                                                                                                                                                                                                                   |                                               |       |       |            |
|-----------------------------------------------------------------------------------------------------------------------------------------------------------------------------------------------------------------------------------------------------------------------------------------------------------------------------------------------------------------------------------------------------------------------------------------------------------------------------------------------------------------------------------------------------------------------------------------------------------------------------------------------------------------------------------------------------------------------------------|-----------------------------------------------|-------|-------|------------|
| Chem. Name                                                                                                                                                                                                                                                                                                                                                                                                                                                                                                                                                                                                                                                                                                                        | (E)-1-(4-(4-chlorostyryl)phenyl)ethanone (5h) |       |       |            |
| Lit. Ref.                                                                                                                                                                                                                                                                                                                                                                                                                                                                                                                                                                                                                                                                                                                         | Tetrahedron Lett., 2012, 53, 5961-5965        |       |       |            |
| <div><div><div><div><div><div>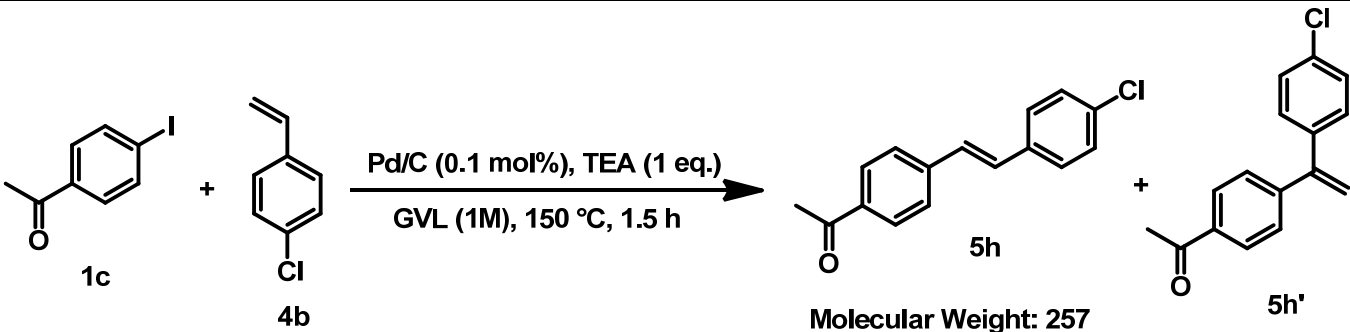</div></div></div><div><div>1c</div><div>4b</div><div>5h</div><div>5h'</div><div>Molecular Weight: 257</div></div></div></div></div>                                                                                                                                                                                                                                                                                                                                                                                                                                                                              |                                               |       |       |            |
| METHOD:<br>In a screw capped vial equipped with a magnetic stirrer Pd/C 10 wt% (2.1 mg, 0.002 mmol, 0.1 mol%), GVL (2 mL), 4-iodoacetophenone ( <b>1c</b> ) (502 mg, 2 mmol), triethylamine (202 mg, 0.279 mL, 2 mmol) and 4-chlorostyrene ( <b>4b</b> ) (286 mg, 0.247 mL, 2.4 mmol) were consecutively added and the resulting mixture was left under stirring at 150 °C. After 1.5 hours the catalyst was filtered off, 3 mL of water were added and the mixture was cooled down to 0°C, then the precipitate was filtered off and washed with 1 mL of cold water. Ultimately the obtained solid was dried on high vacuum. In this a white solid consisting in a 97:3 mixture of <b>5h</b> and <b>5h'</b> (437 mg, 85% yield). |                                               |       |       |            |
| Mol Formula                                                                                                                                                                                                                                                                                                                                                                                                                                                                                                                                                                                                                                                                                                                       | C <sub>16</sub> H <sub>13</sub> ClO           |       | m.p.  |            |
| Elemental Analysis: Calc.: C: 74.85; H: 5.10; found: 75.03; H: 5.12.                                                                                                                                                                                                                                                                                                                                                                                                                                                                                                                                                                                                                                                              |                                               |       |       |            |
| <sup>1</sup> H NMR<br>400 MHz<br>CDCl <sub>3</sub>                                                                                                                                                                                                                                                                                                                                                                                                                                                                                                                                                                                                                                                                                | δ value                                       | No. H | Mult. | J value/Hz |
|                                                                                                                                                                                                                                                                                                                                                                                                                                                                                                                                                                                                                                                                                                                                   | 2.61                                          | 3     | s     |            |
|                                                                                                                                                                                                                                                                                                                                                                                                                                                                                                                                                                                                                                                                                                                                   | 7.07-7.19                                     | 2     | m     |            |
|                                                                                                                                                                                                                                                                                                                                                                                                                                                                                                                                                                                                                                                                                                                                   | 7.34                                          | 2     | d     | 8.4        |
|                                                                                                                                                                                                                                                                                                                                                                                                                                                                                                                                                                                                                                                                                                                                   | 7.46                                          | 2     | d     | 8.4        |
|                                                                                                                                                                                                                                                                                                                                                                                                                                                                                                                                                                                                                                                                                                                                   | 7.57                                          | 2     | d     | 8.4        |
|                                                                                                                                                                                                                                                                                                                                                                                                                                                                                                                                                                                                                                                                                                                                   | 7.95                                          | 2     | d     | 8.4        |
| <sup>13</sup> C NMR (100.6 MHz, CDCl <sub>3</sub> ) δ : 26.7, 126.6, 128.0, 128.1, 129.0, 129.1, 130.2, 134.0, 135.3, 136.2, 141.7                                                                                                                                                                                                                                                                                                                                                                                                                                                                                                                                                                                                |                                               |       |       |            |
| GC-EIMS (m/z, %): 43 (25), 176 (29), 177 (18), 178 (56), 241 (100), 243 (36), 256 (74), 258 (24).                                                                                                                                                                                                                                                                                                                                                                                                                                                                                                                                                                                                                                 |                                               |       |       |            |

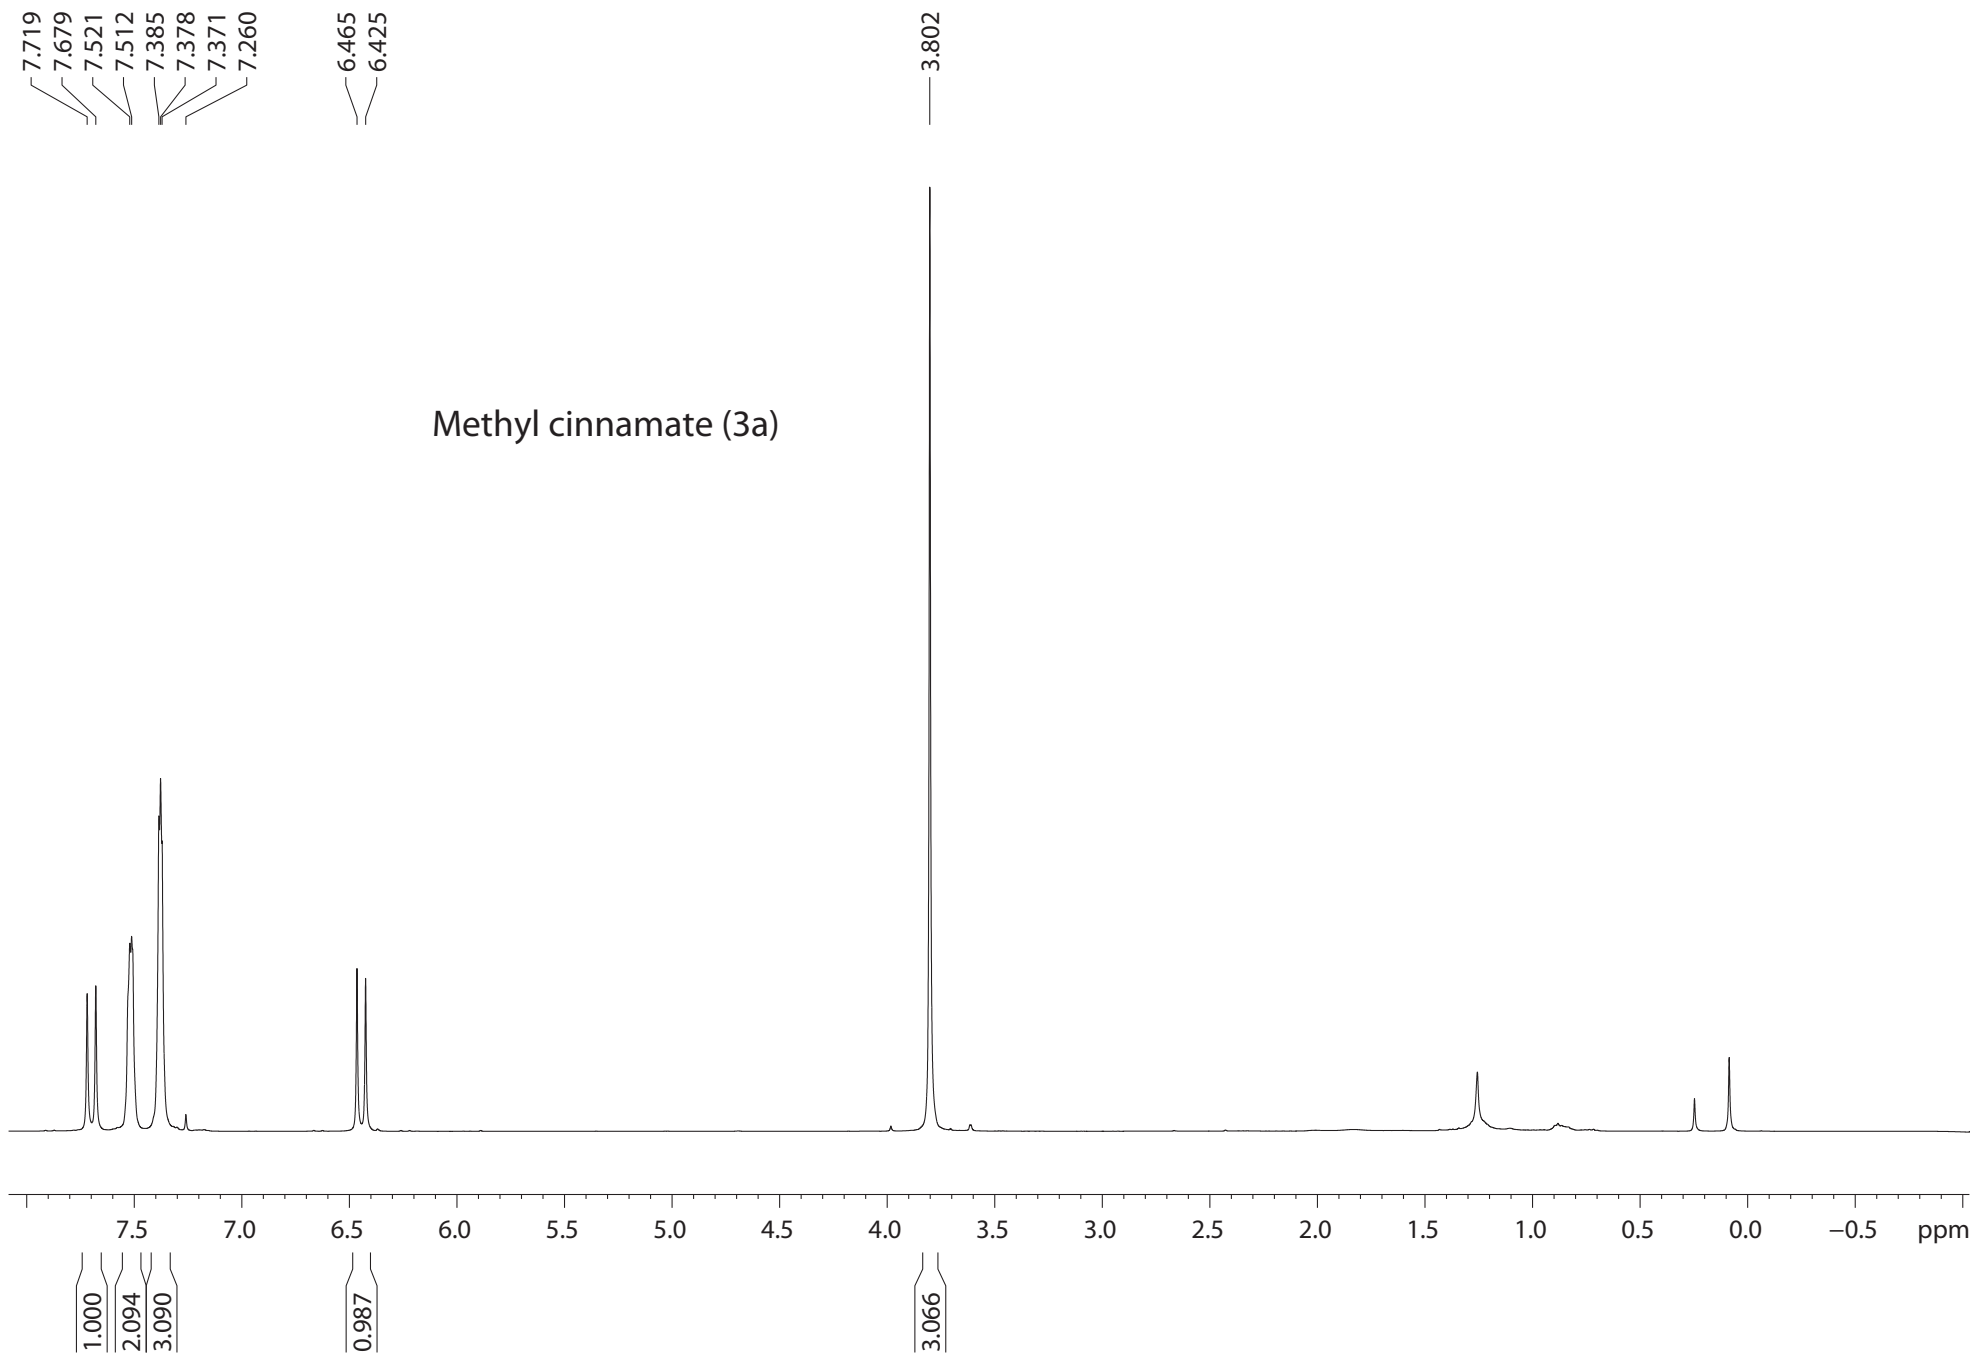

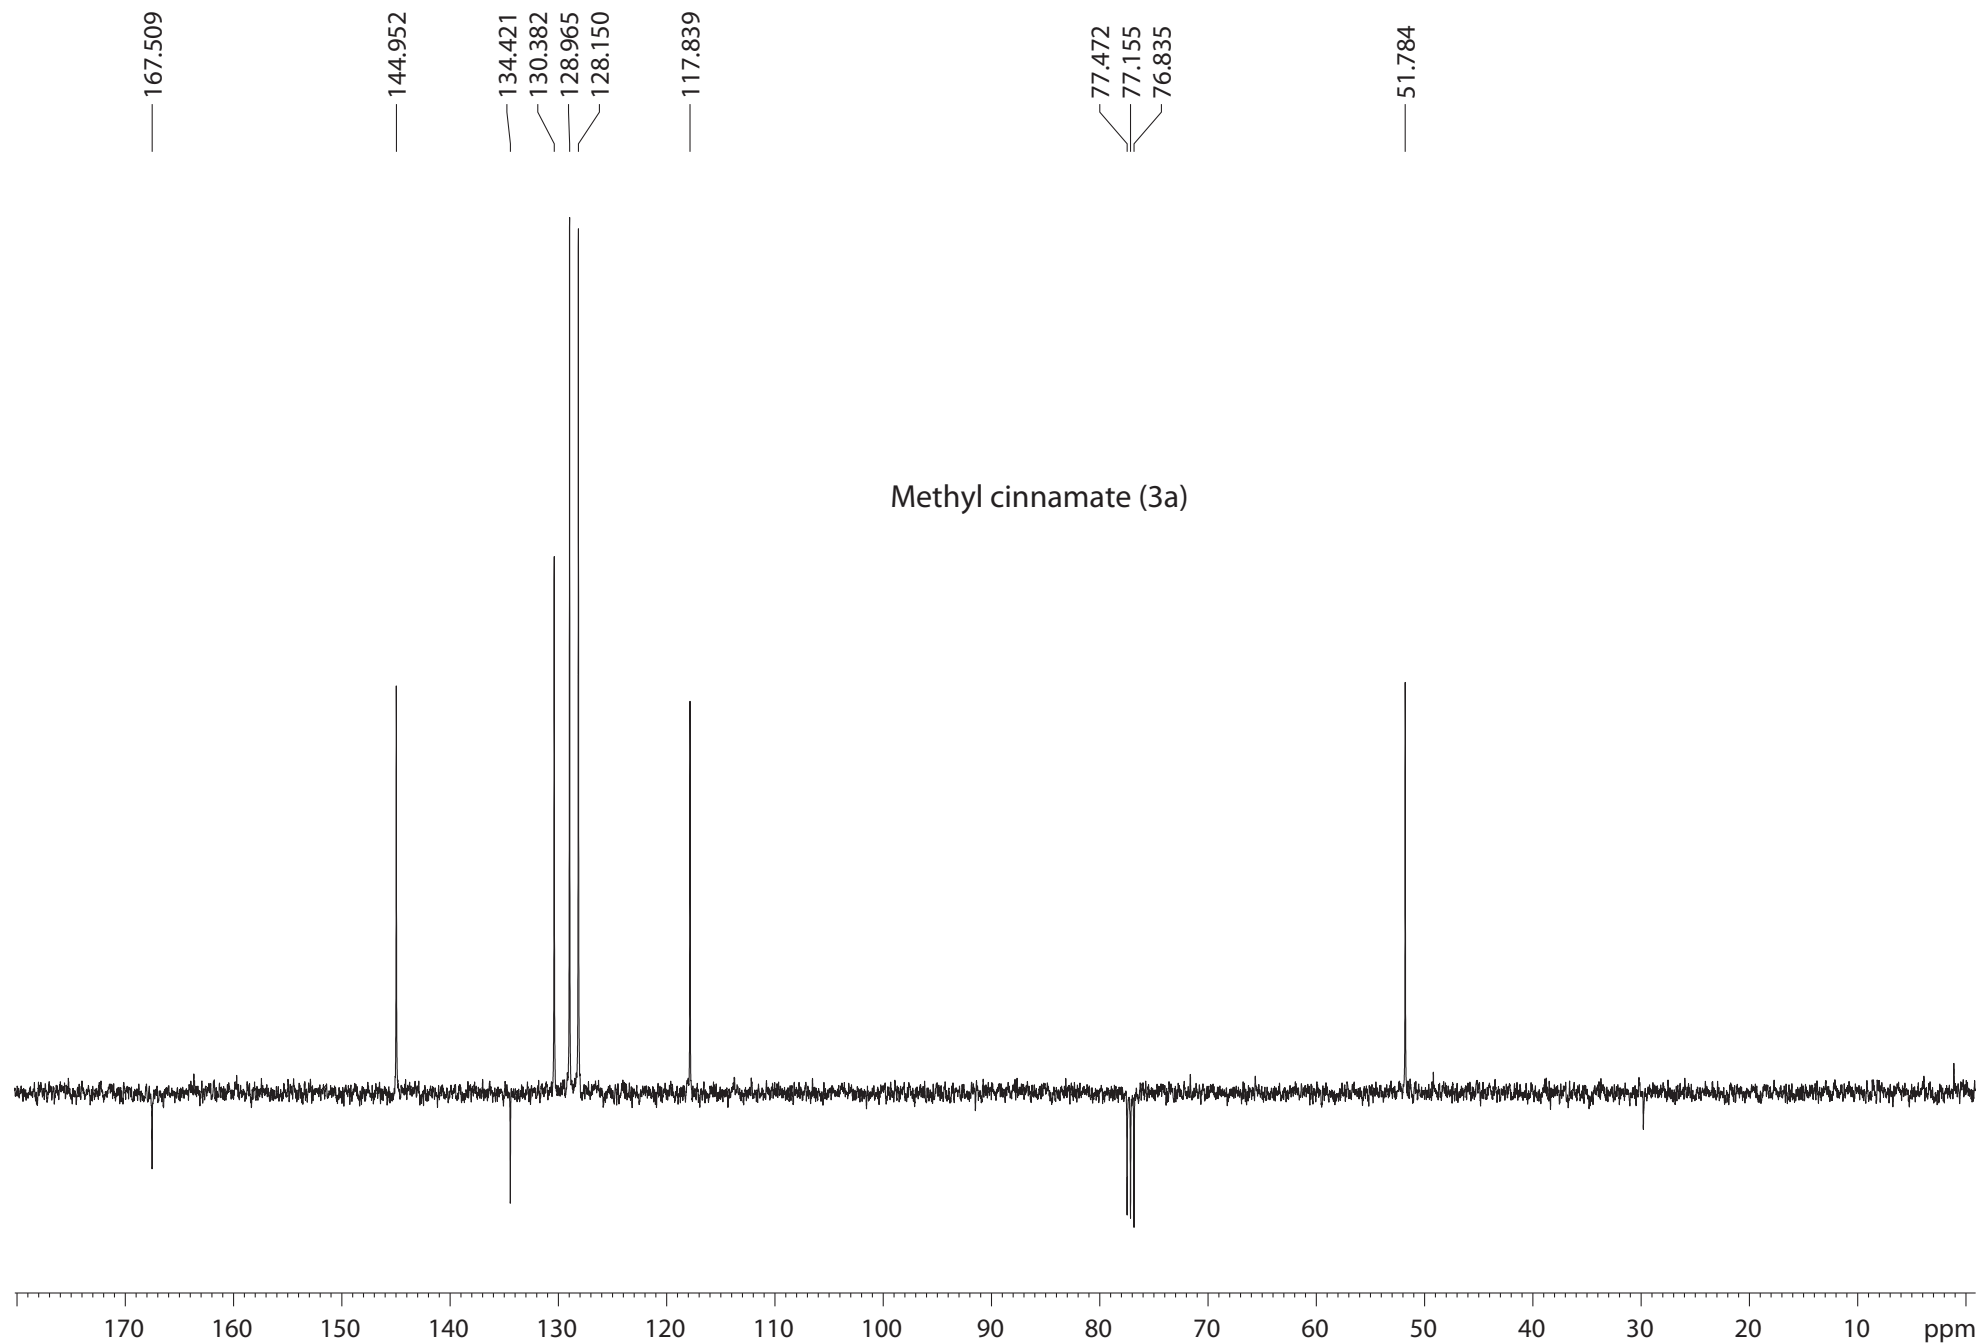

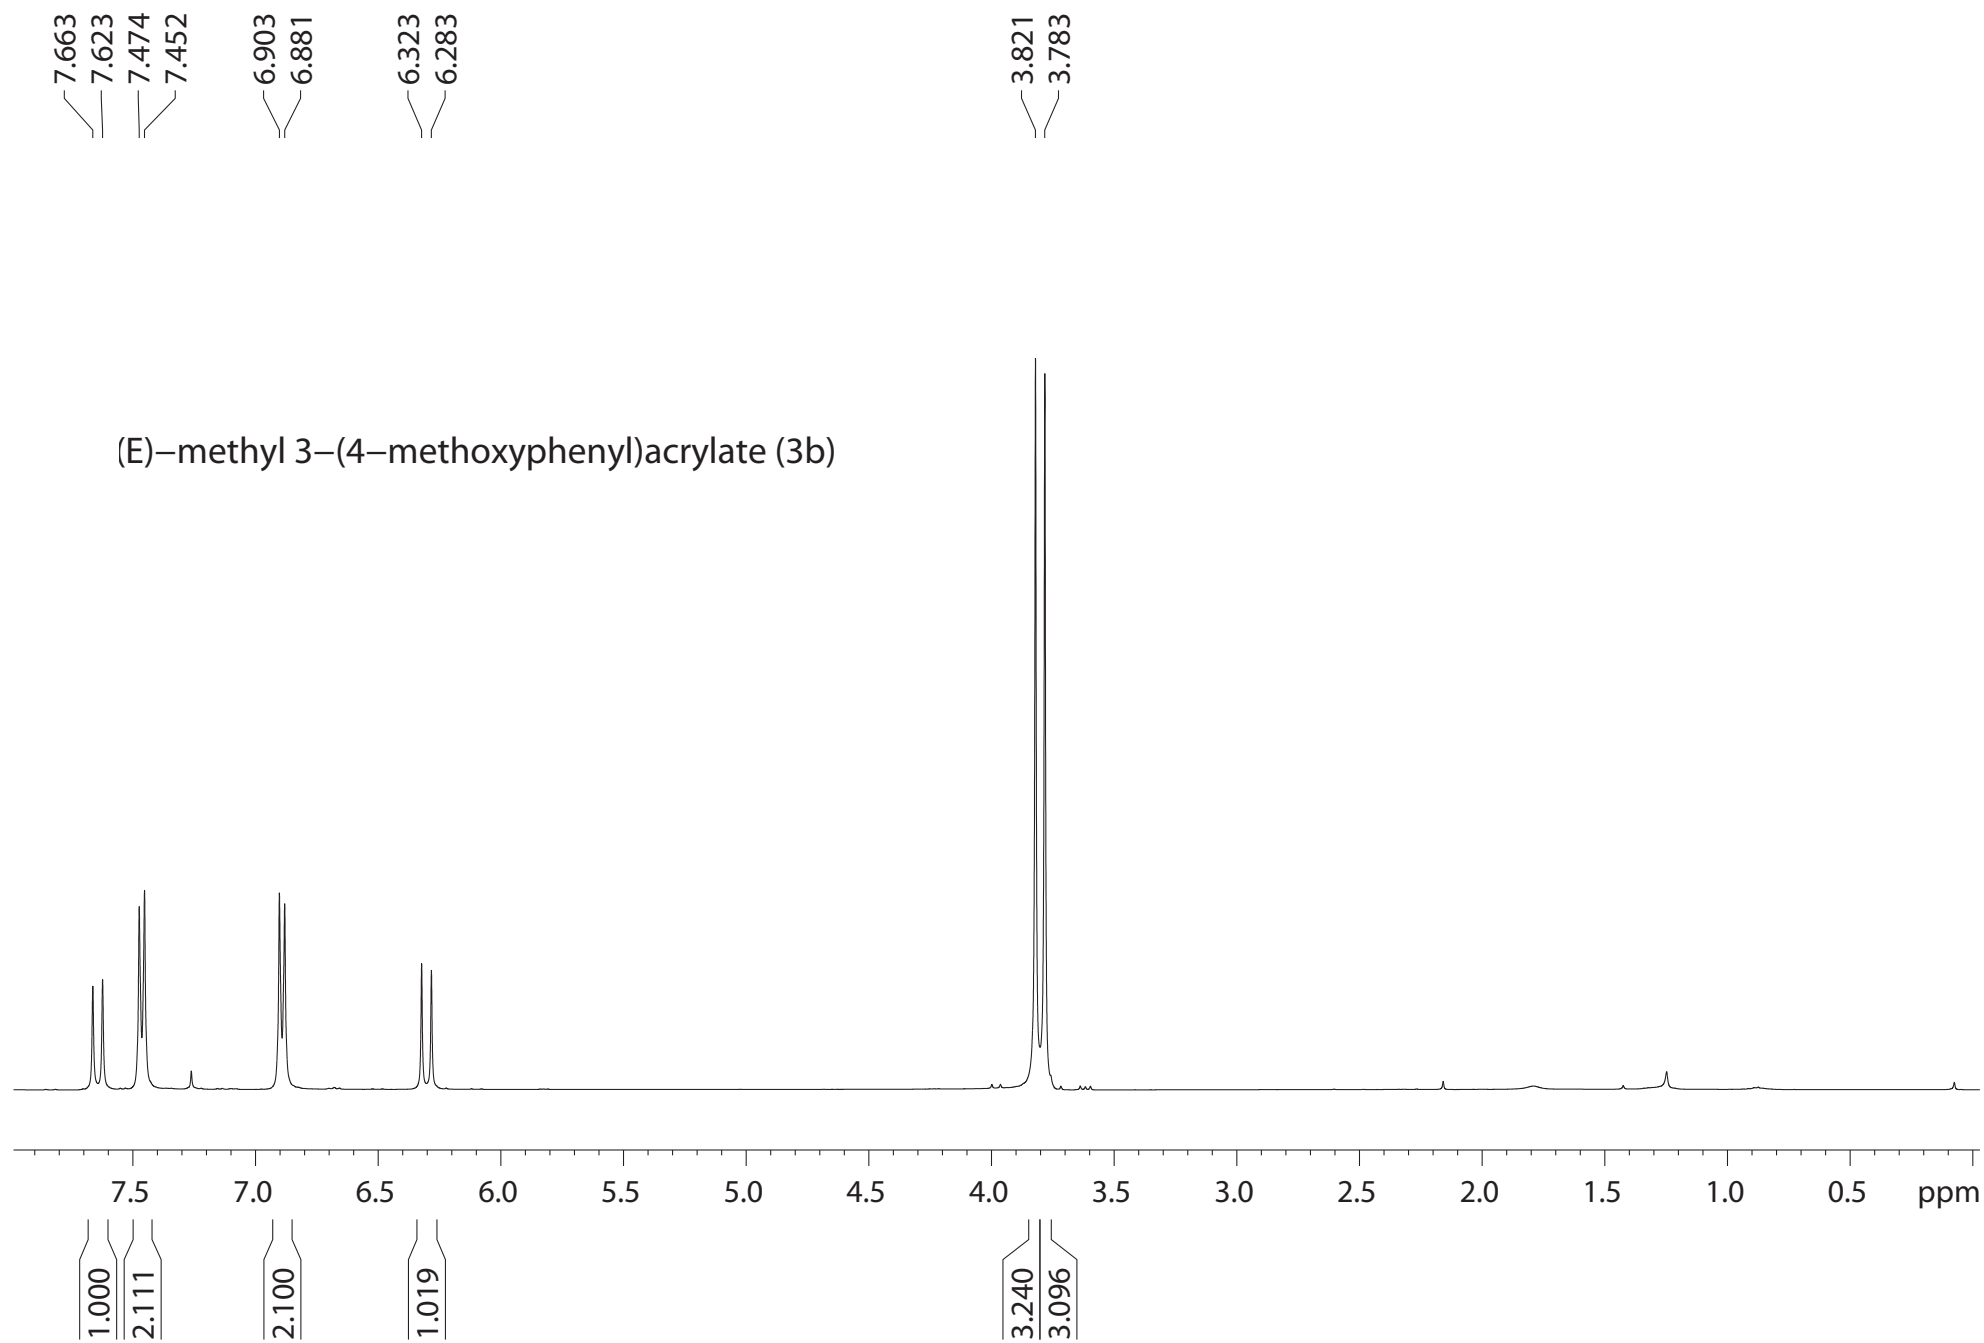

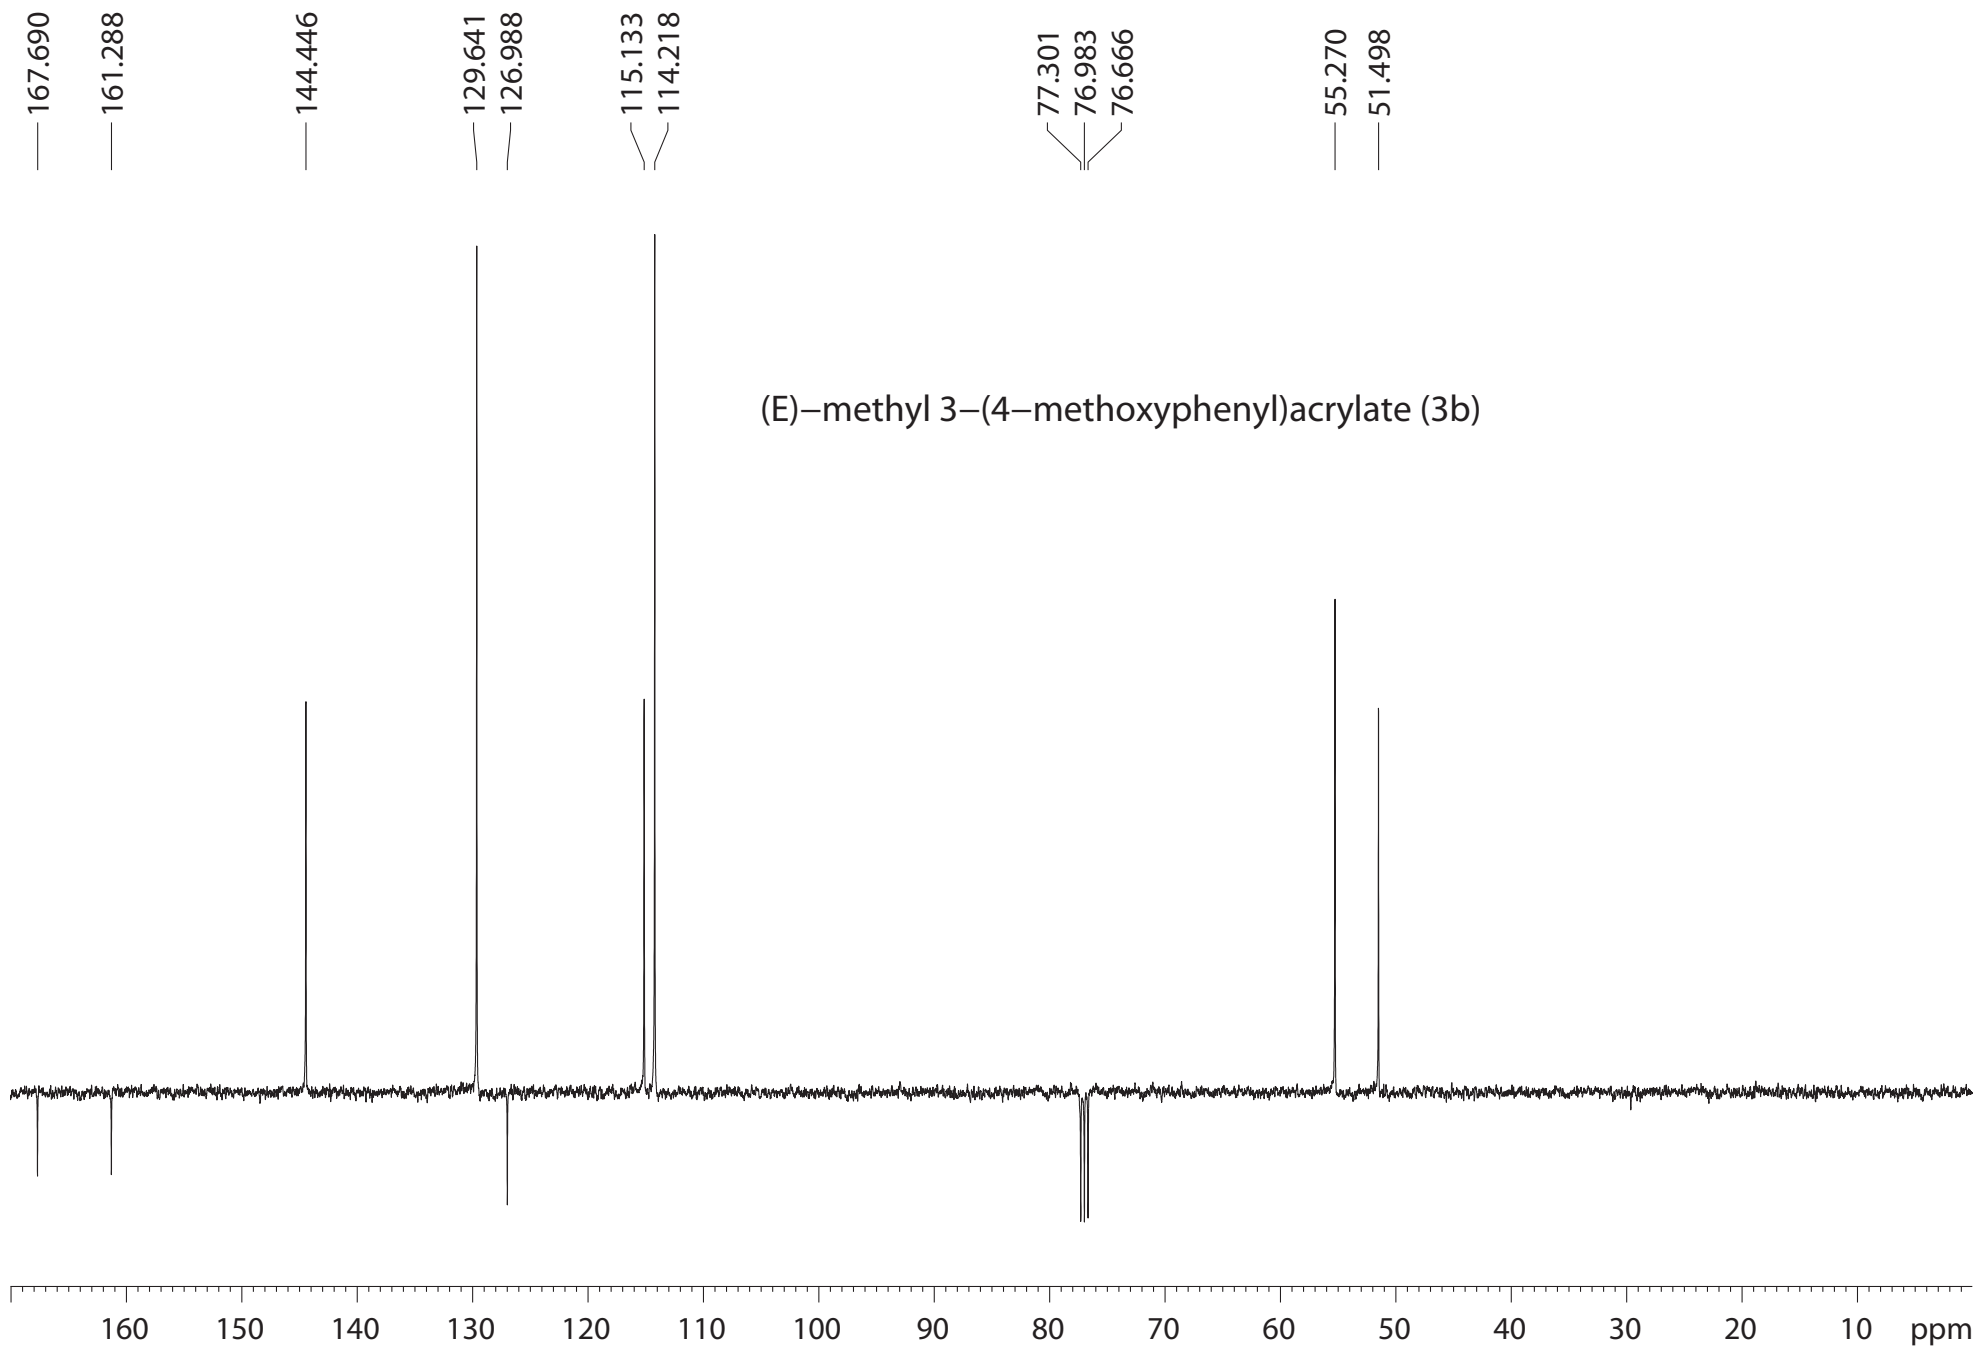

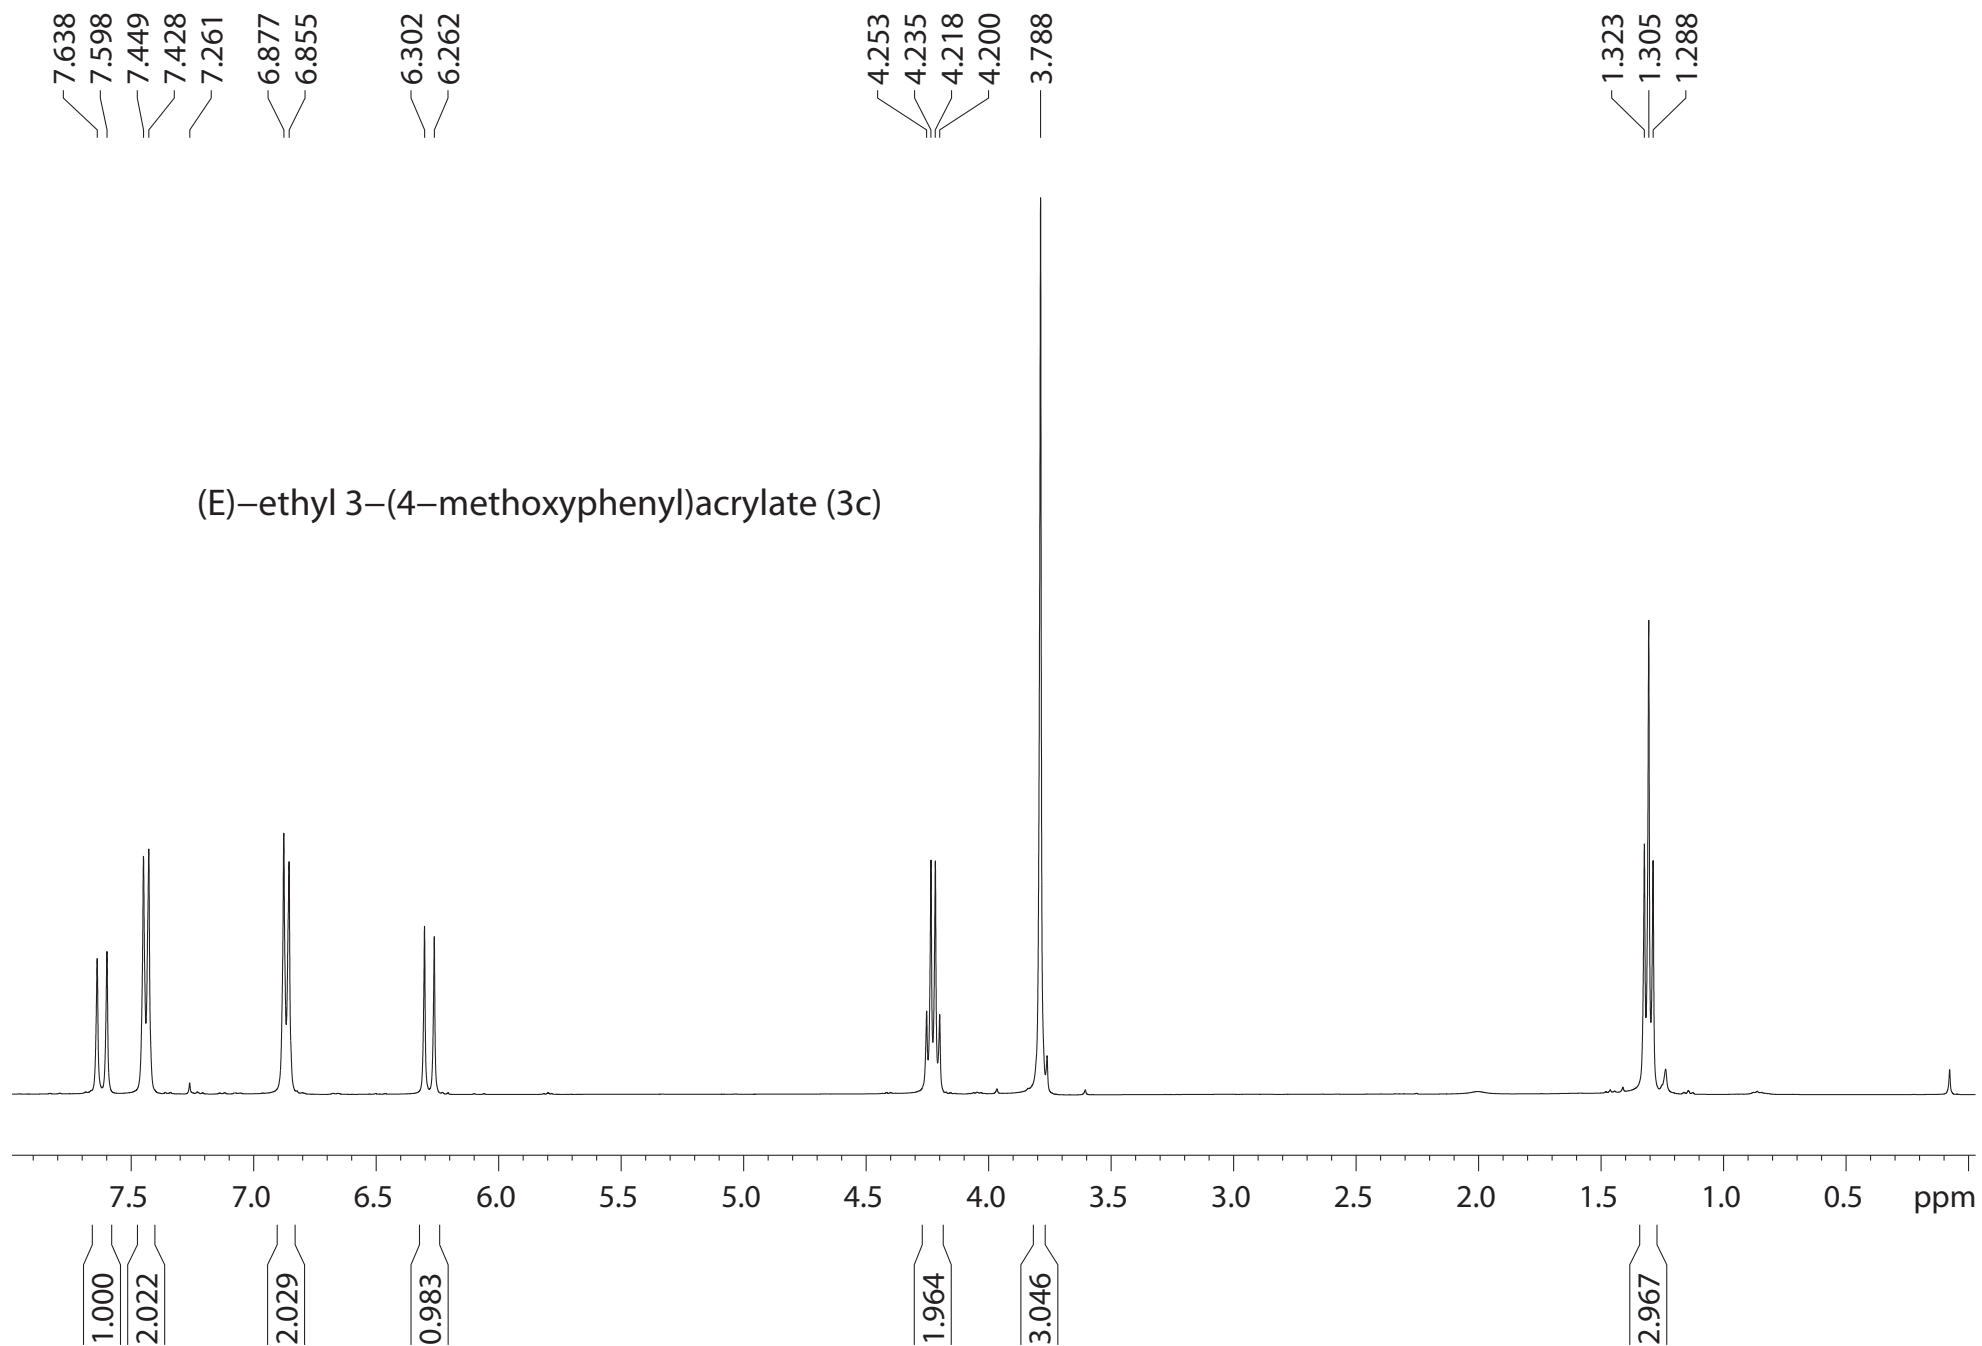

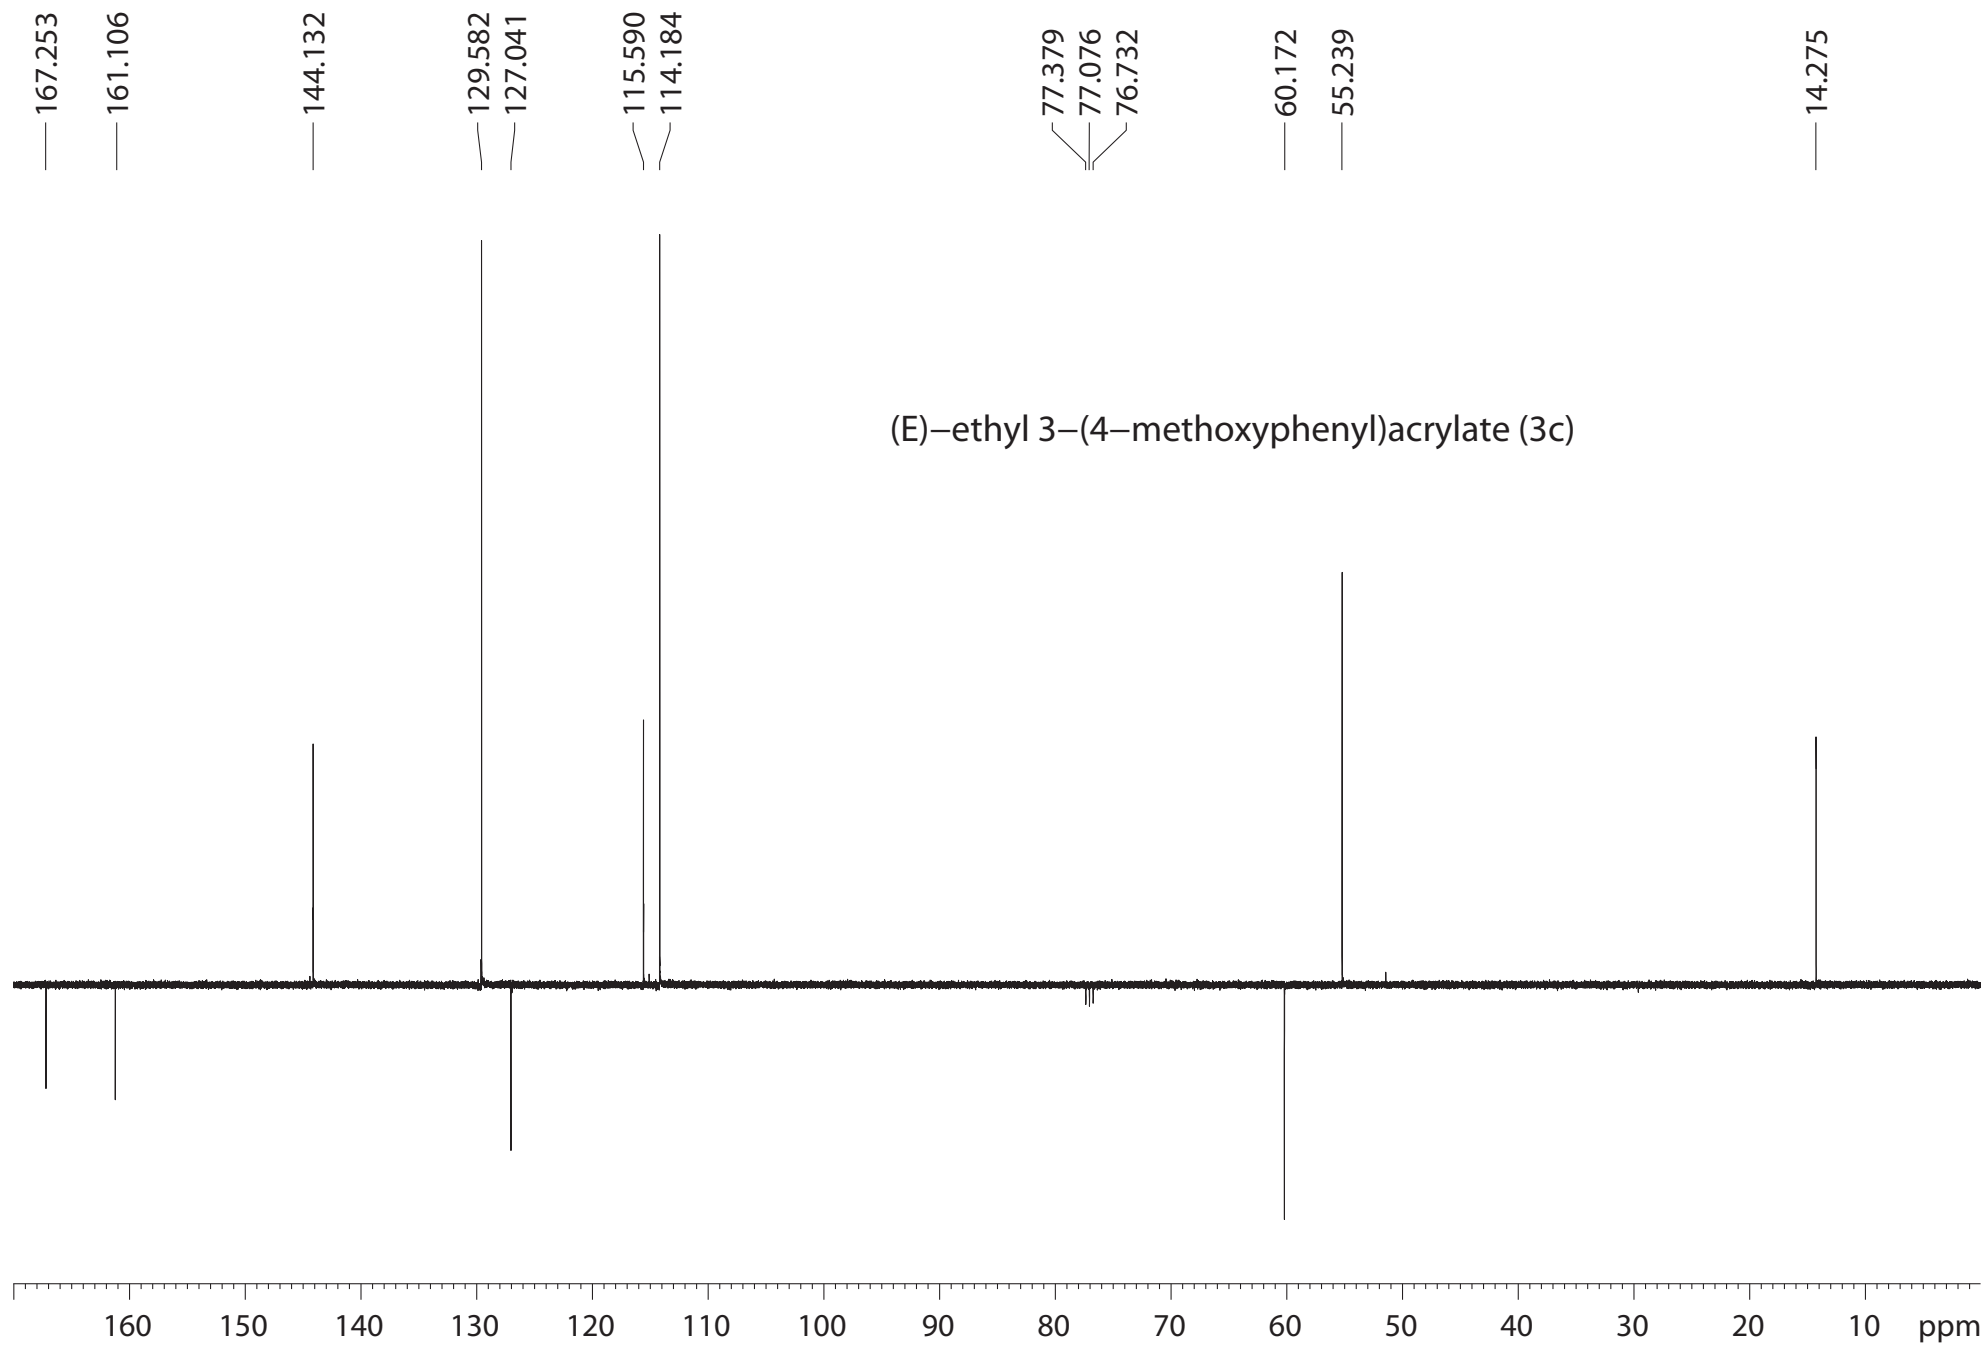



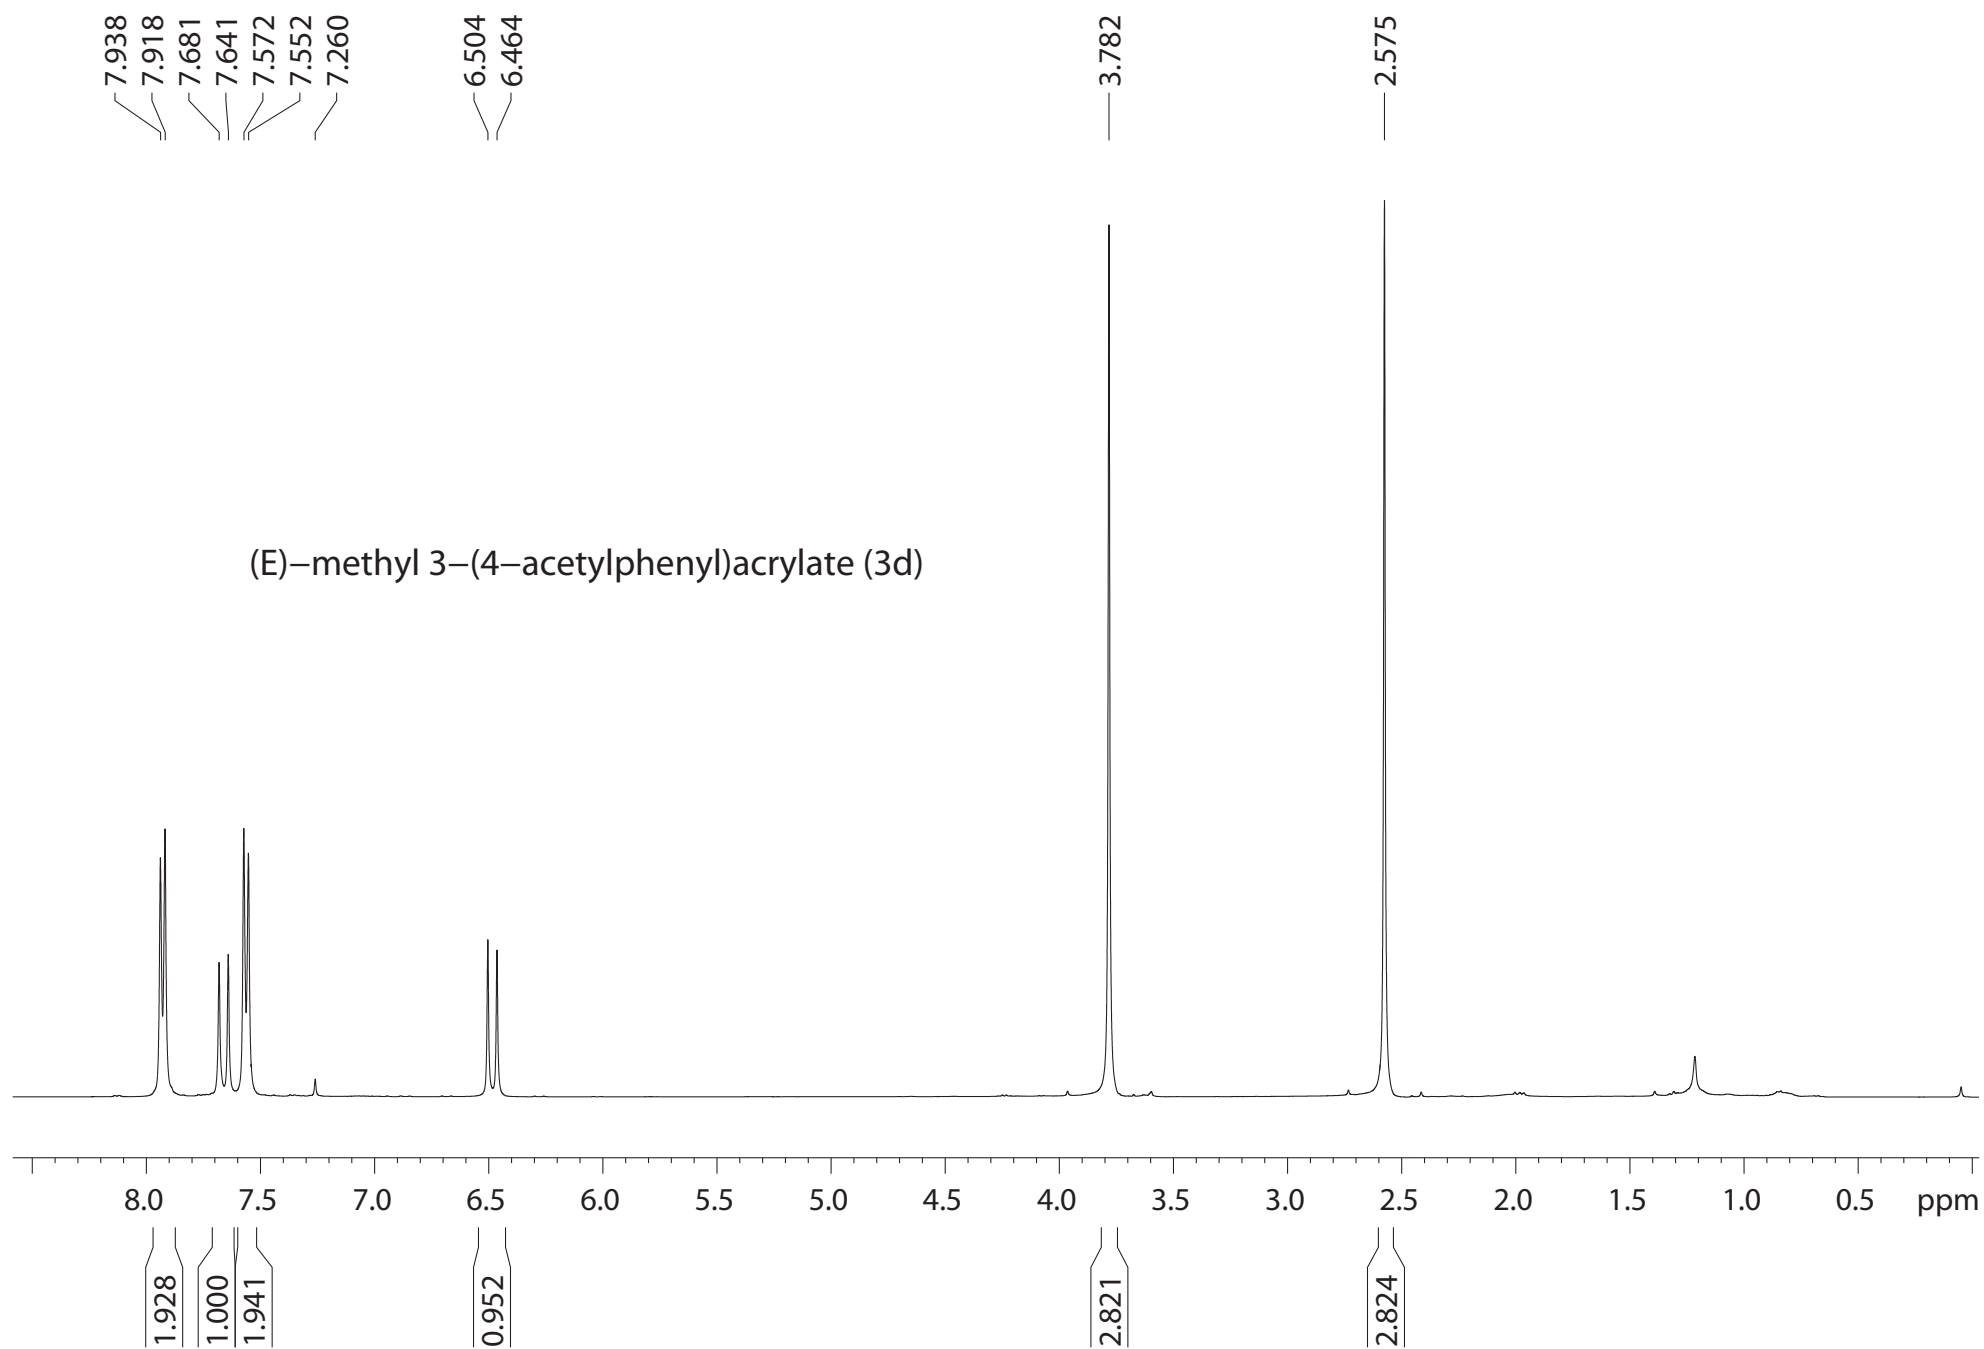

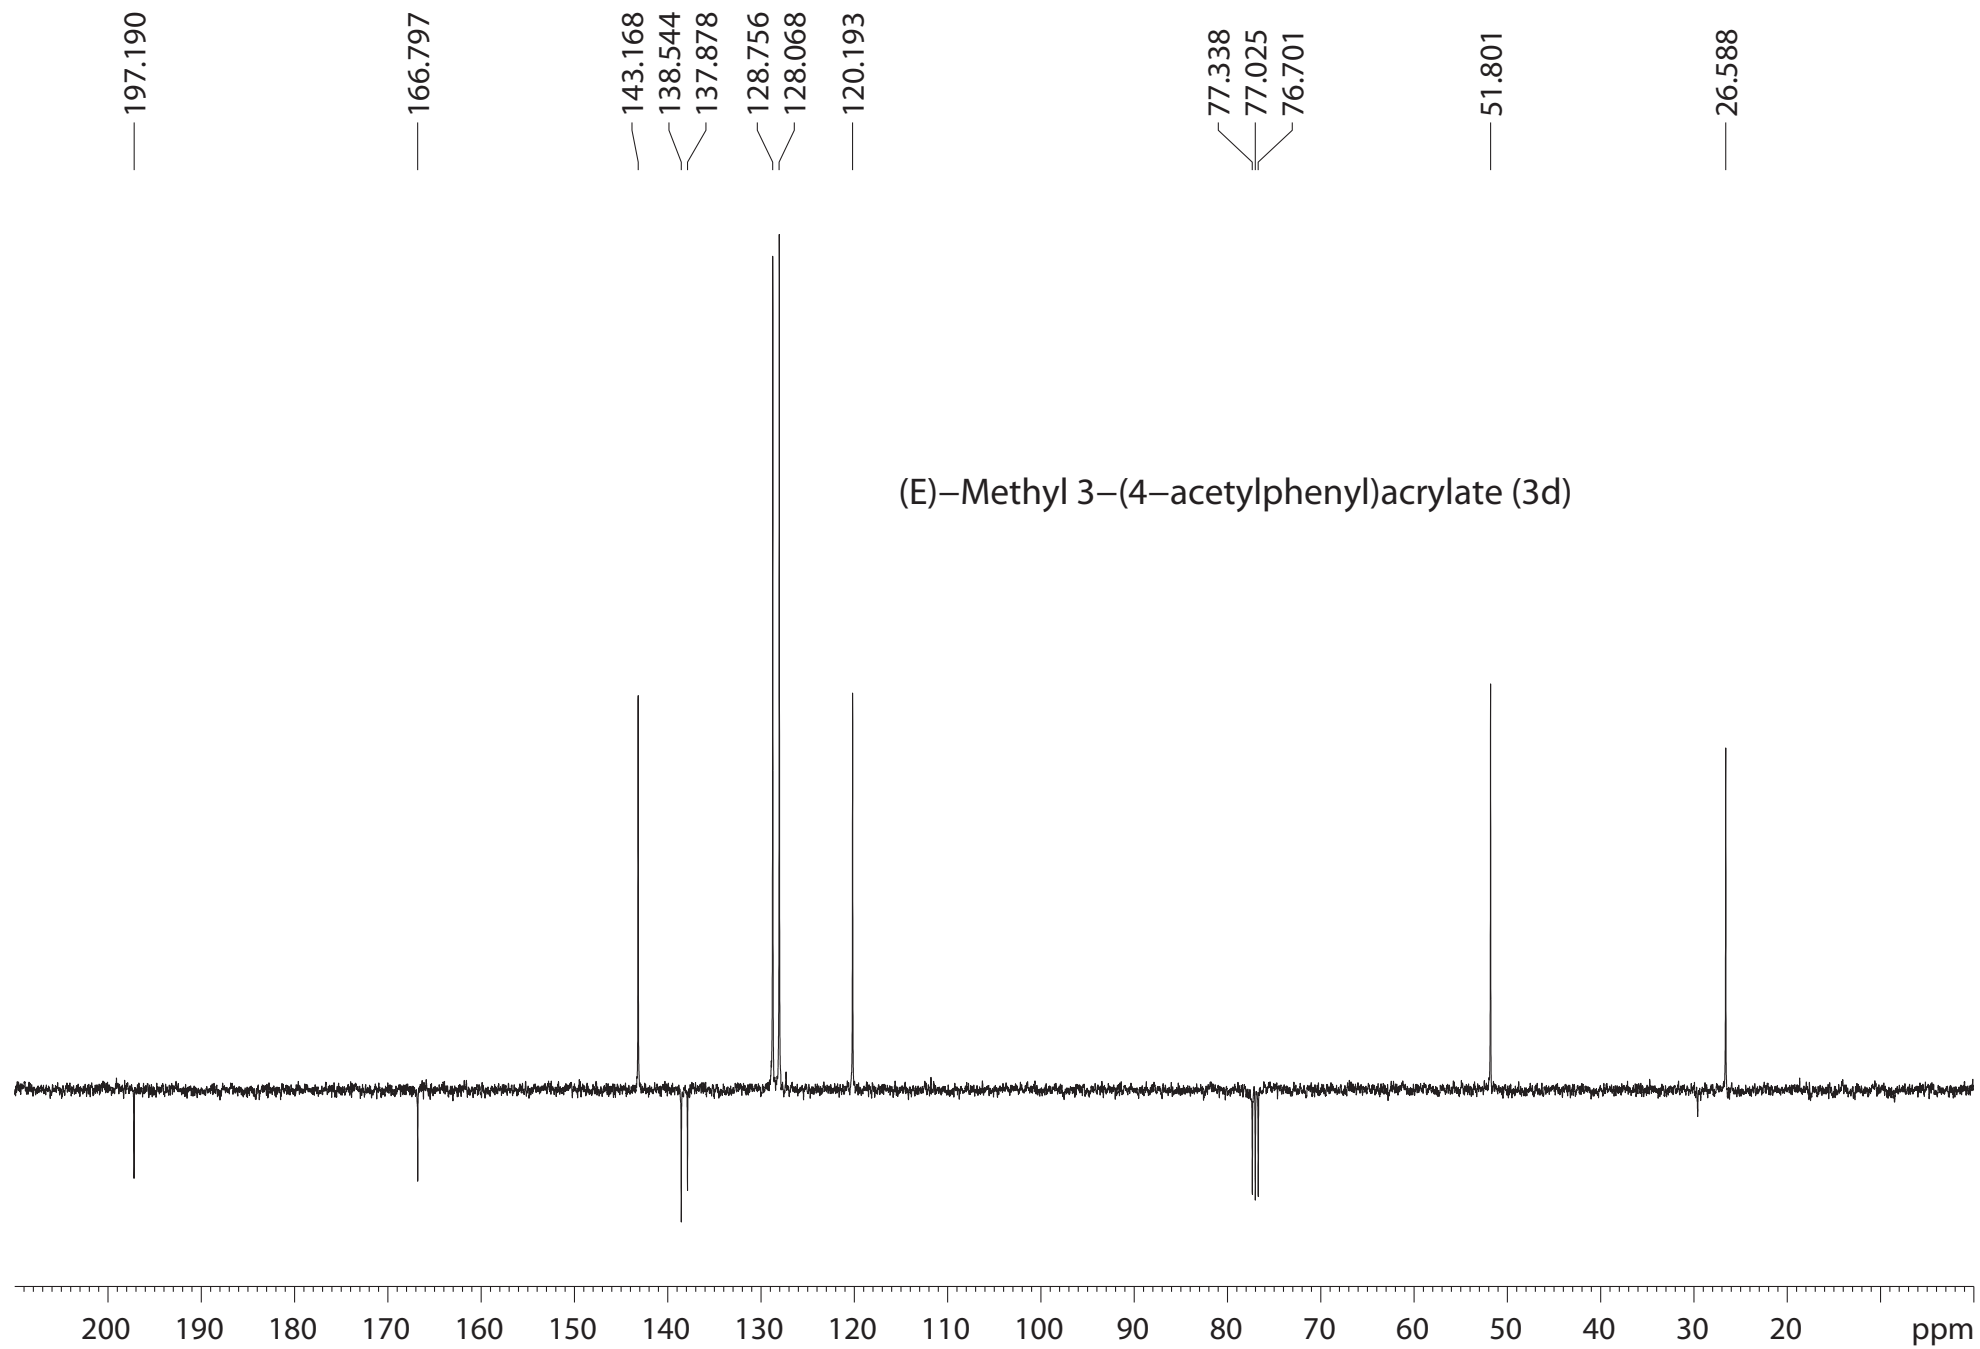

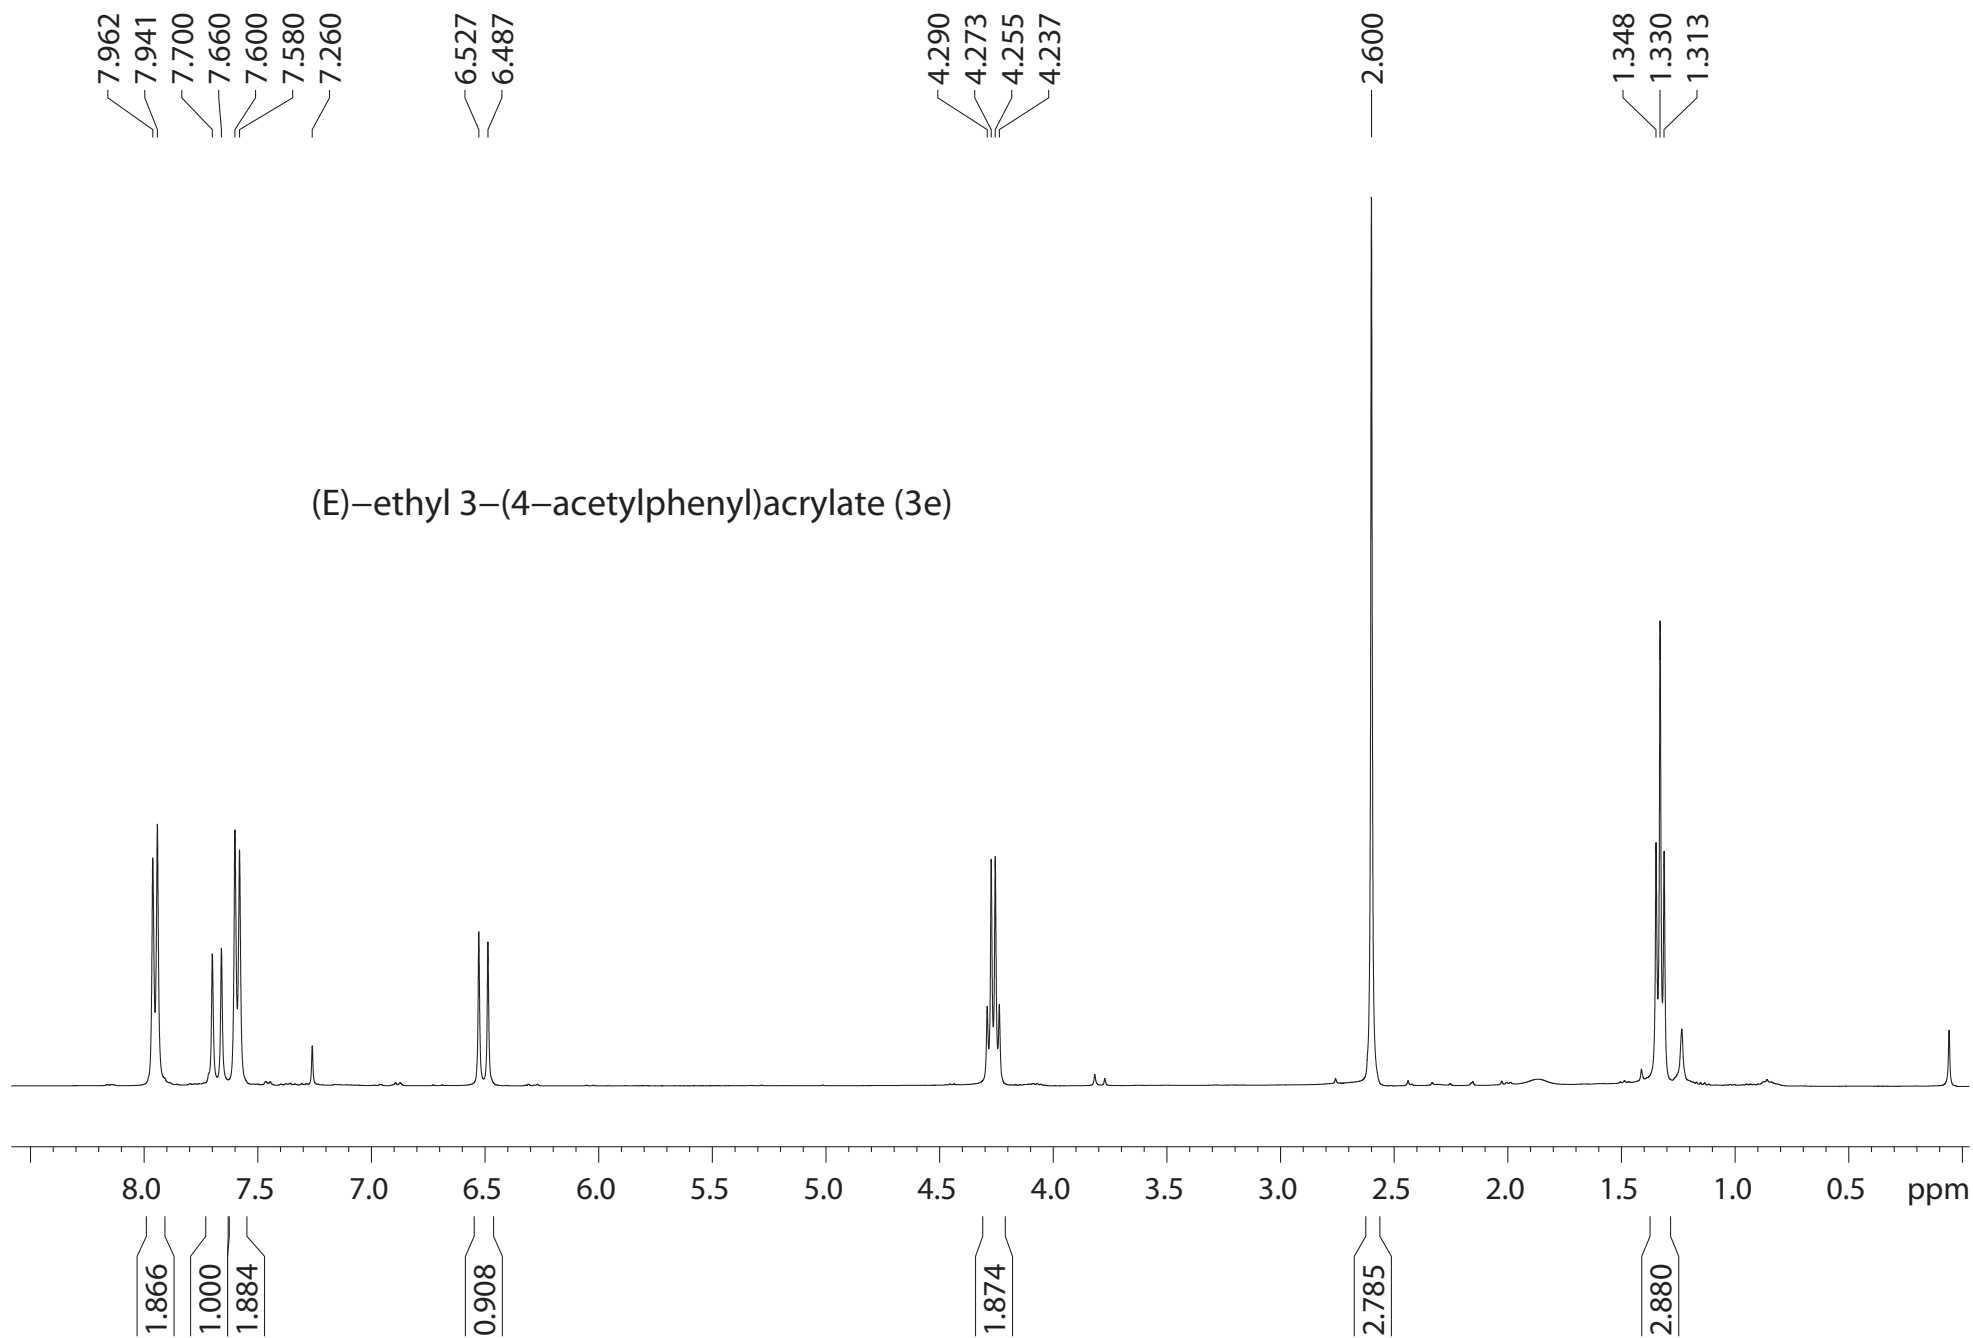

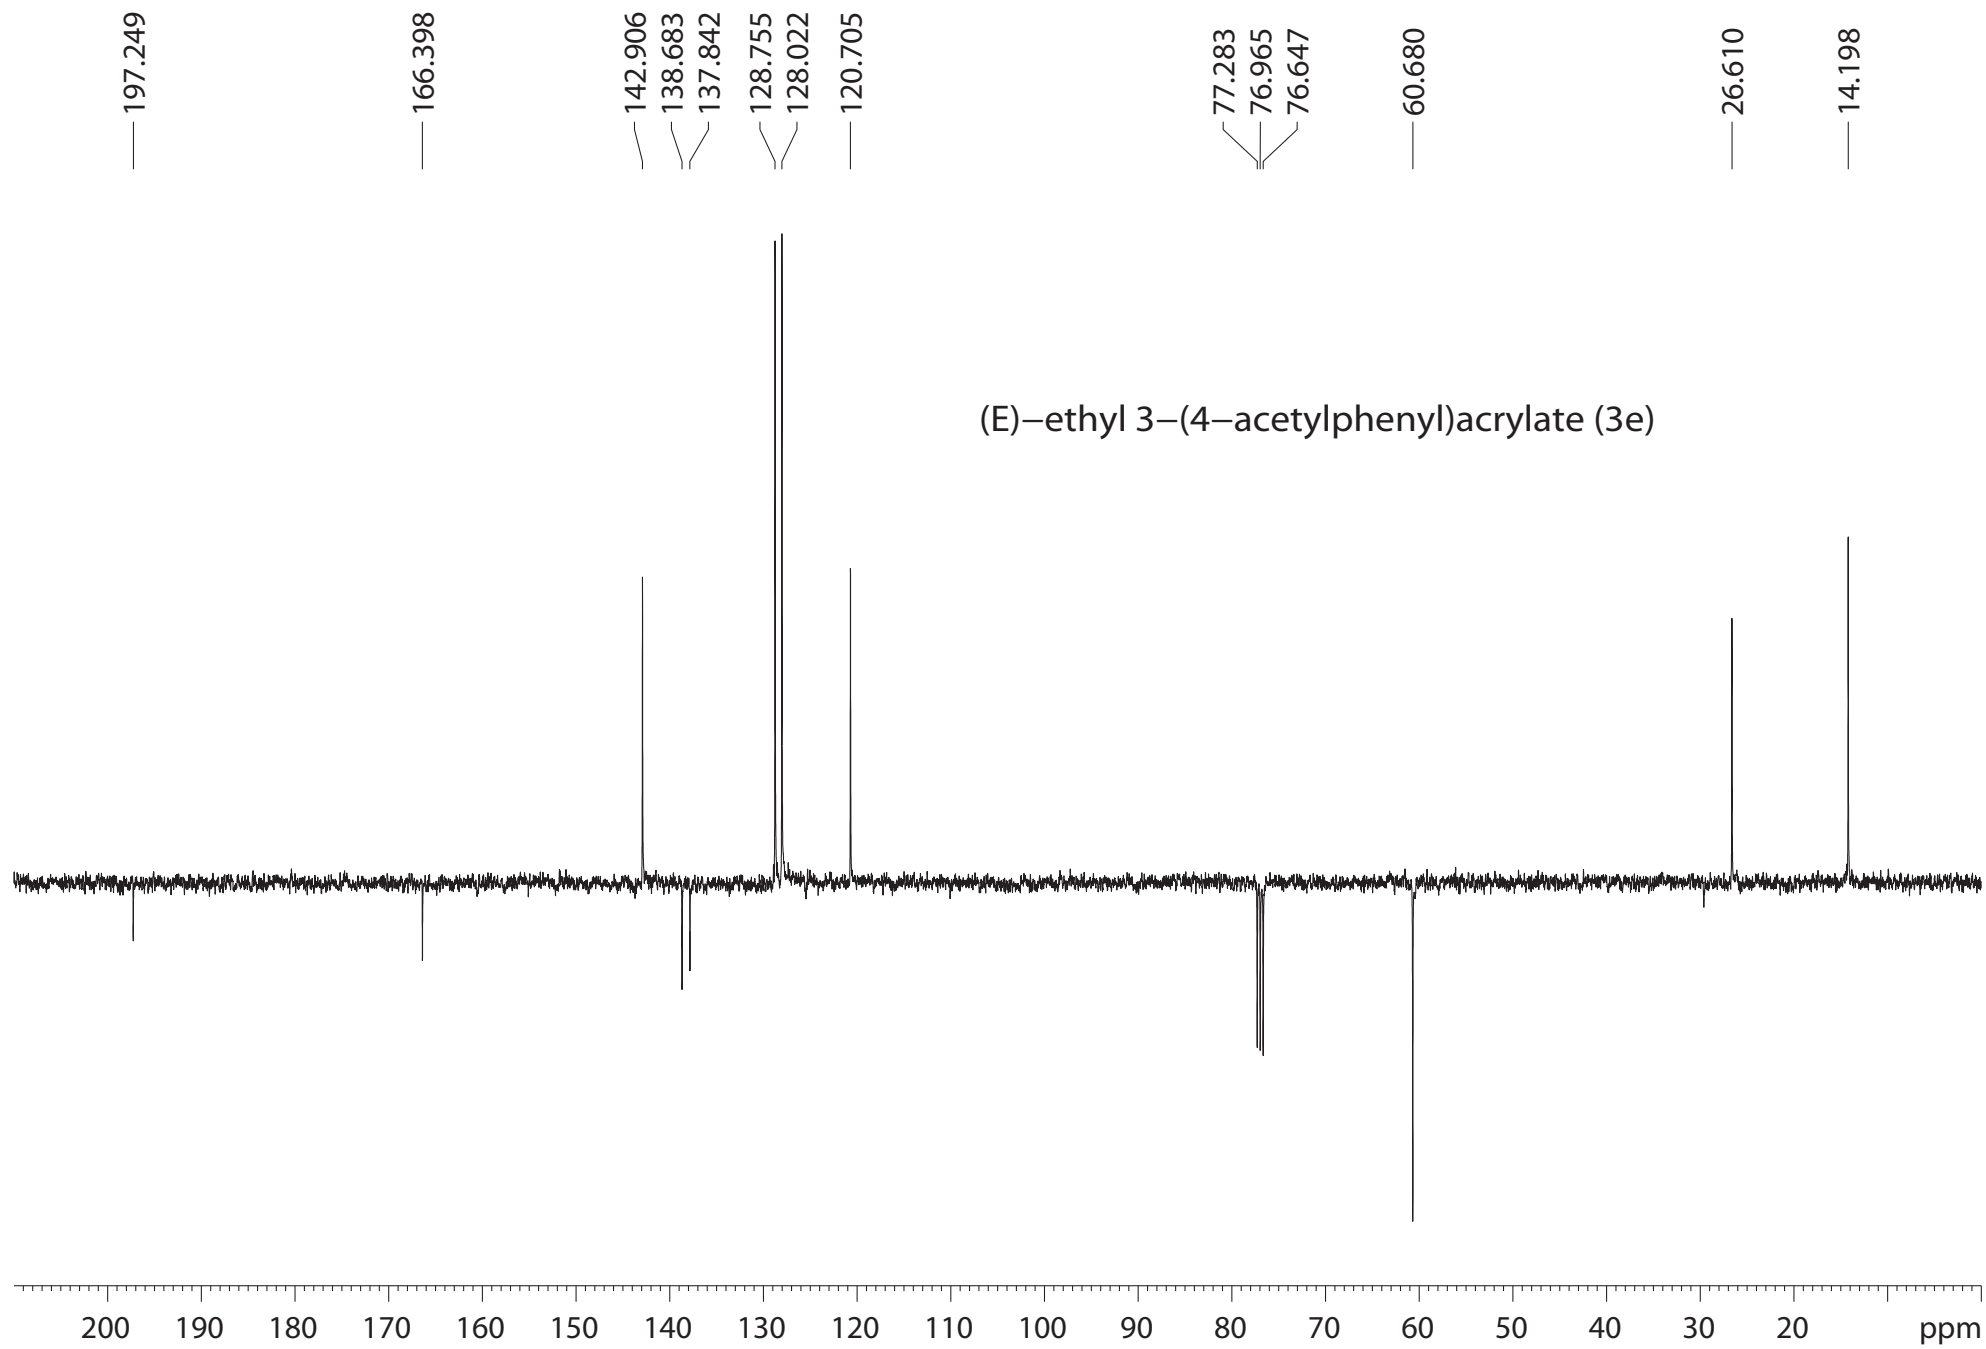

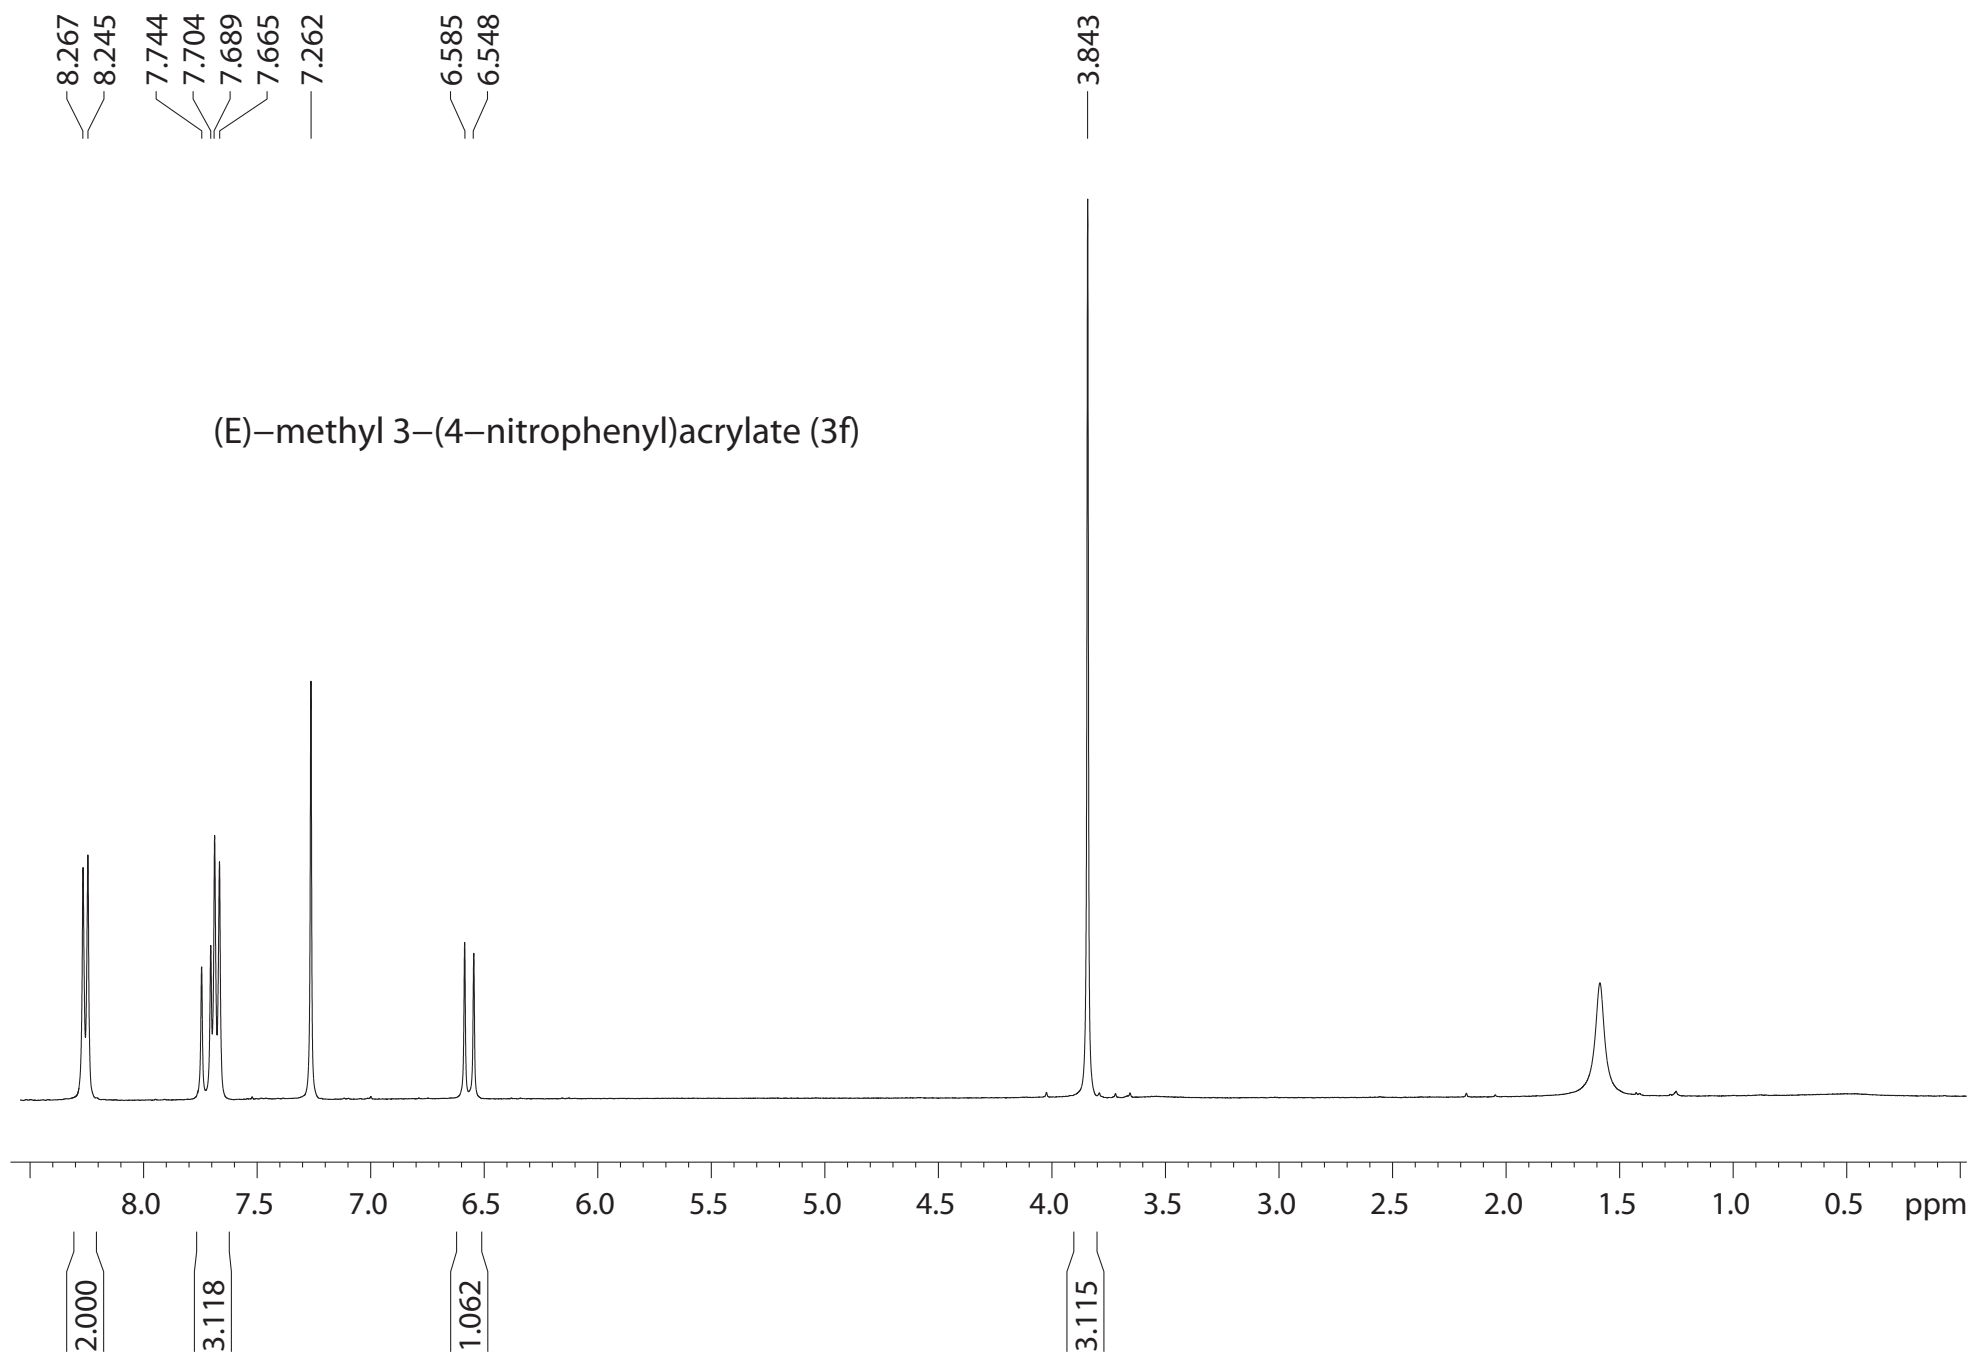

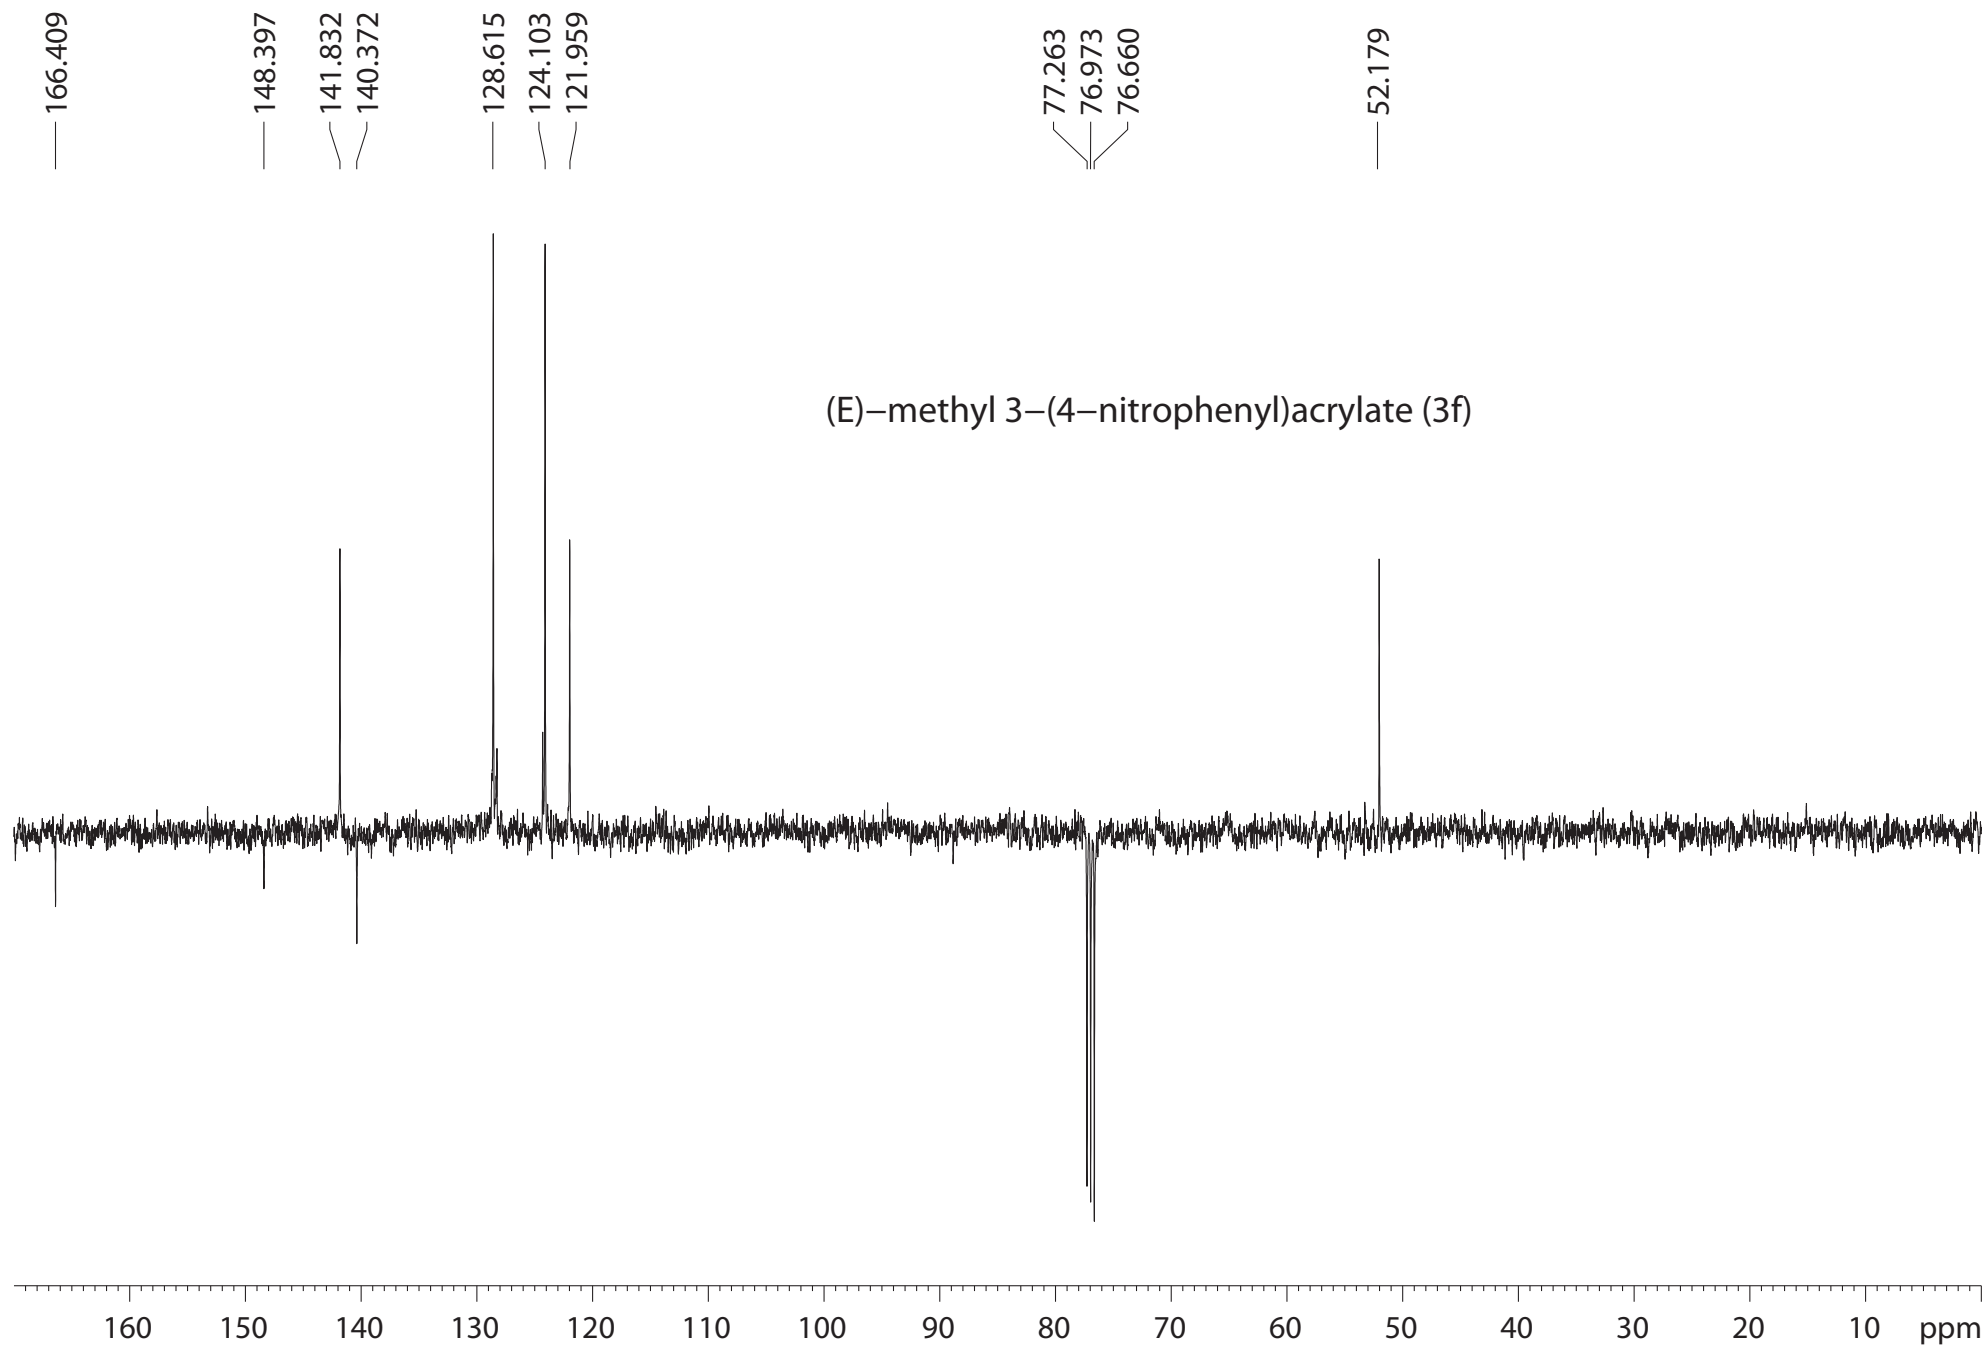

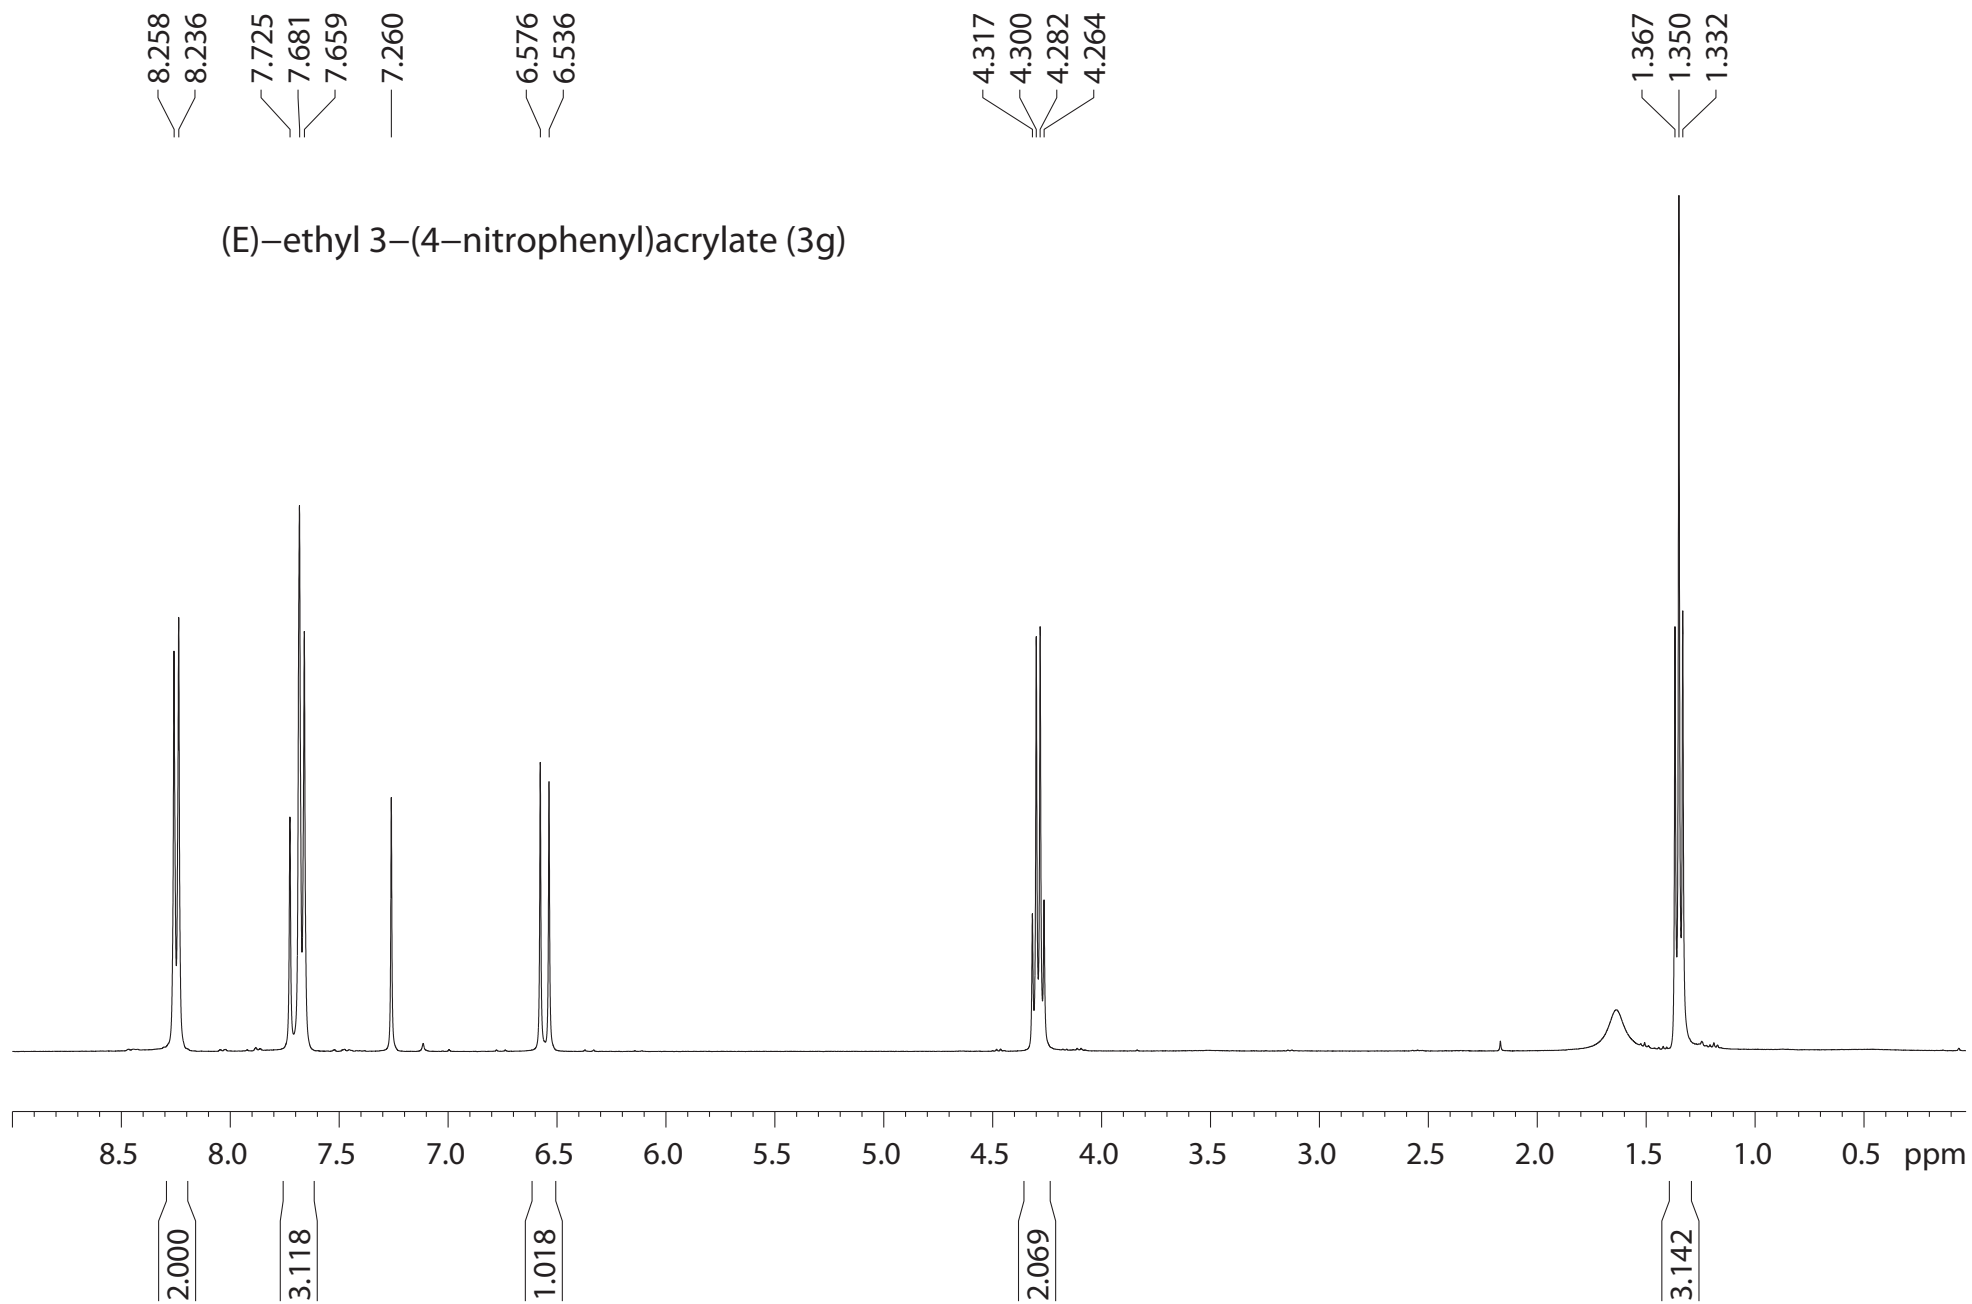

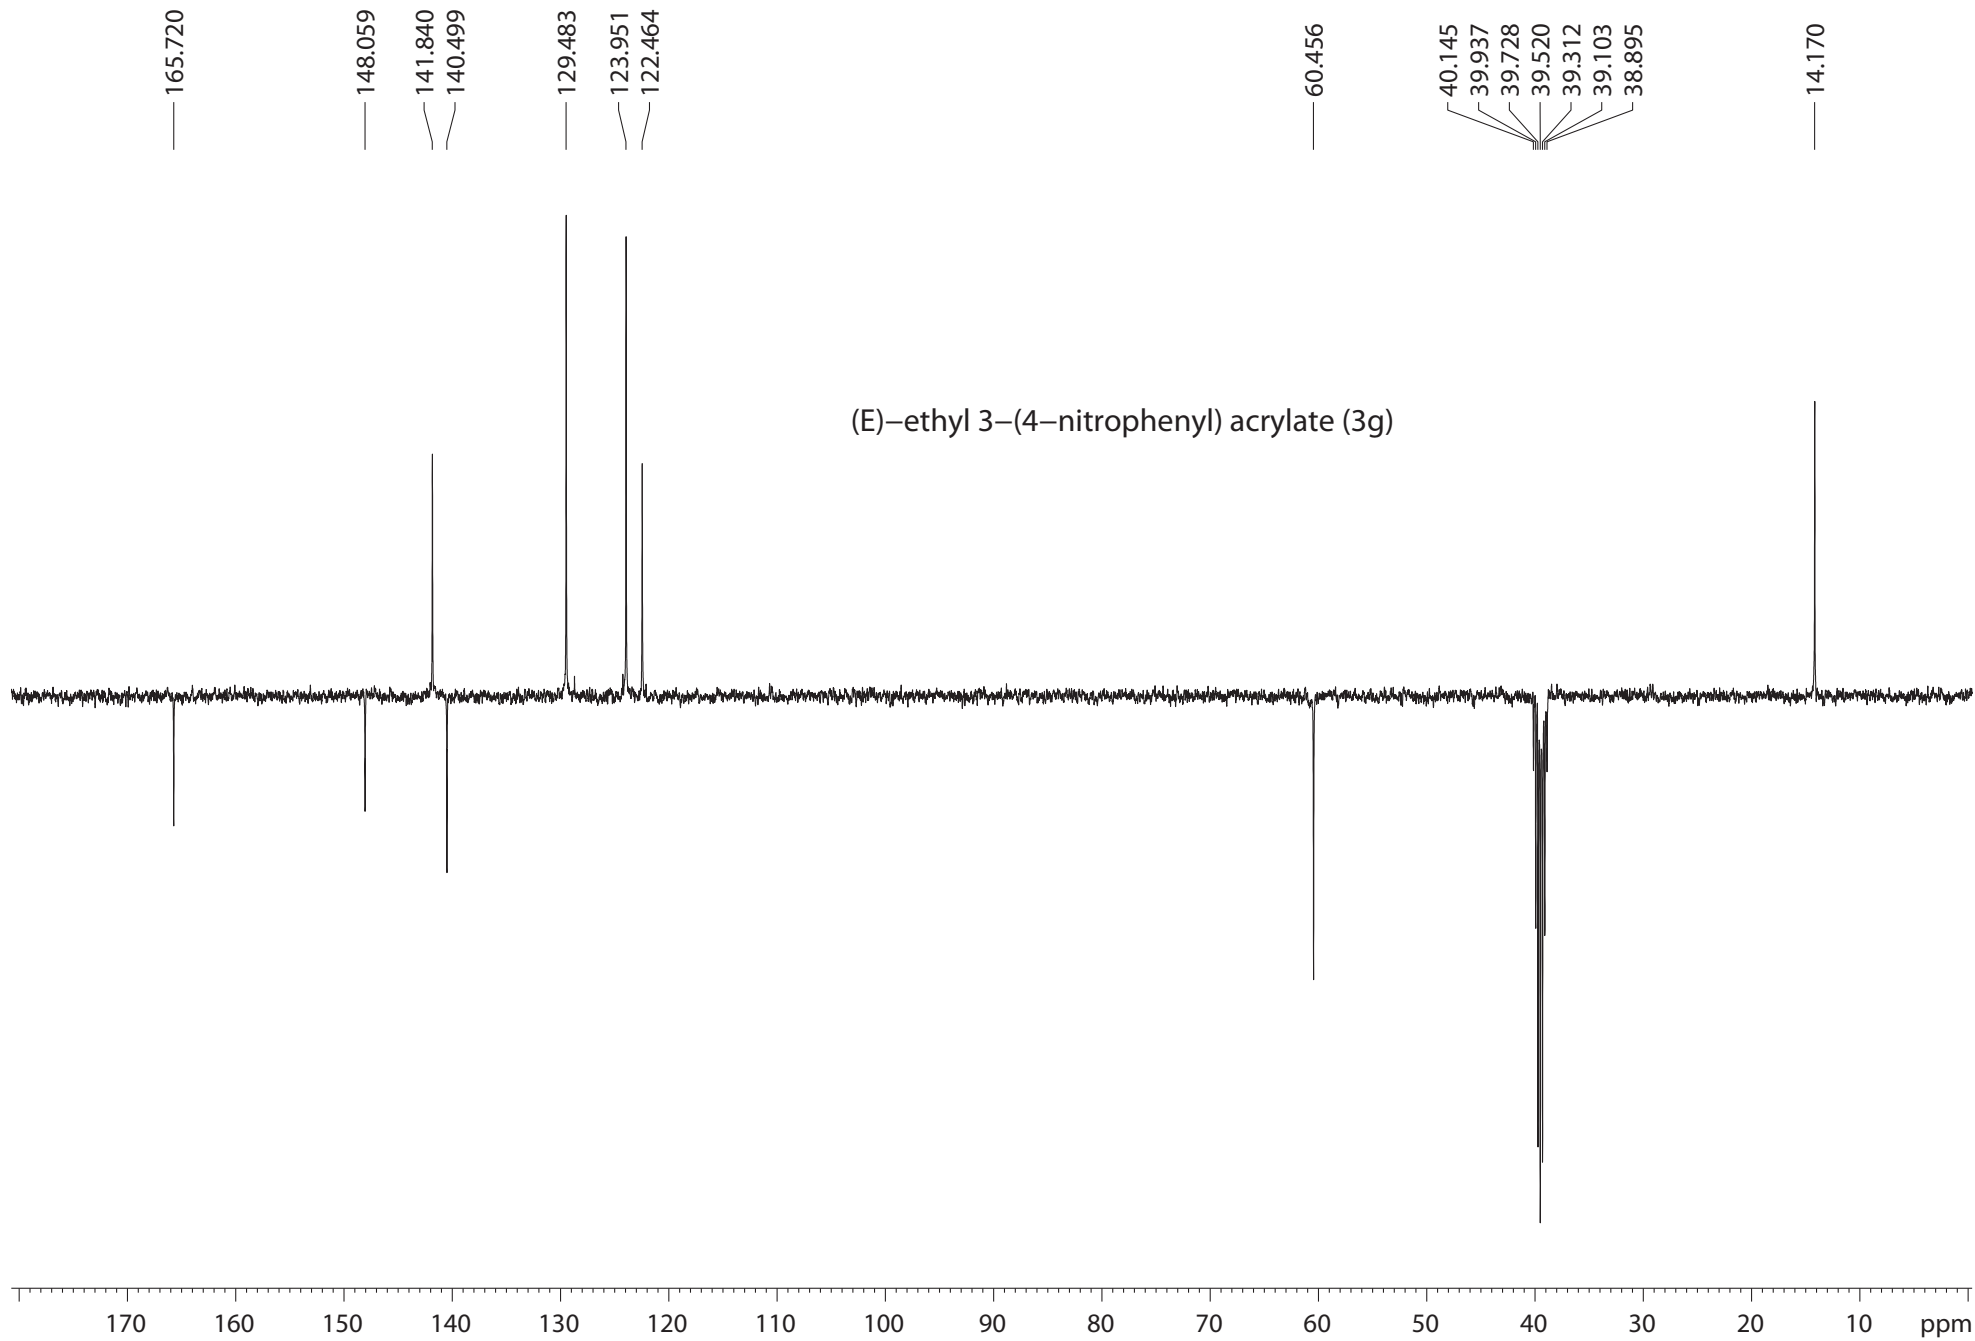



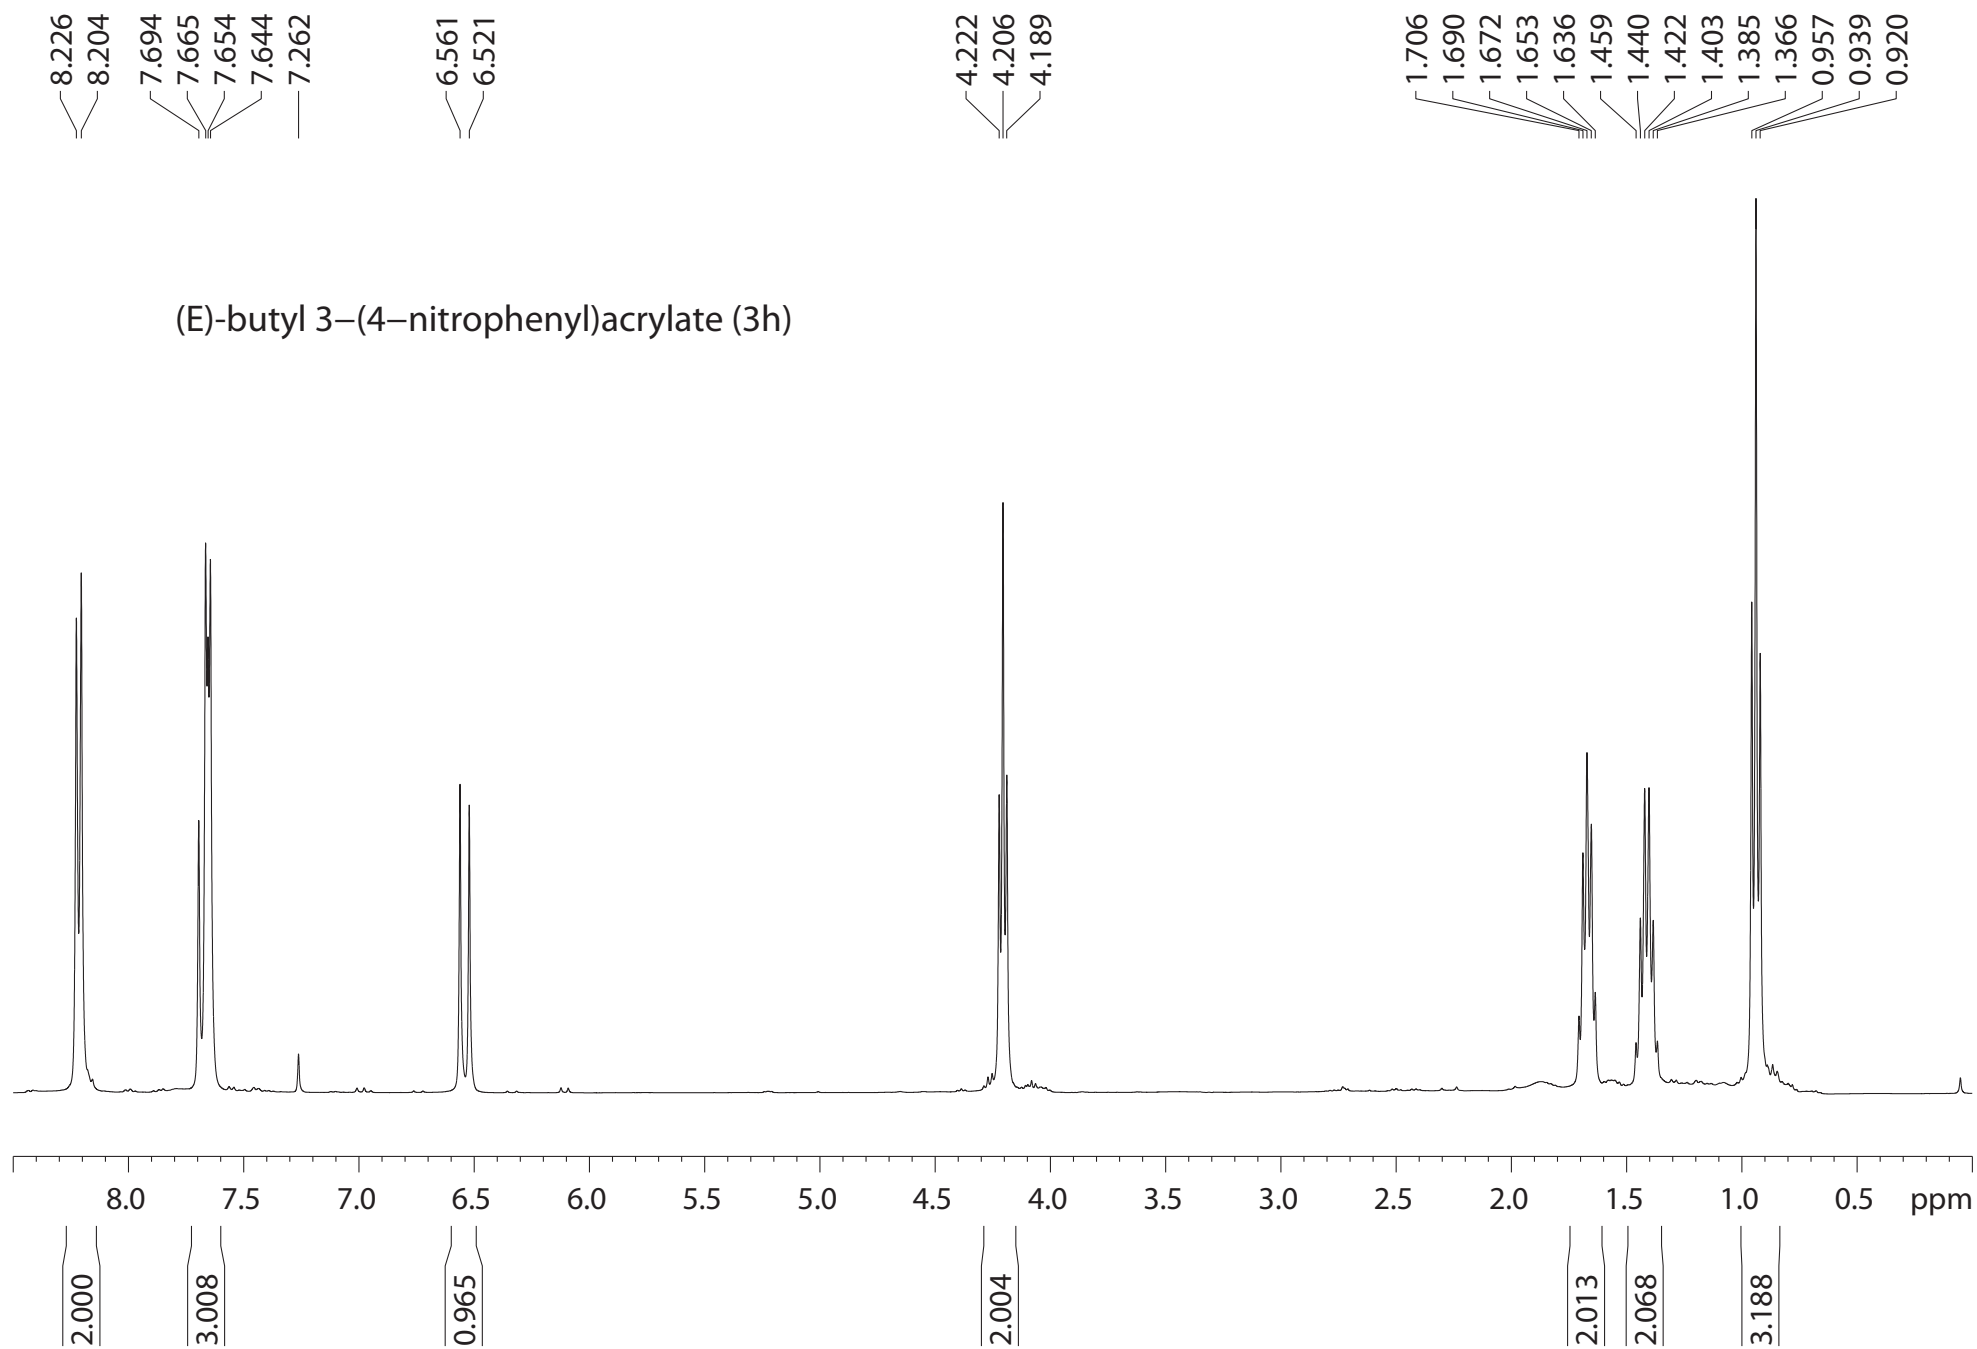

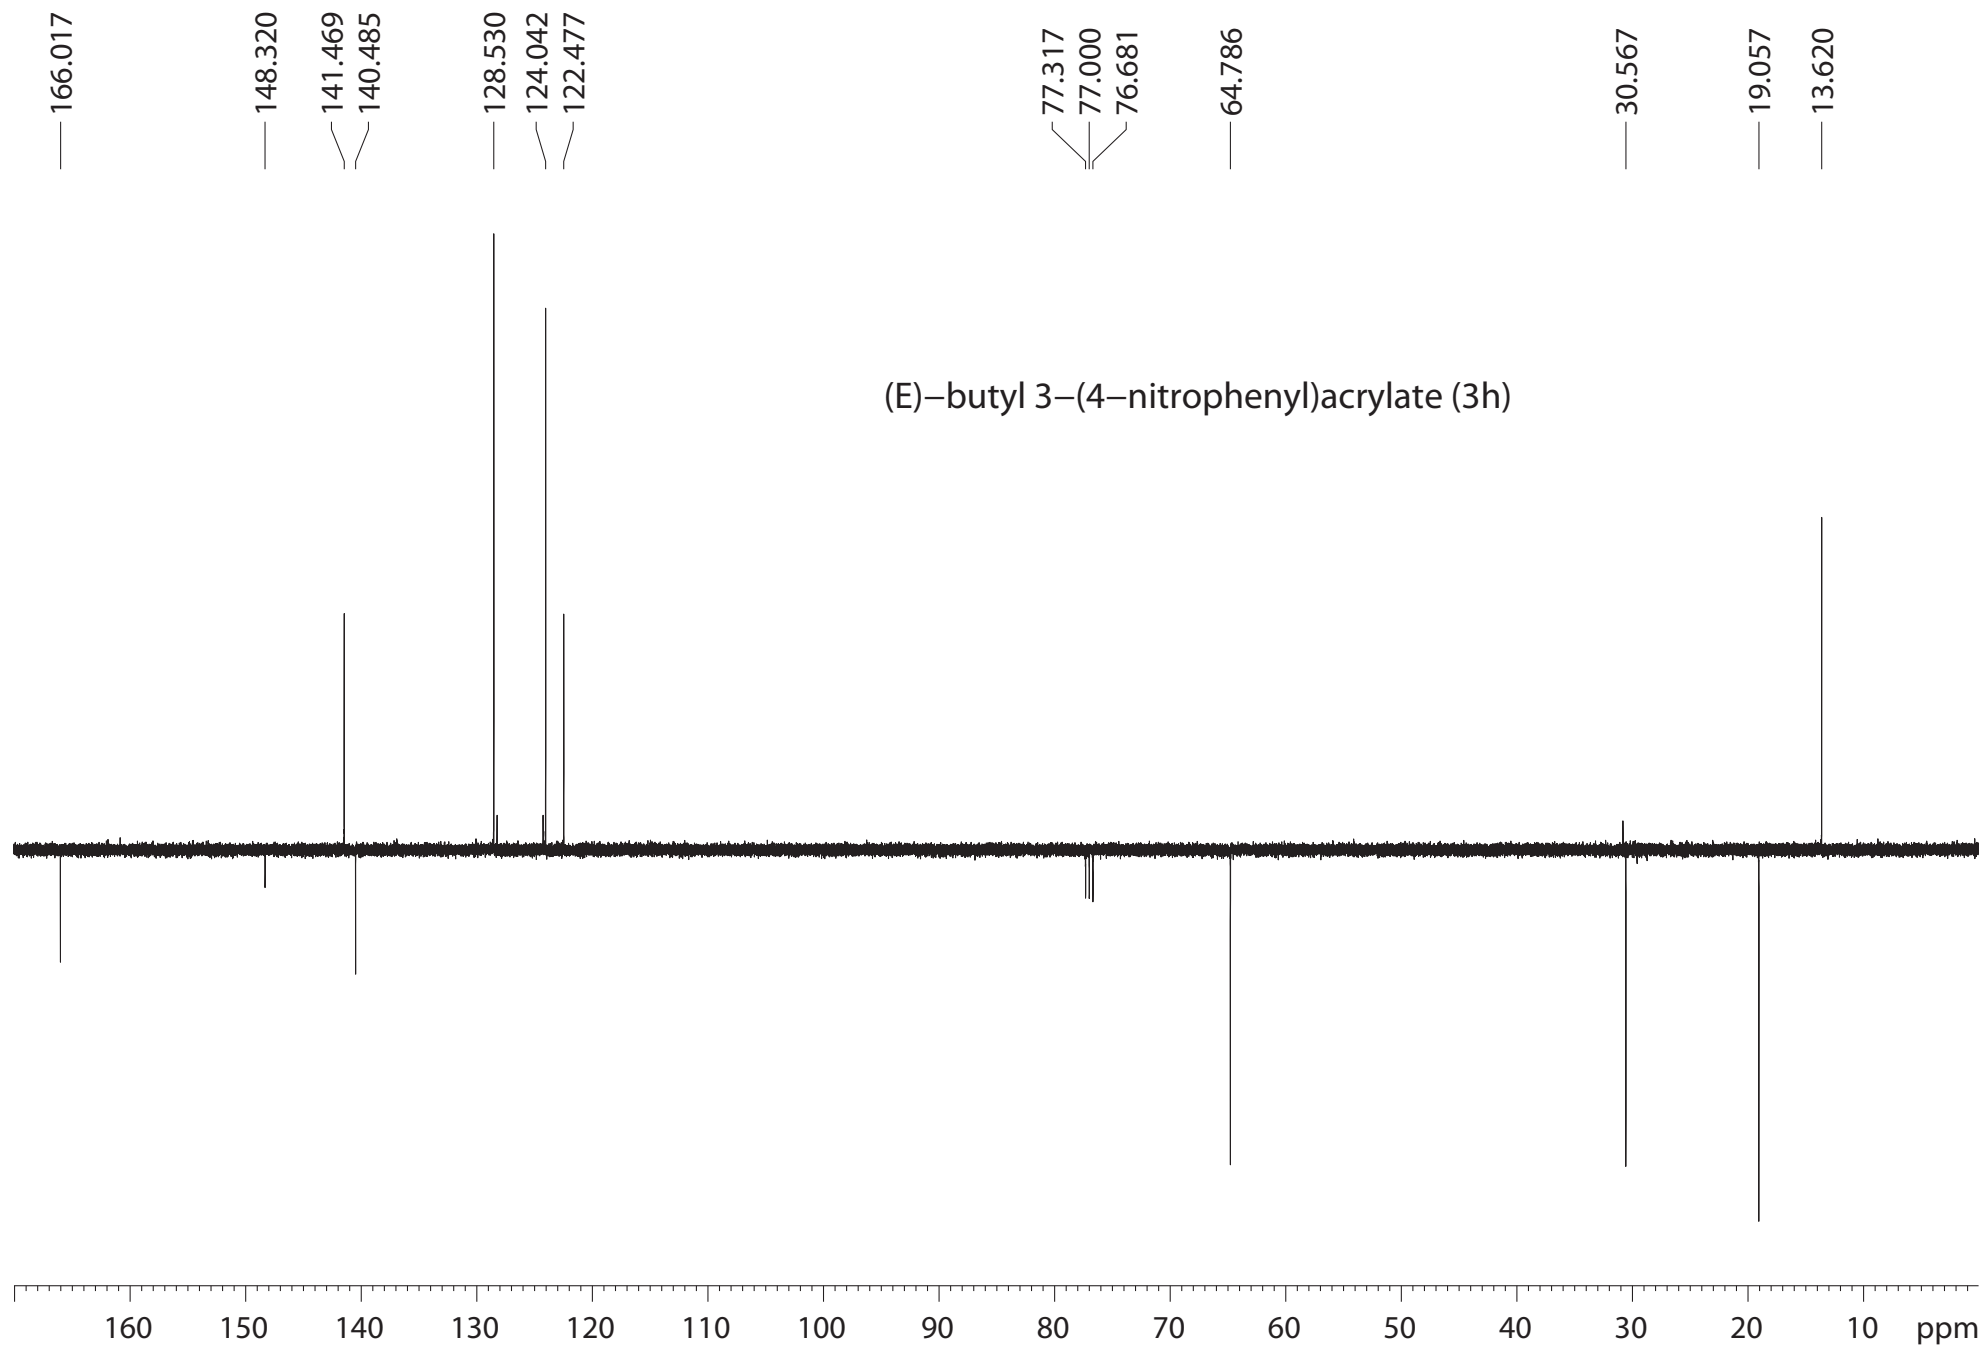

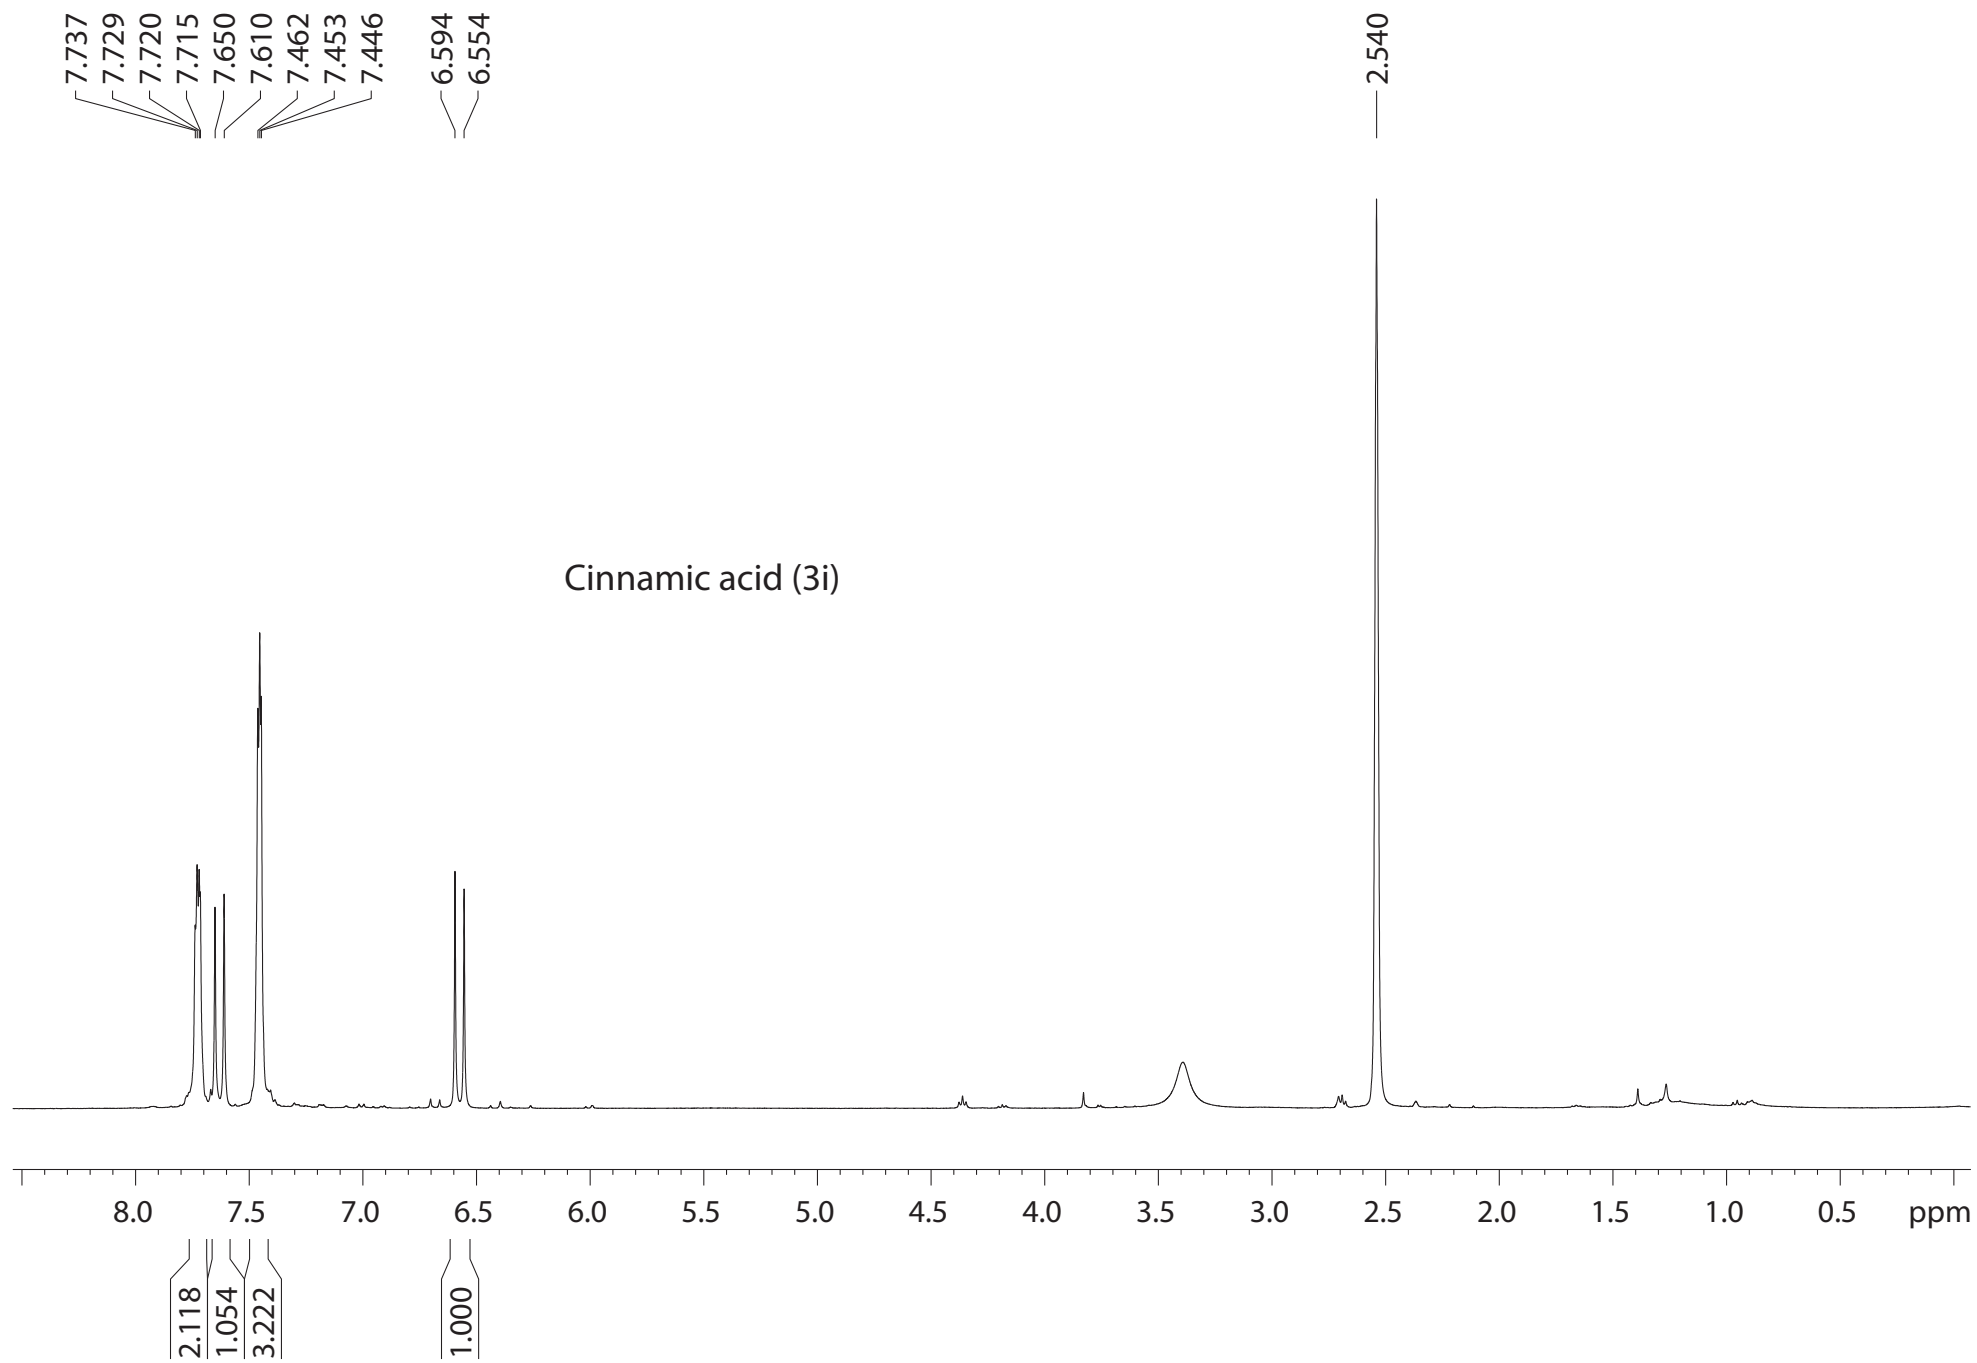

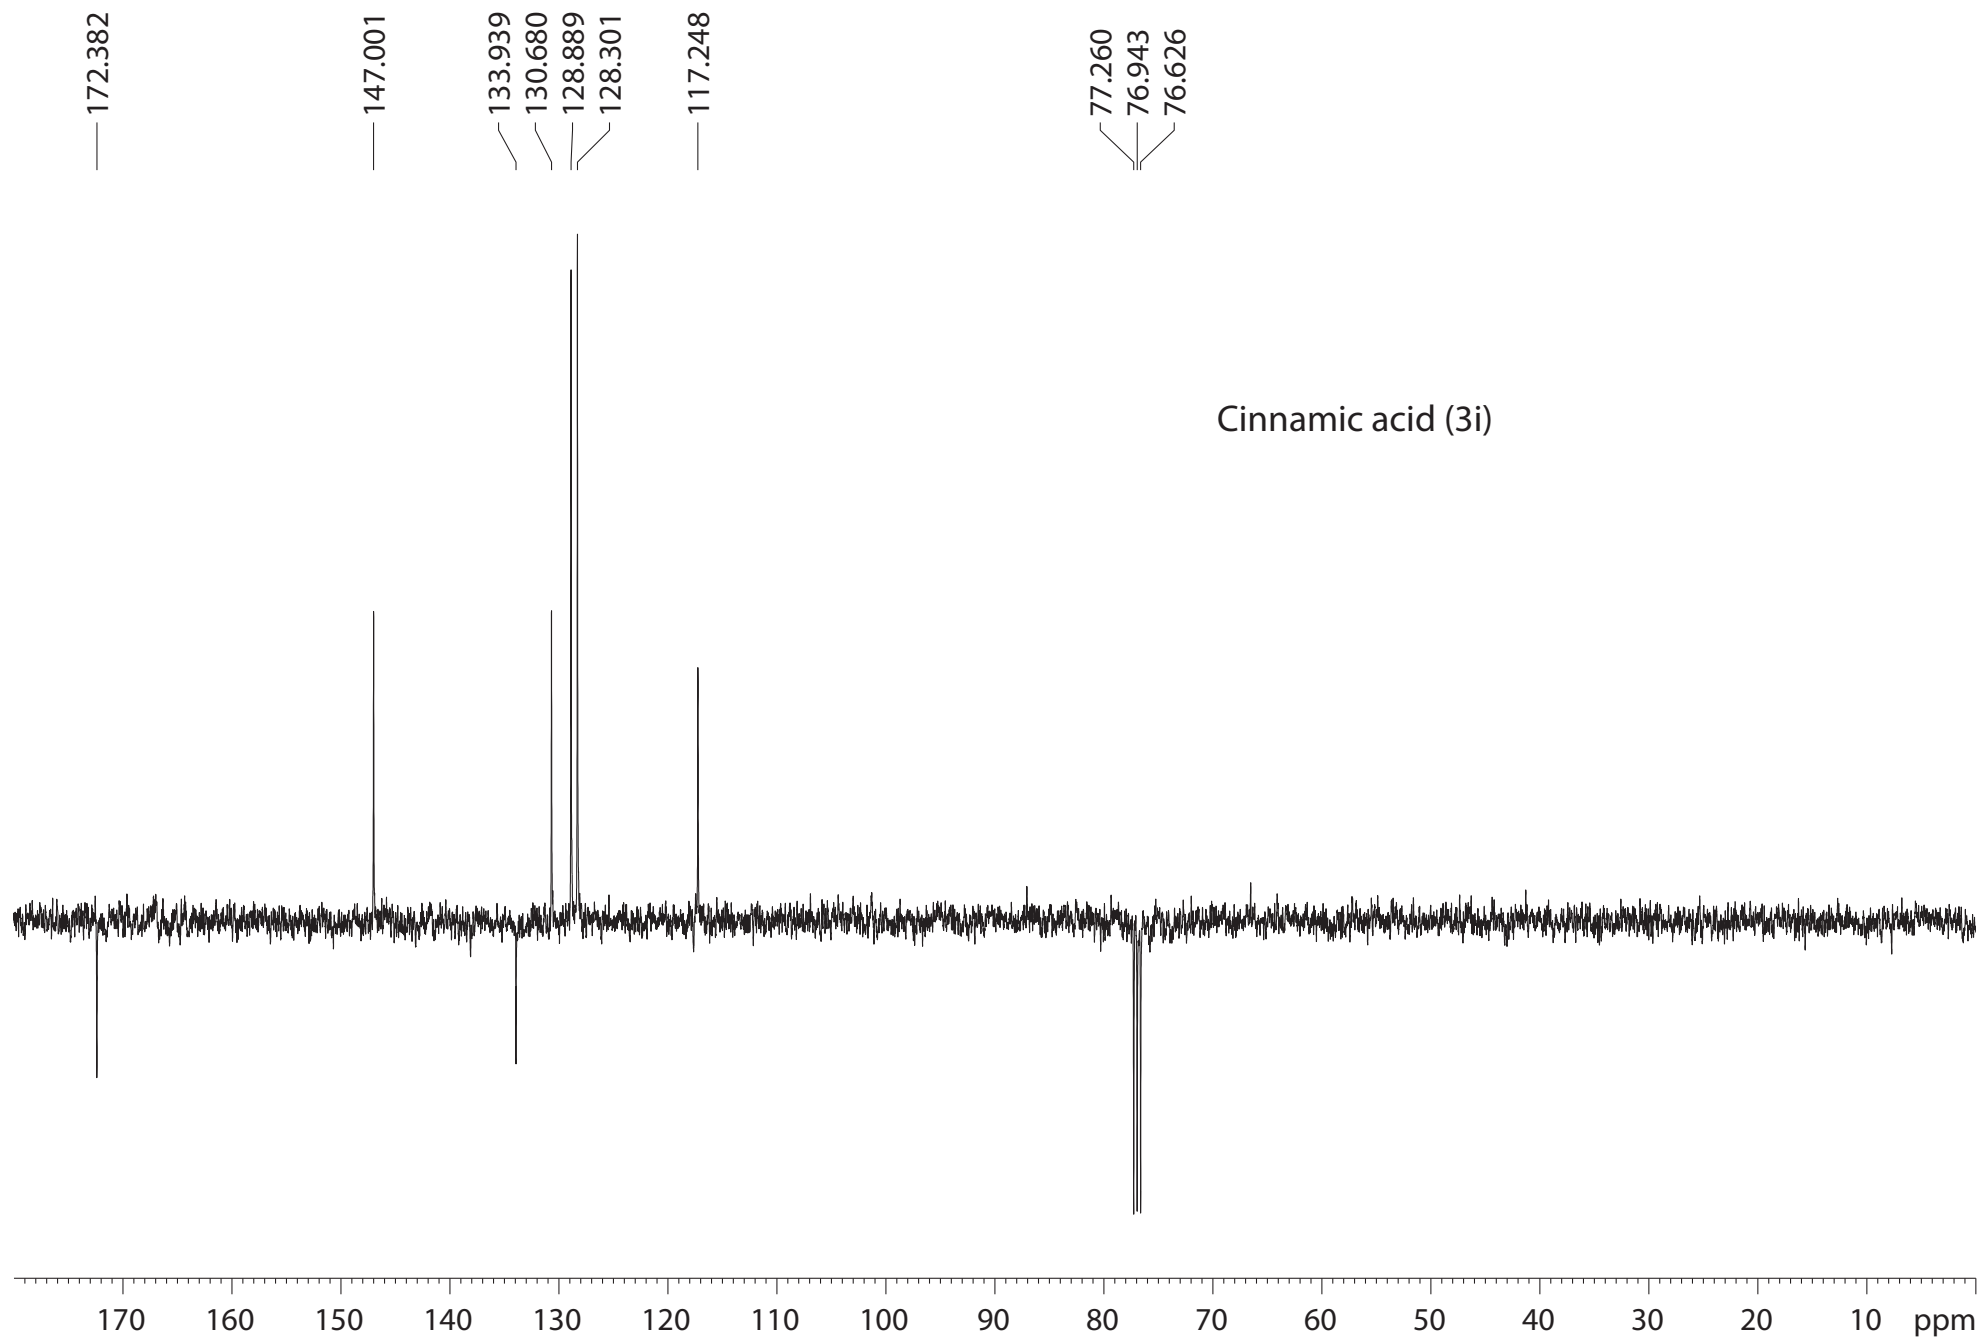

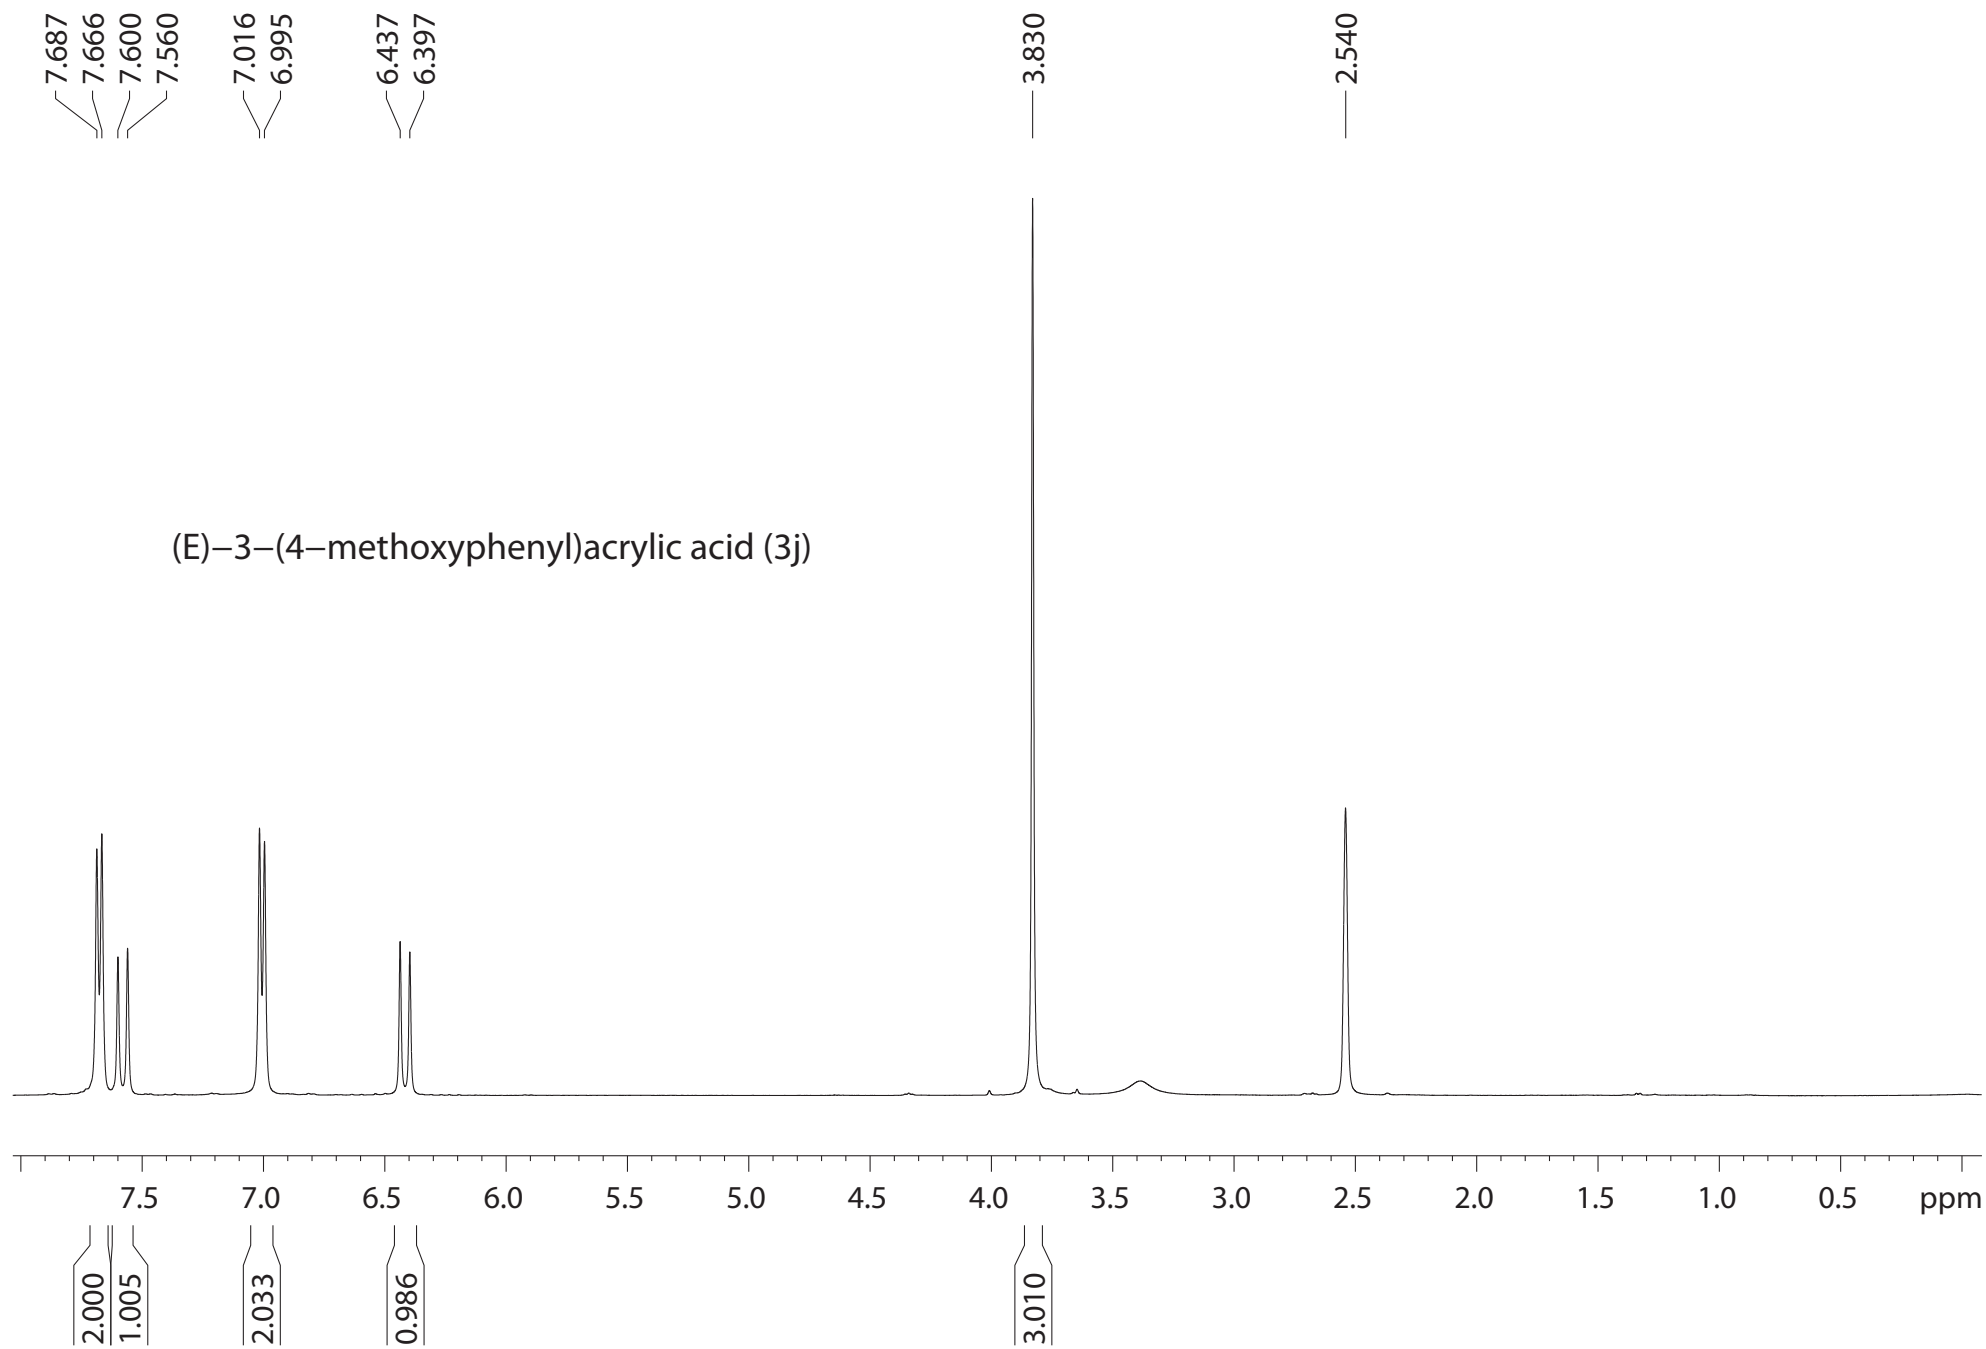

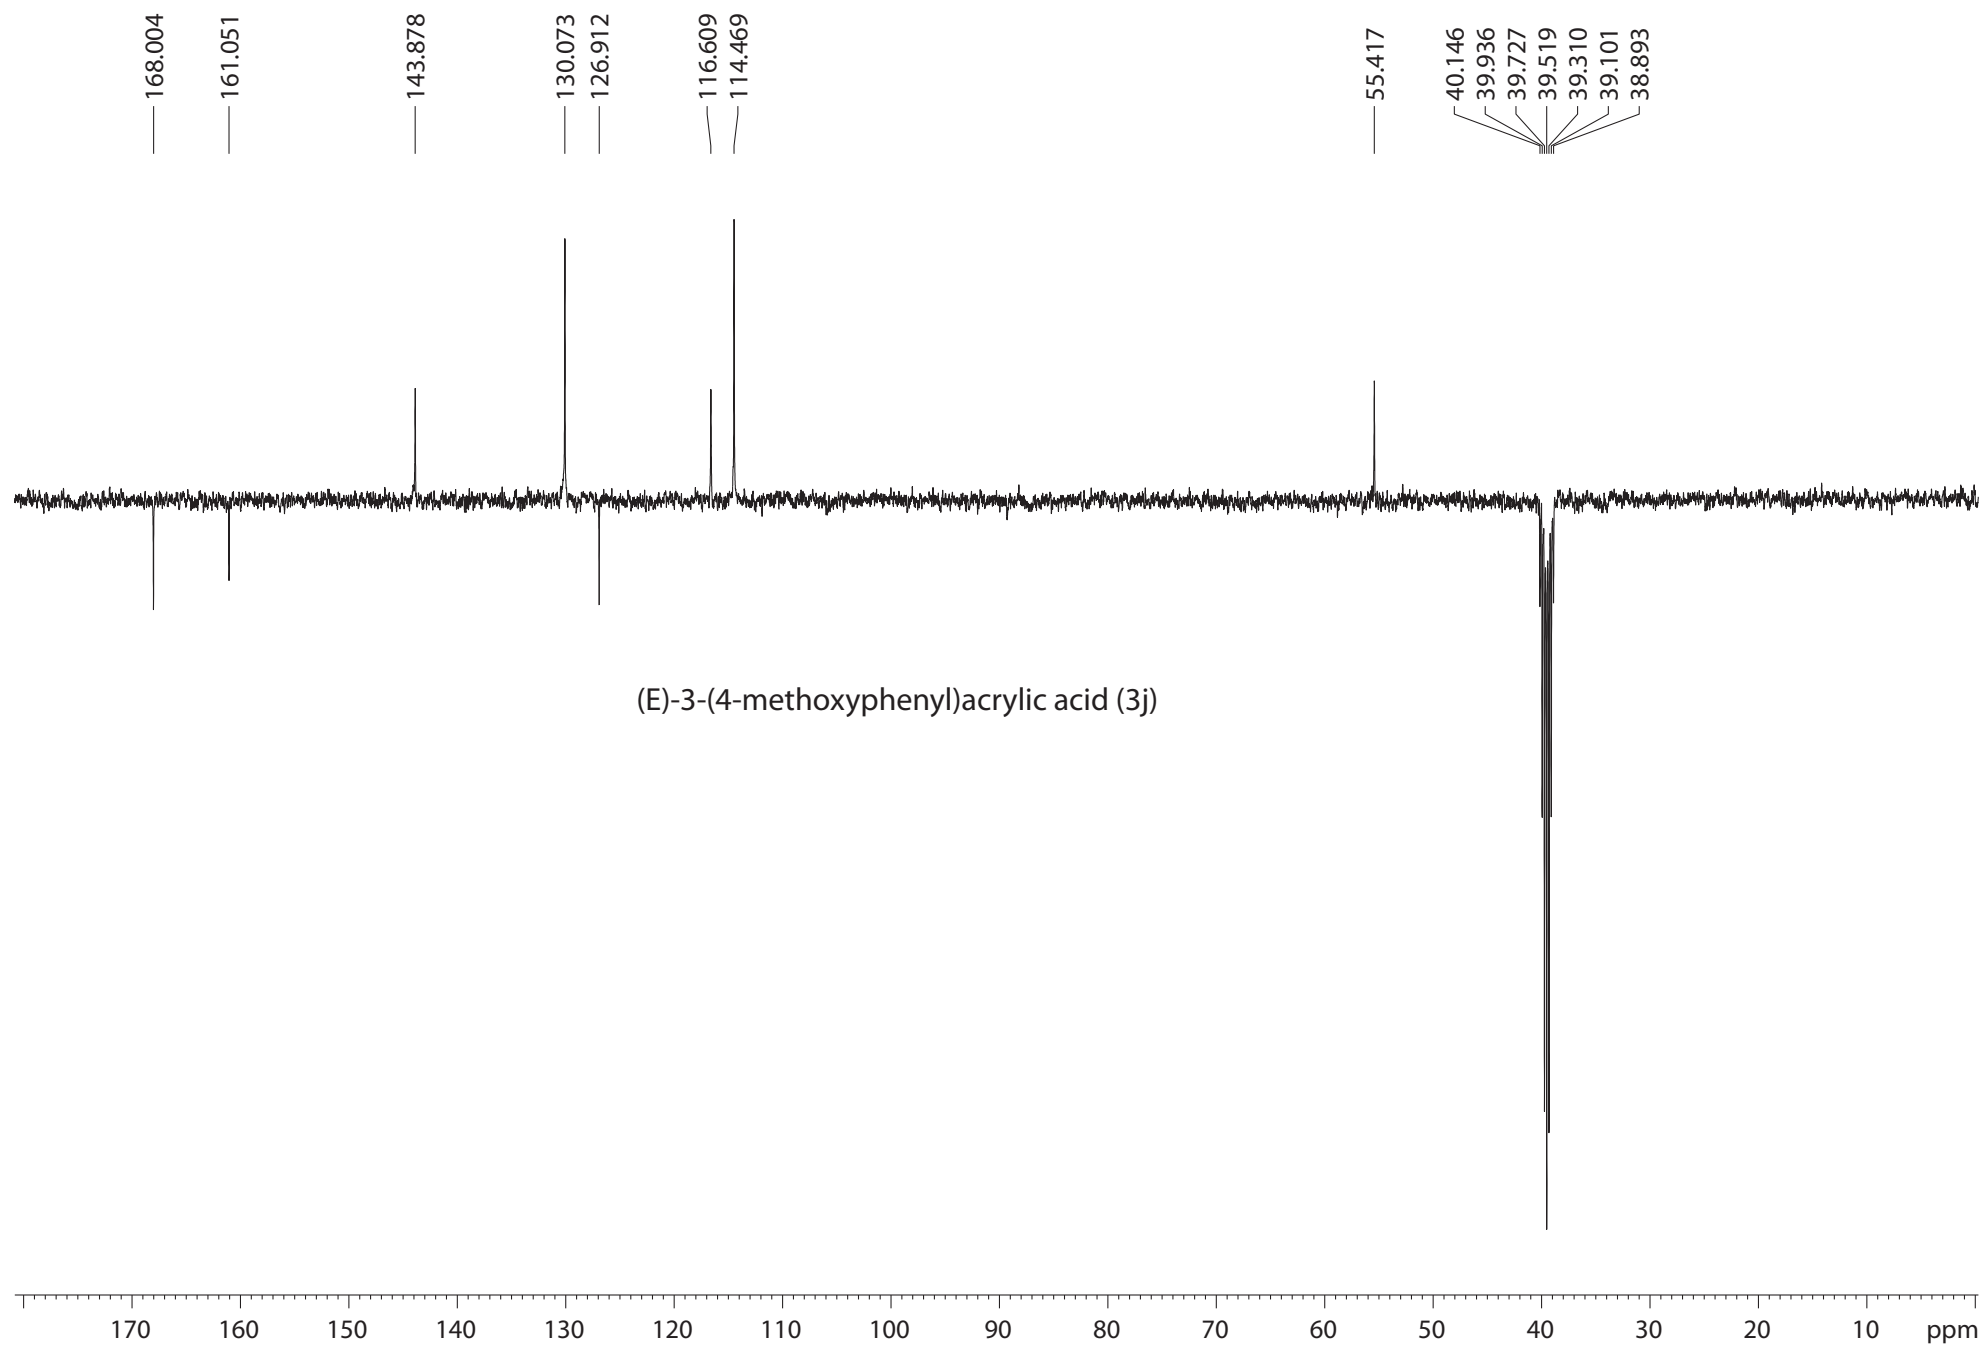

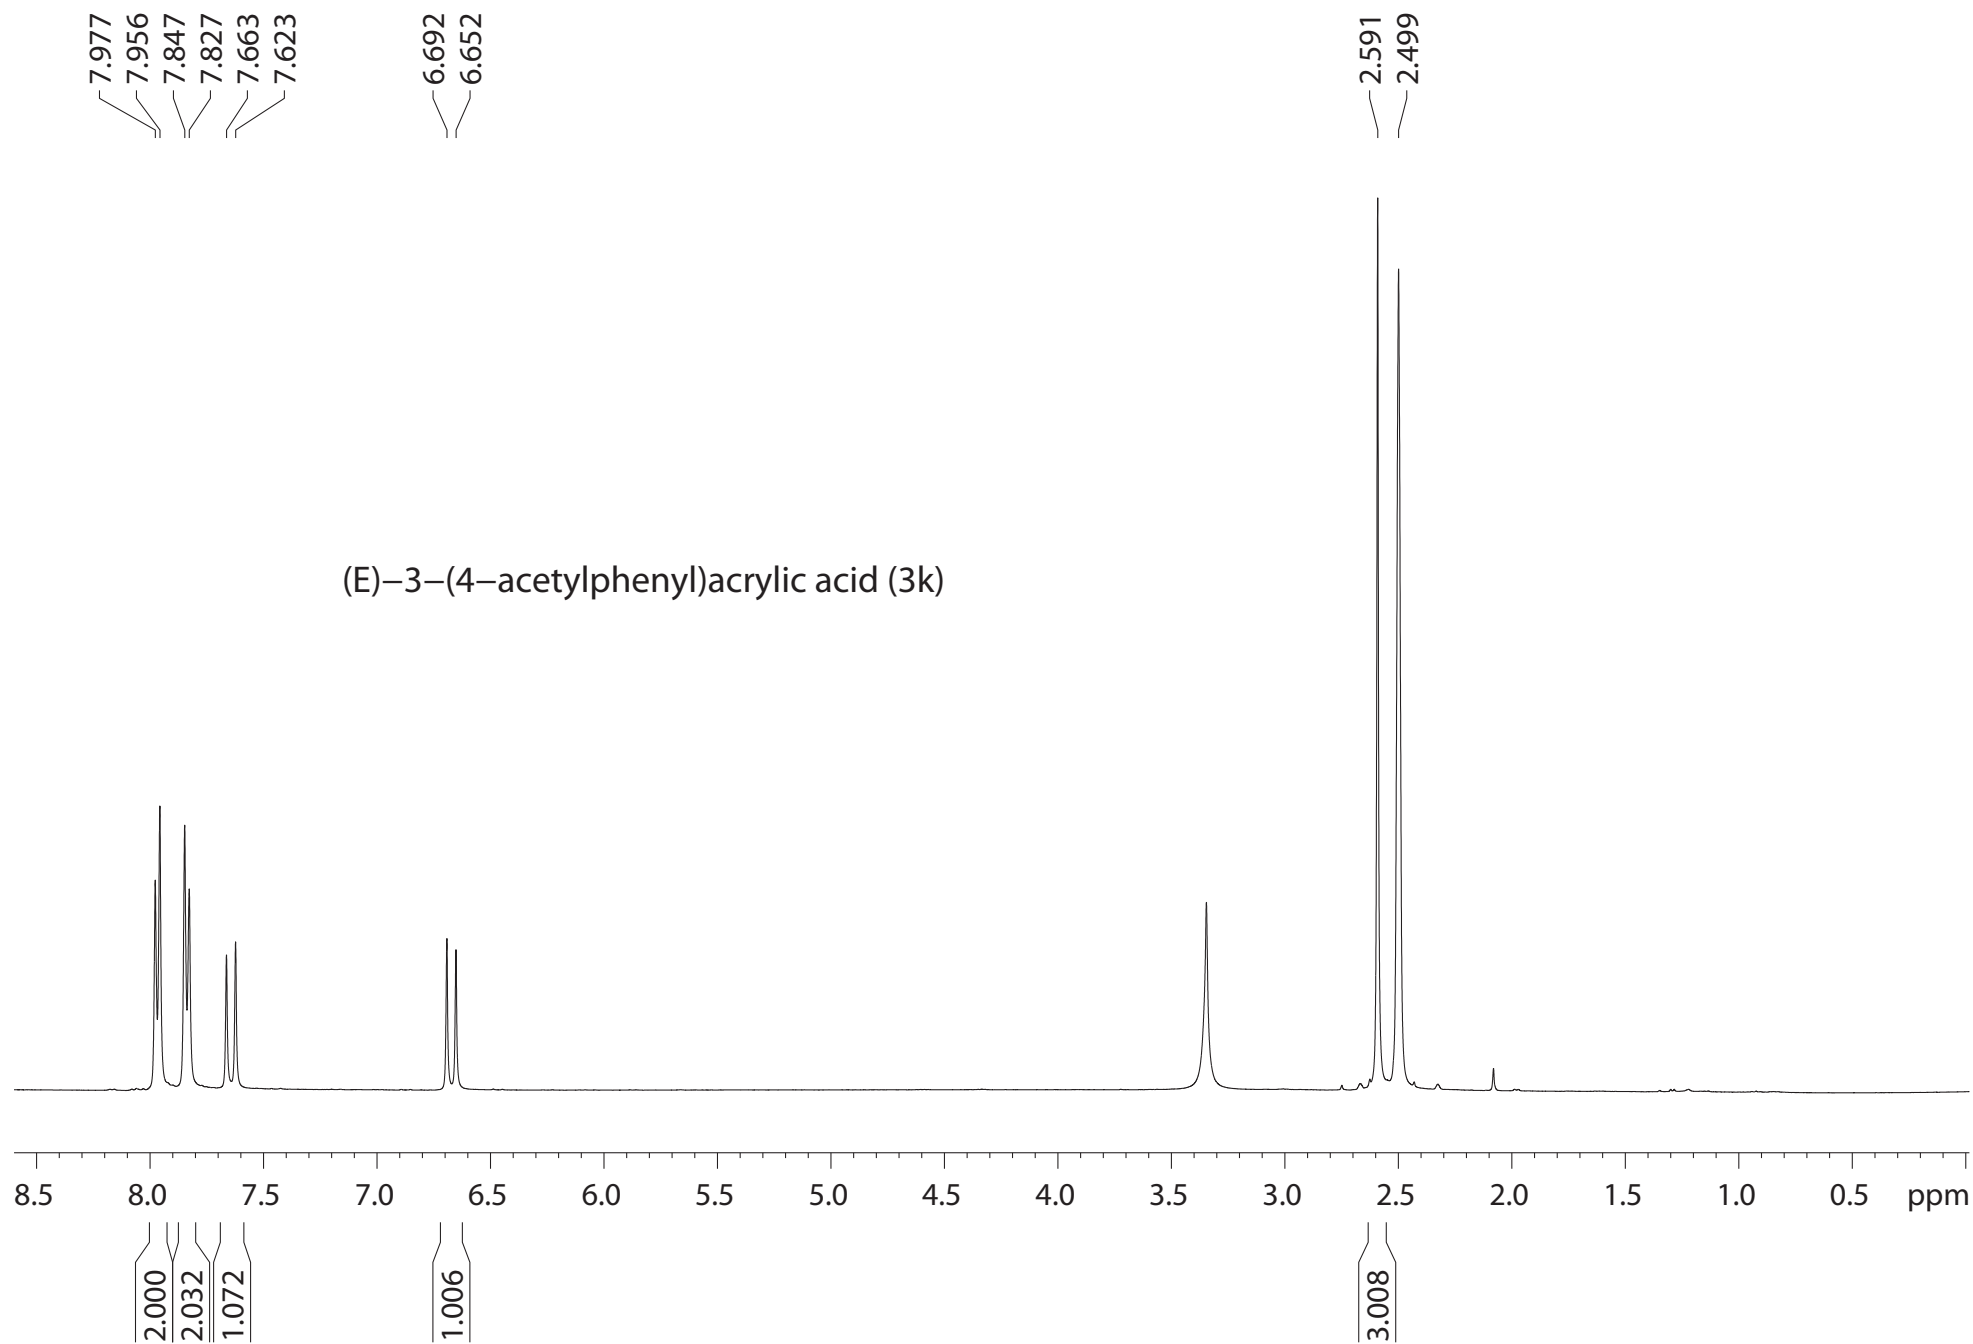

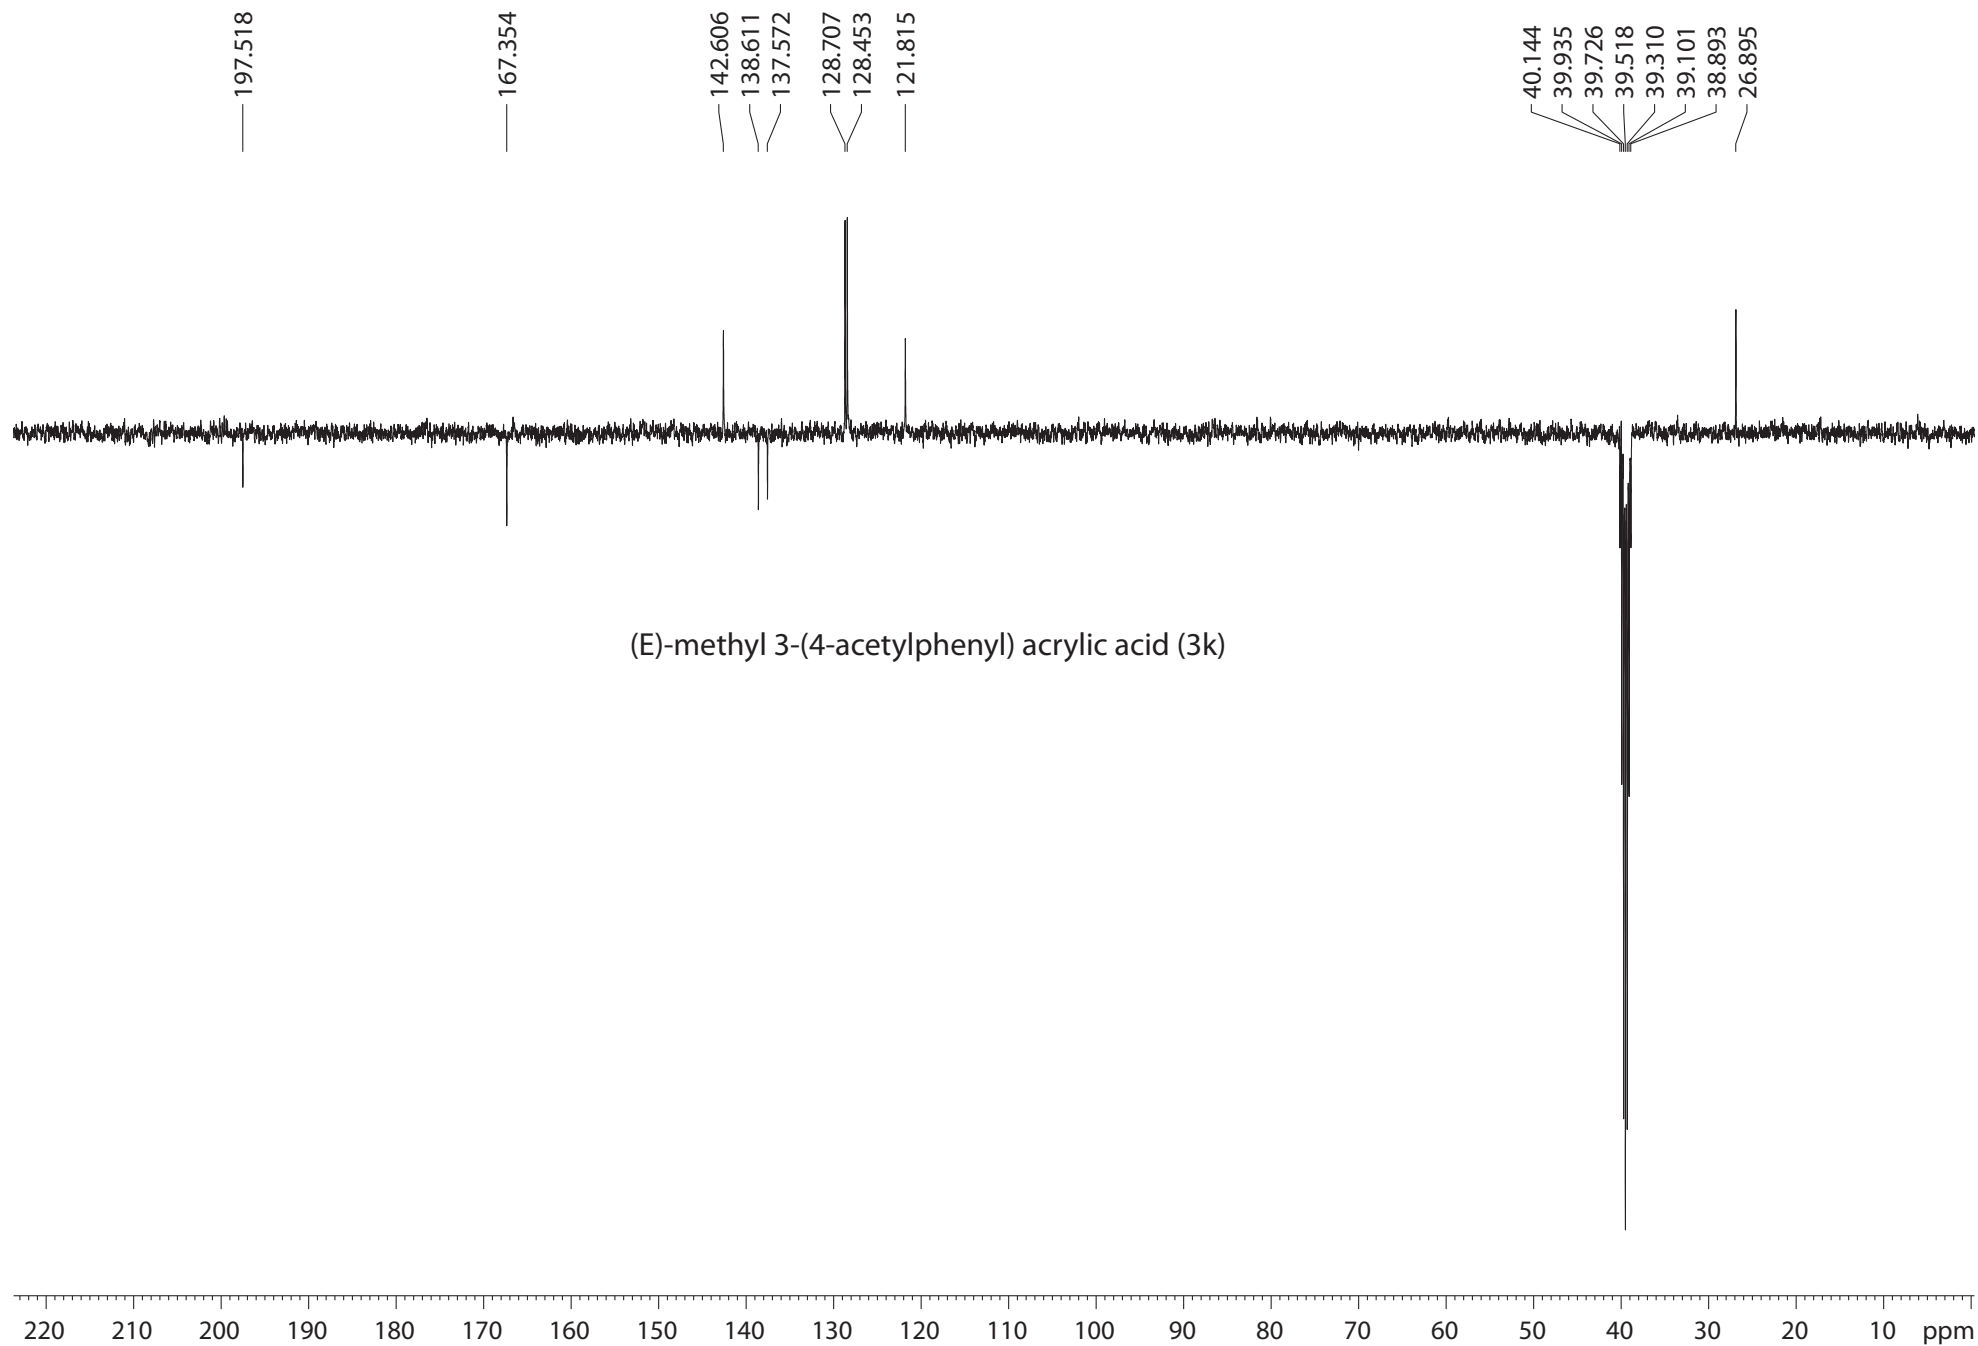



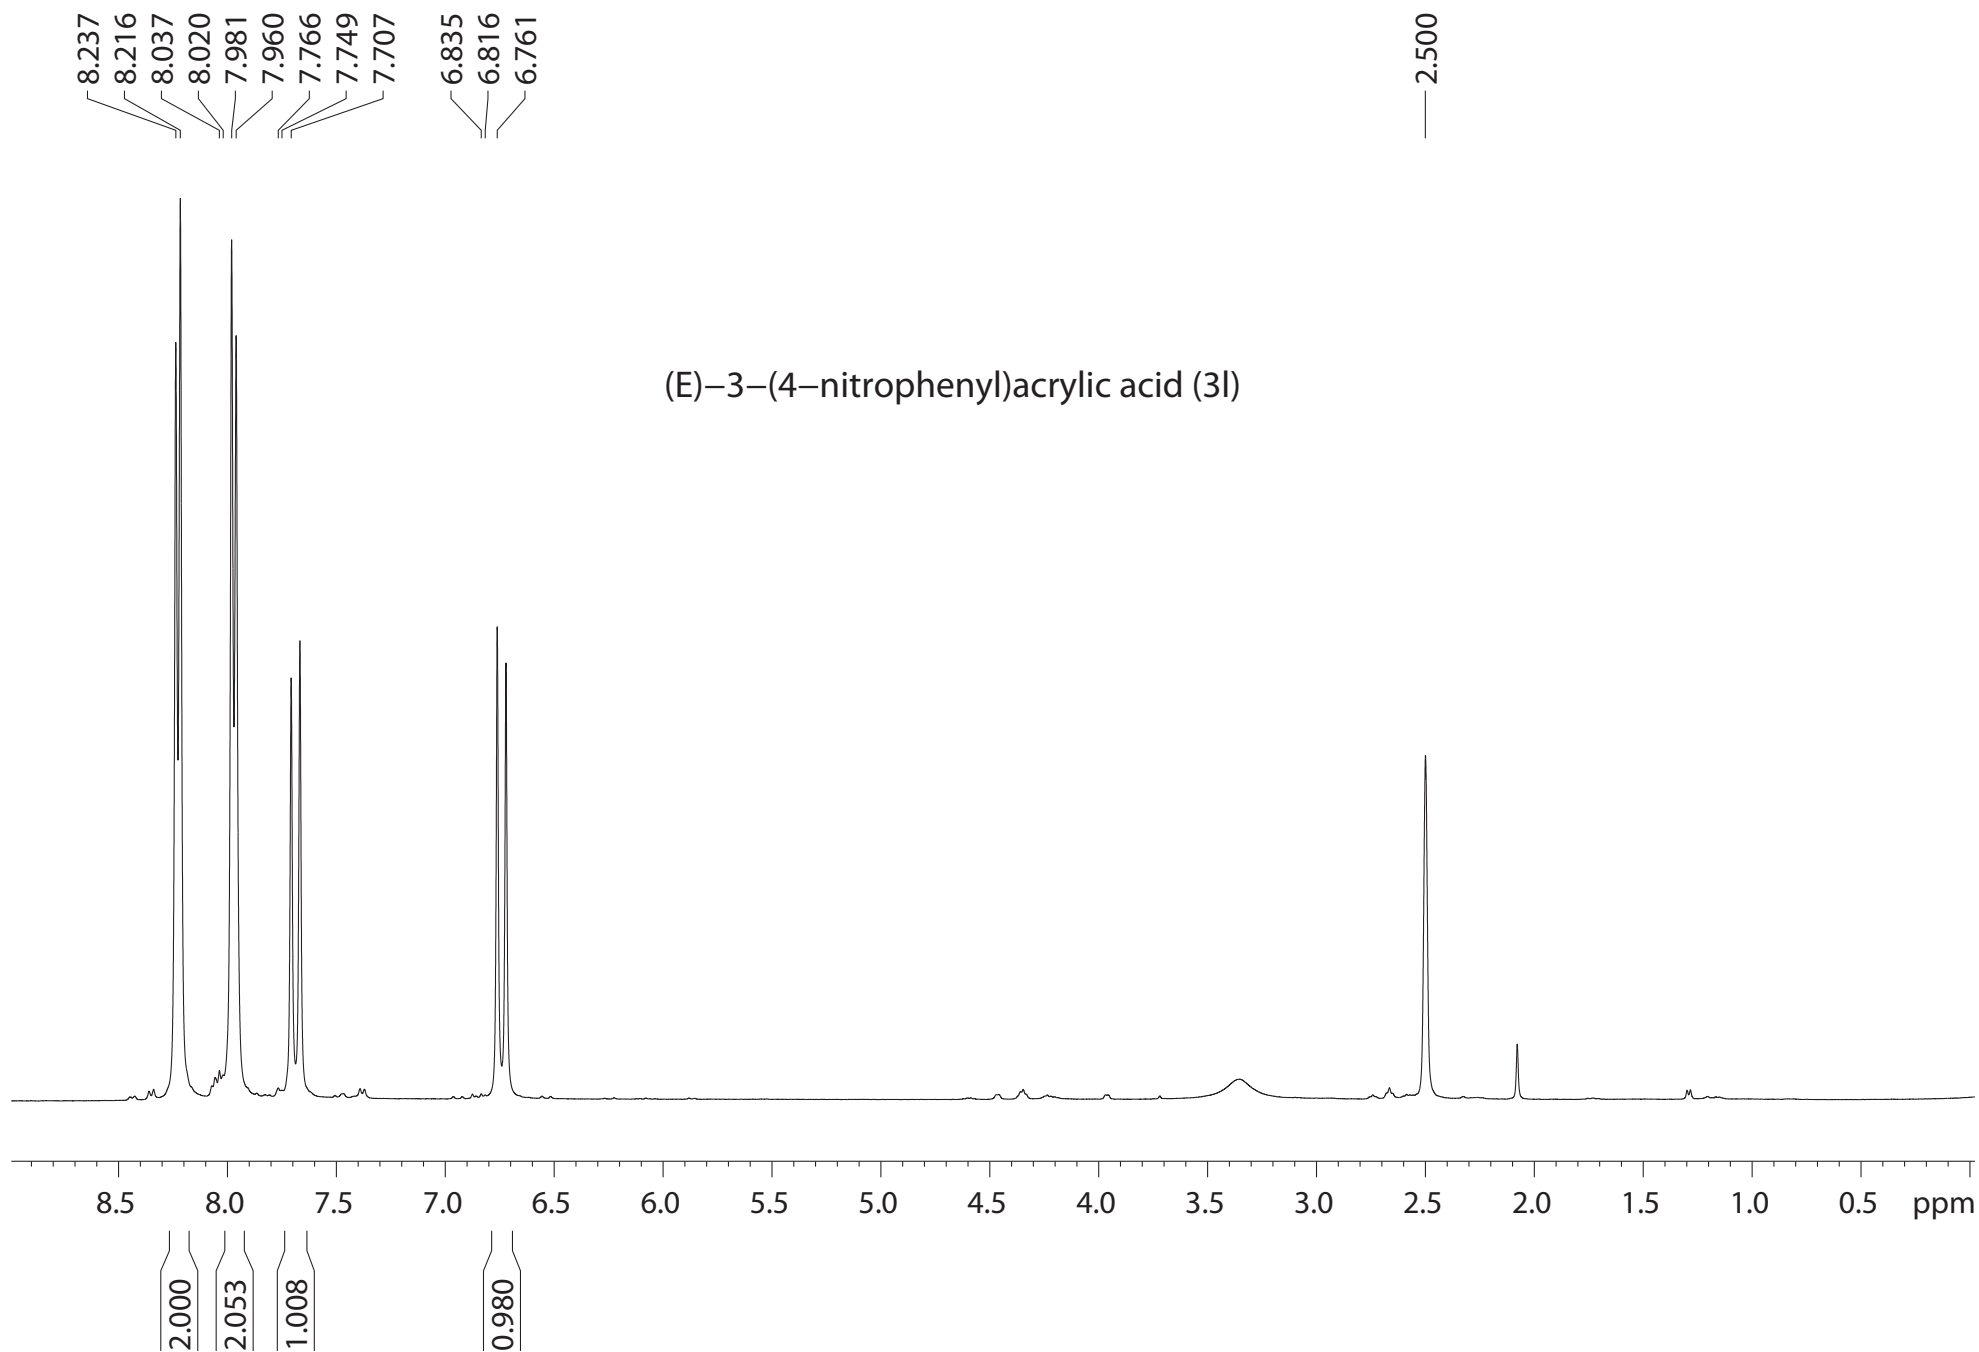

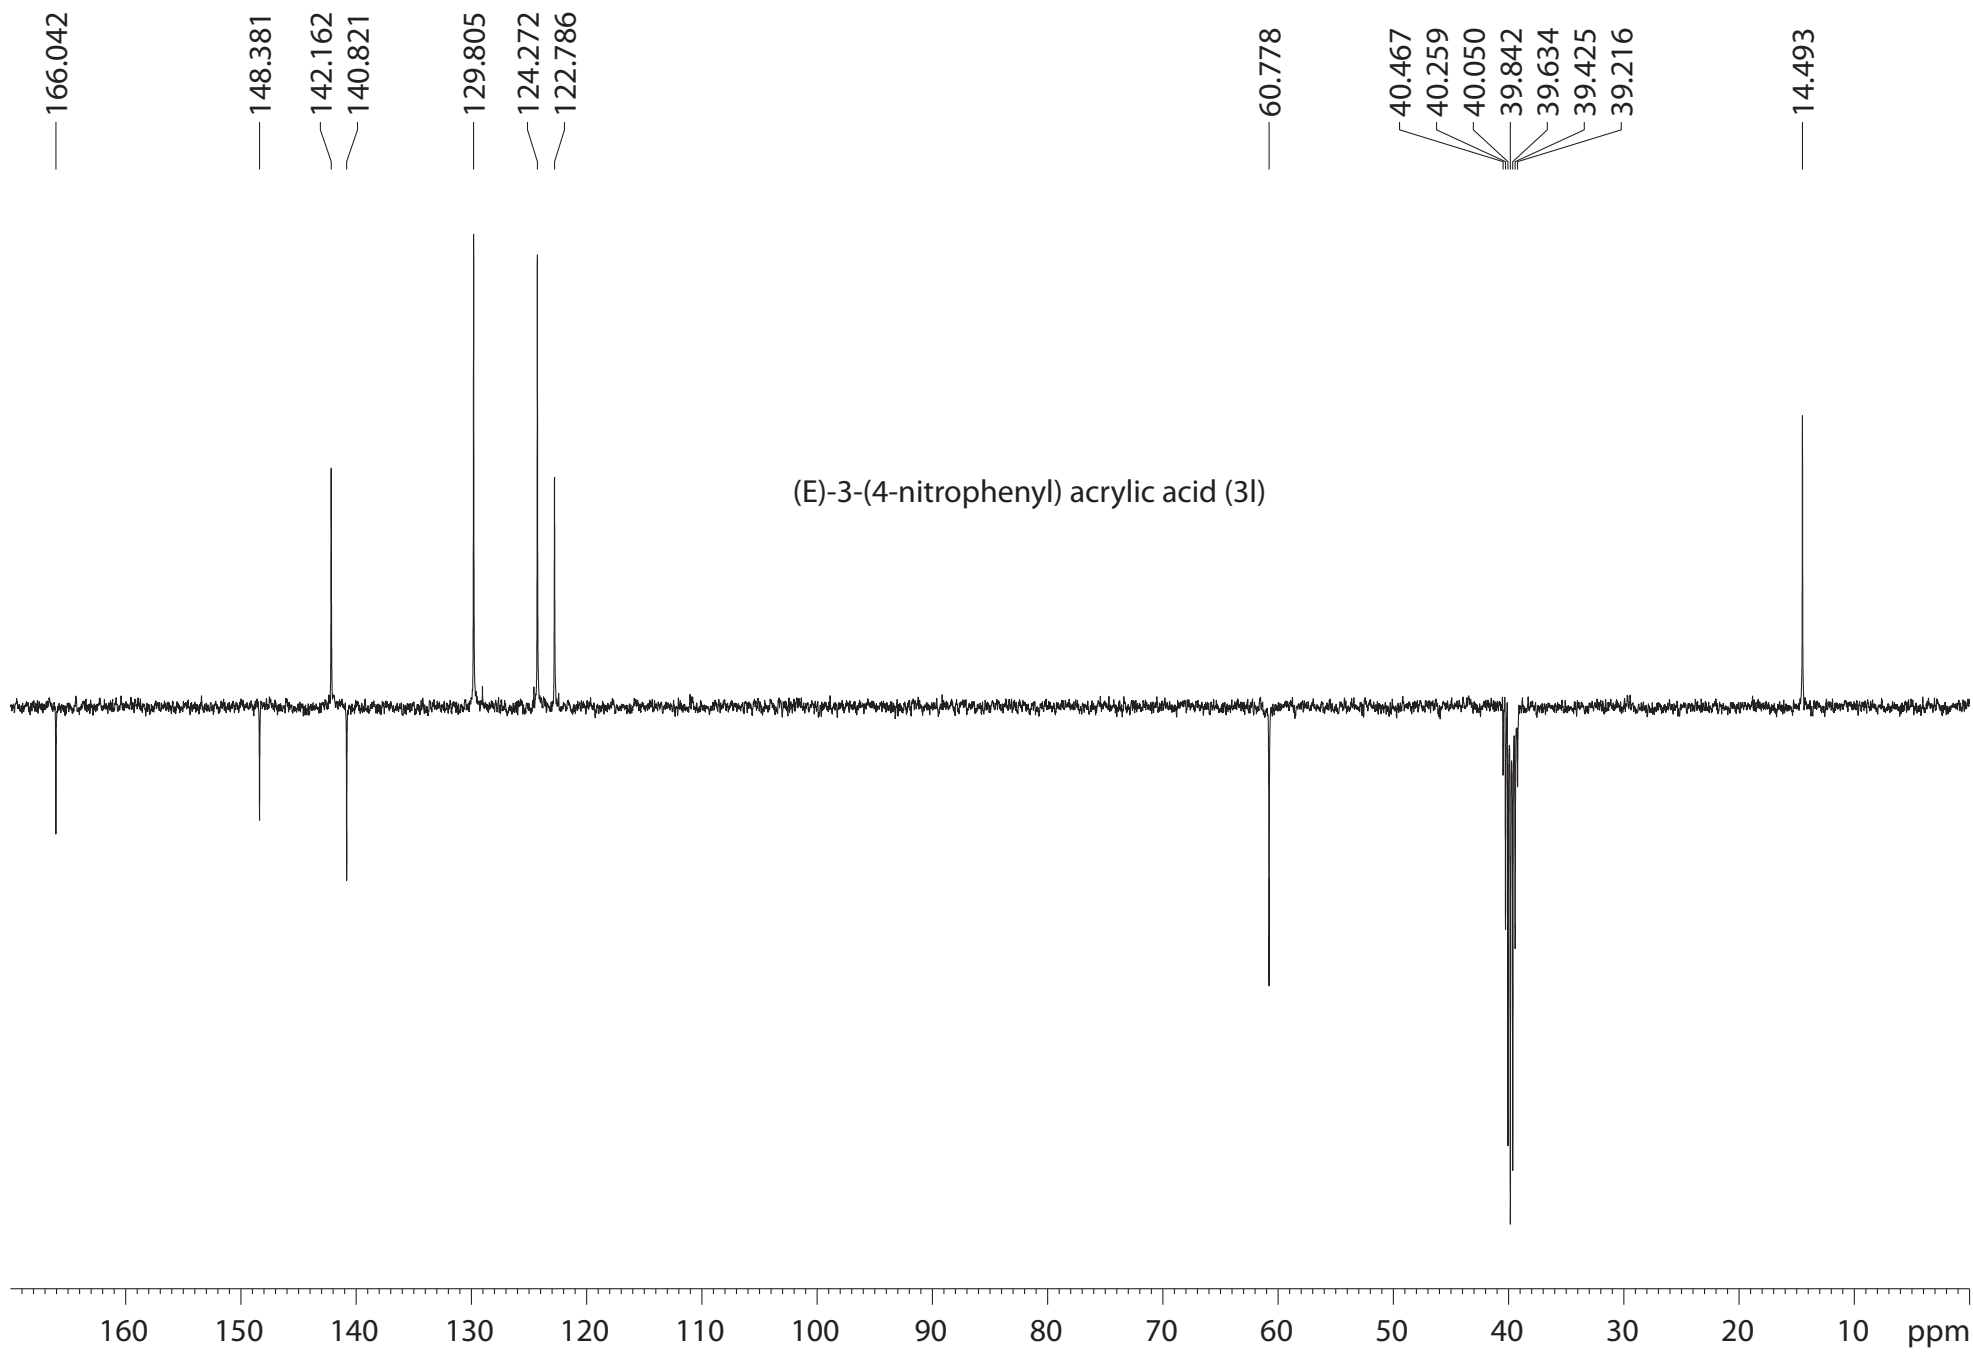

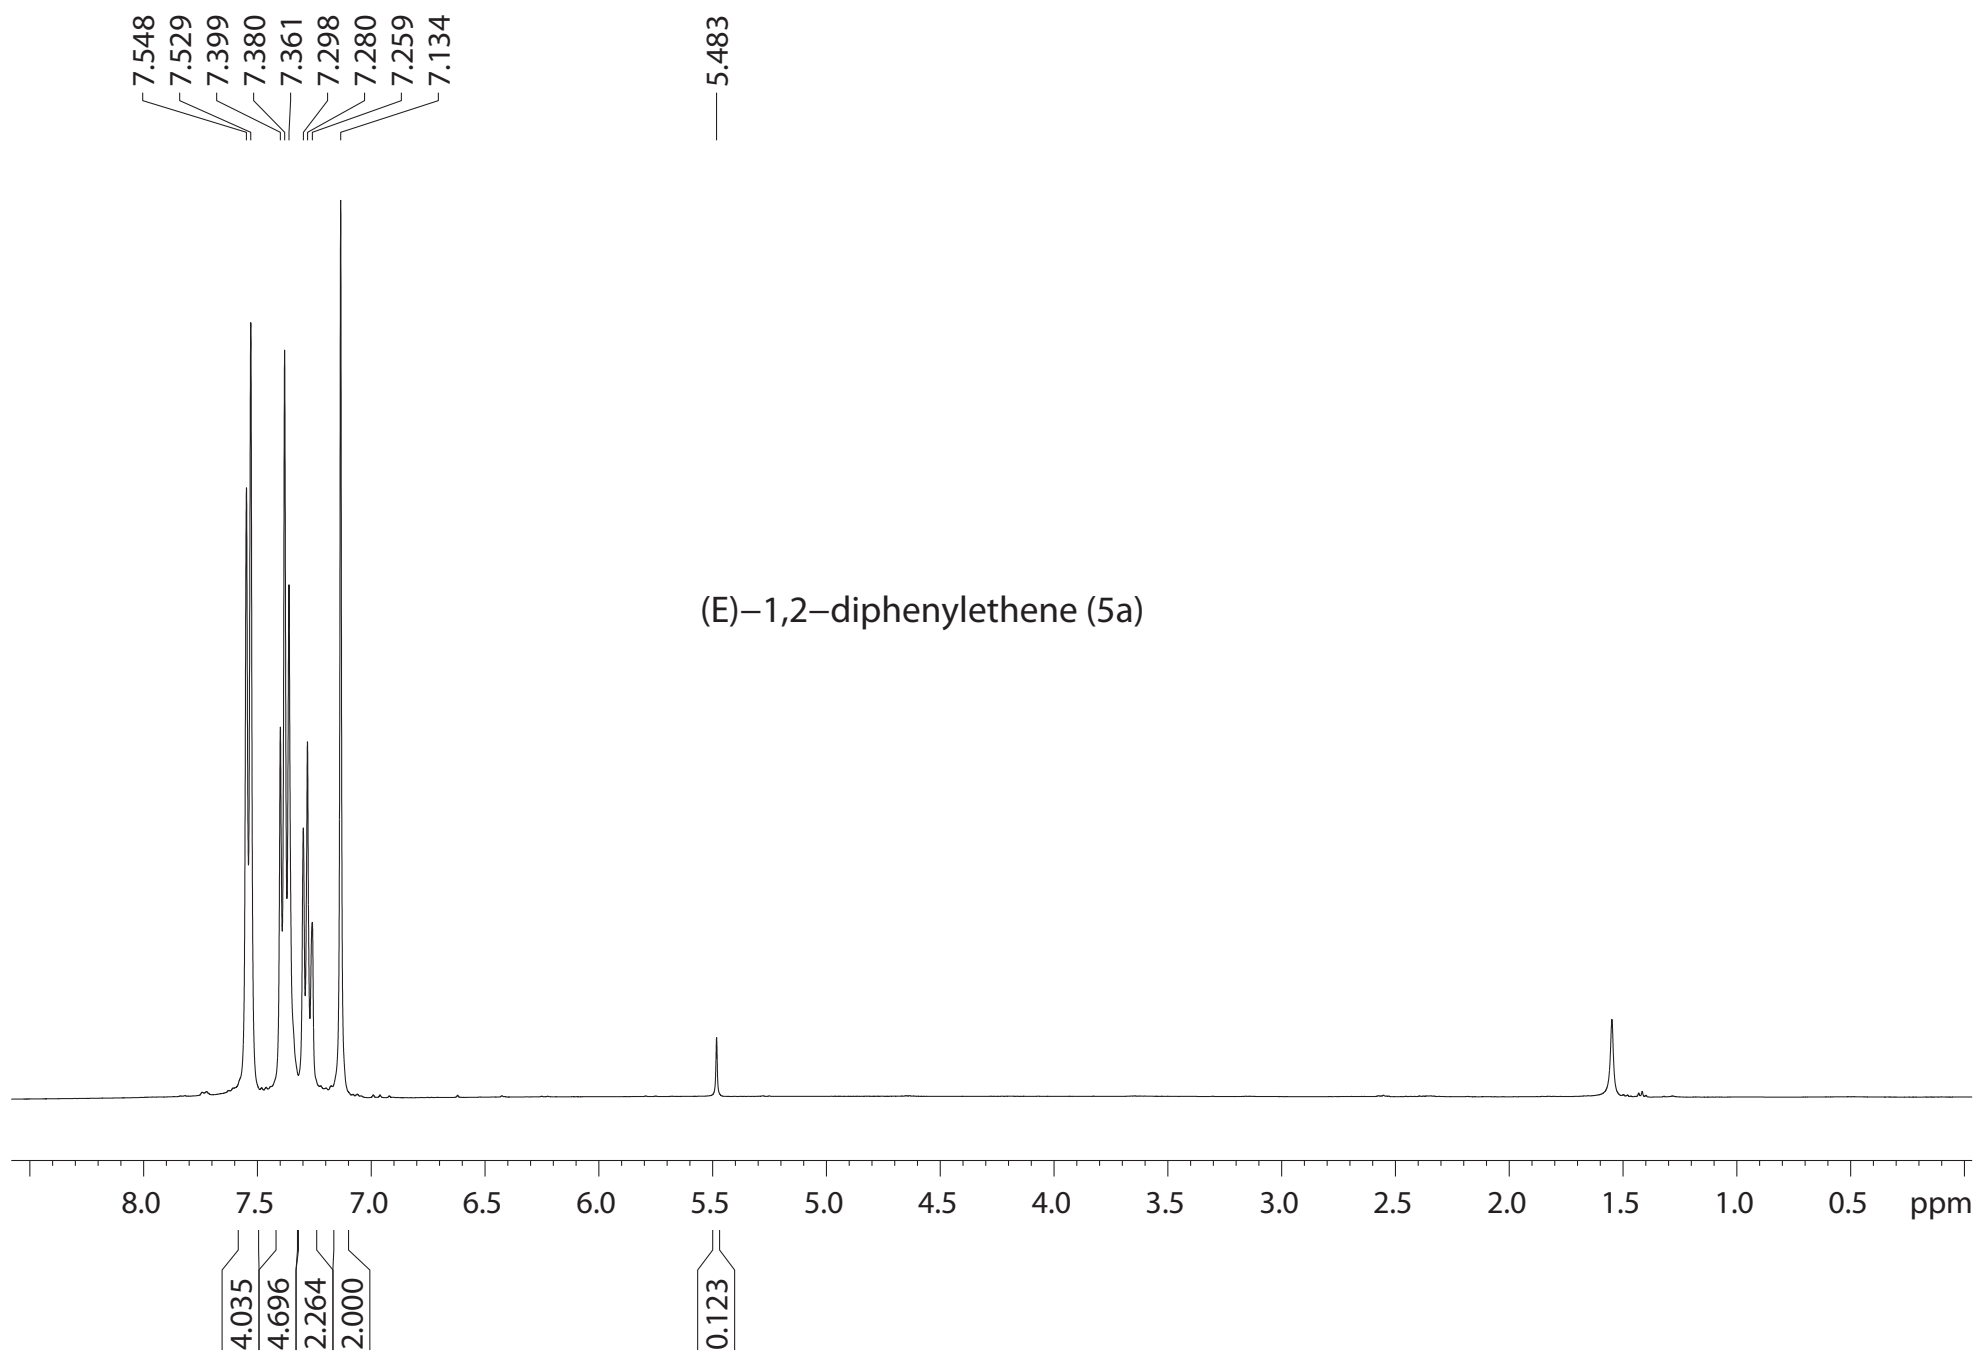

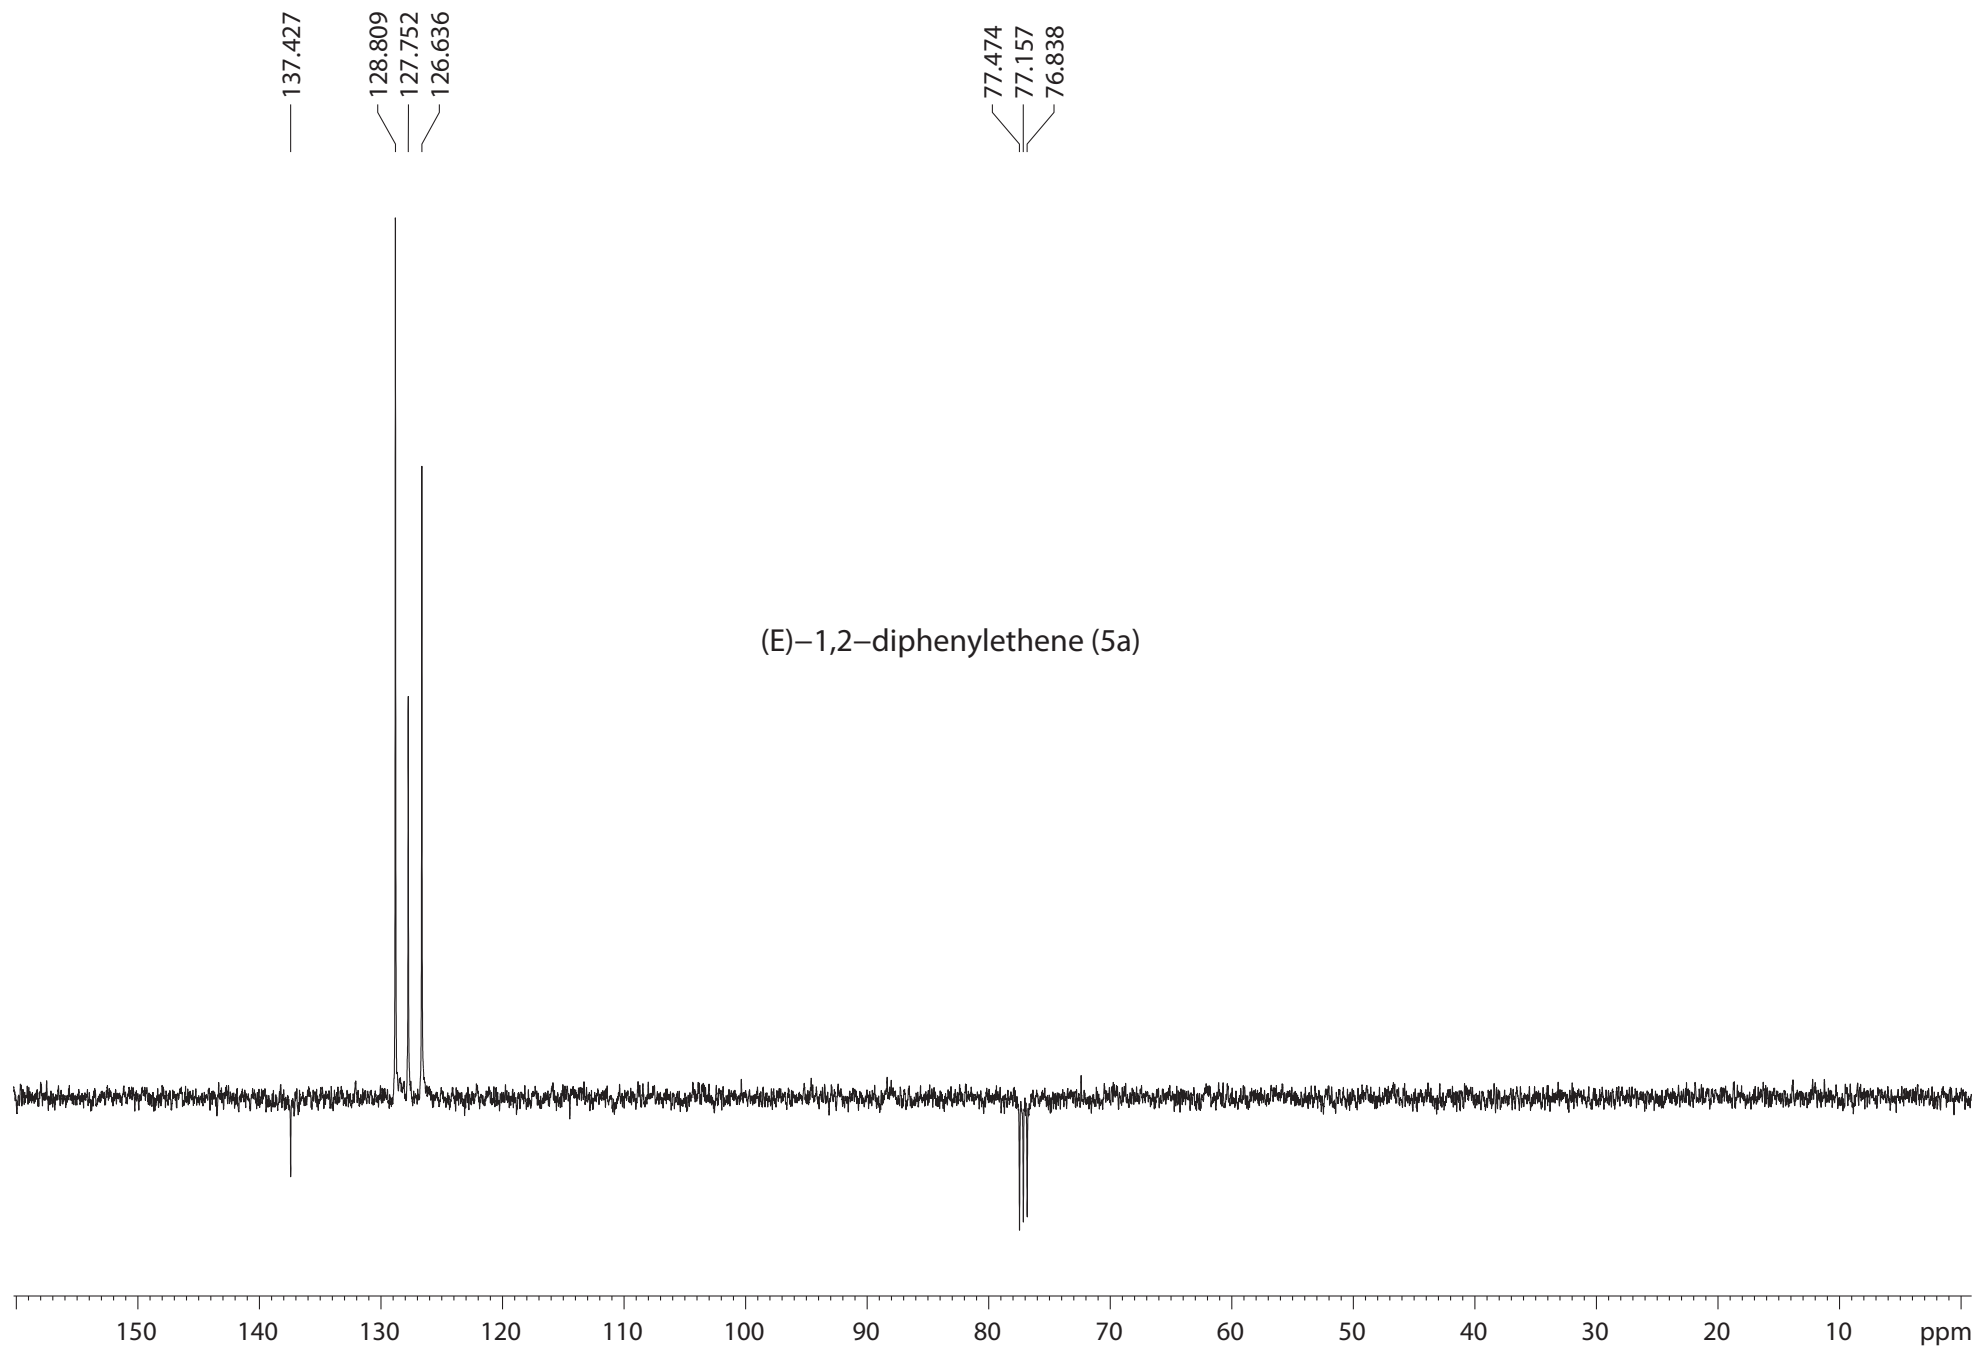

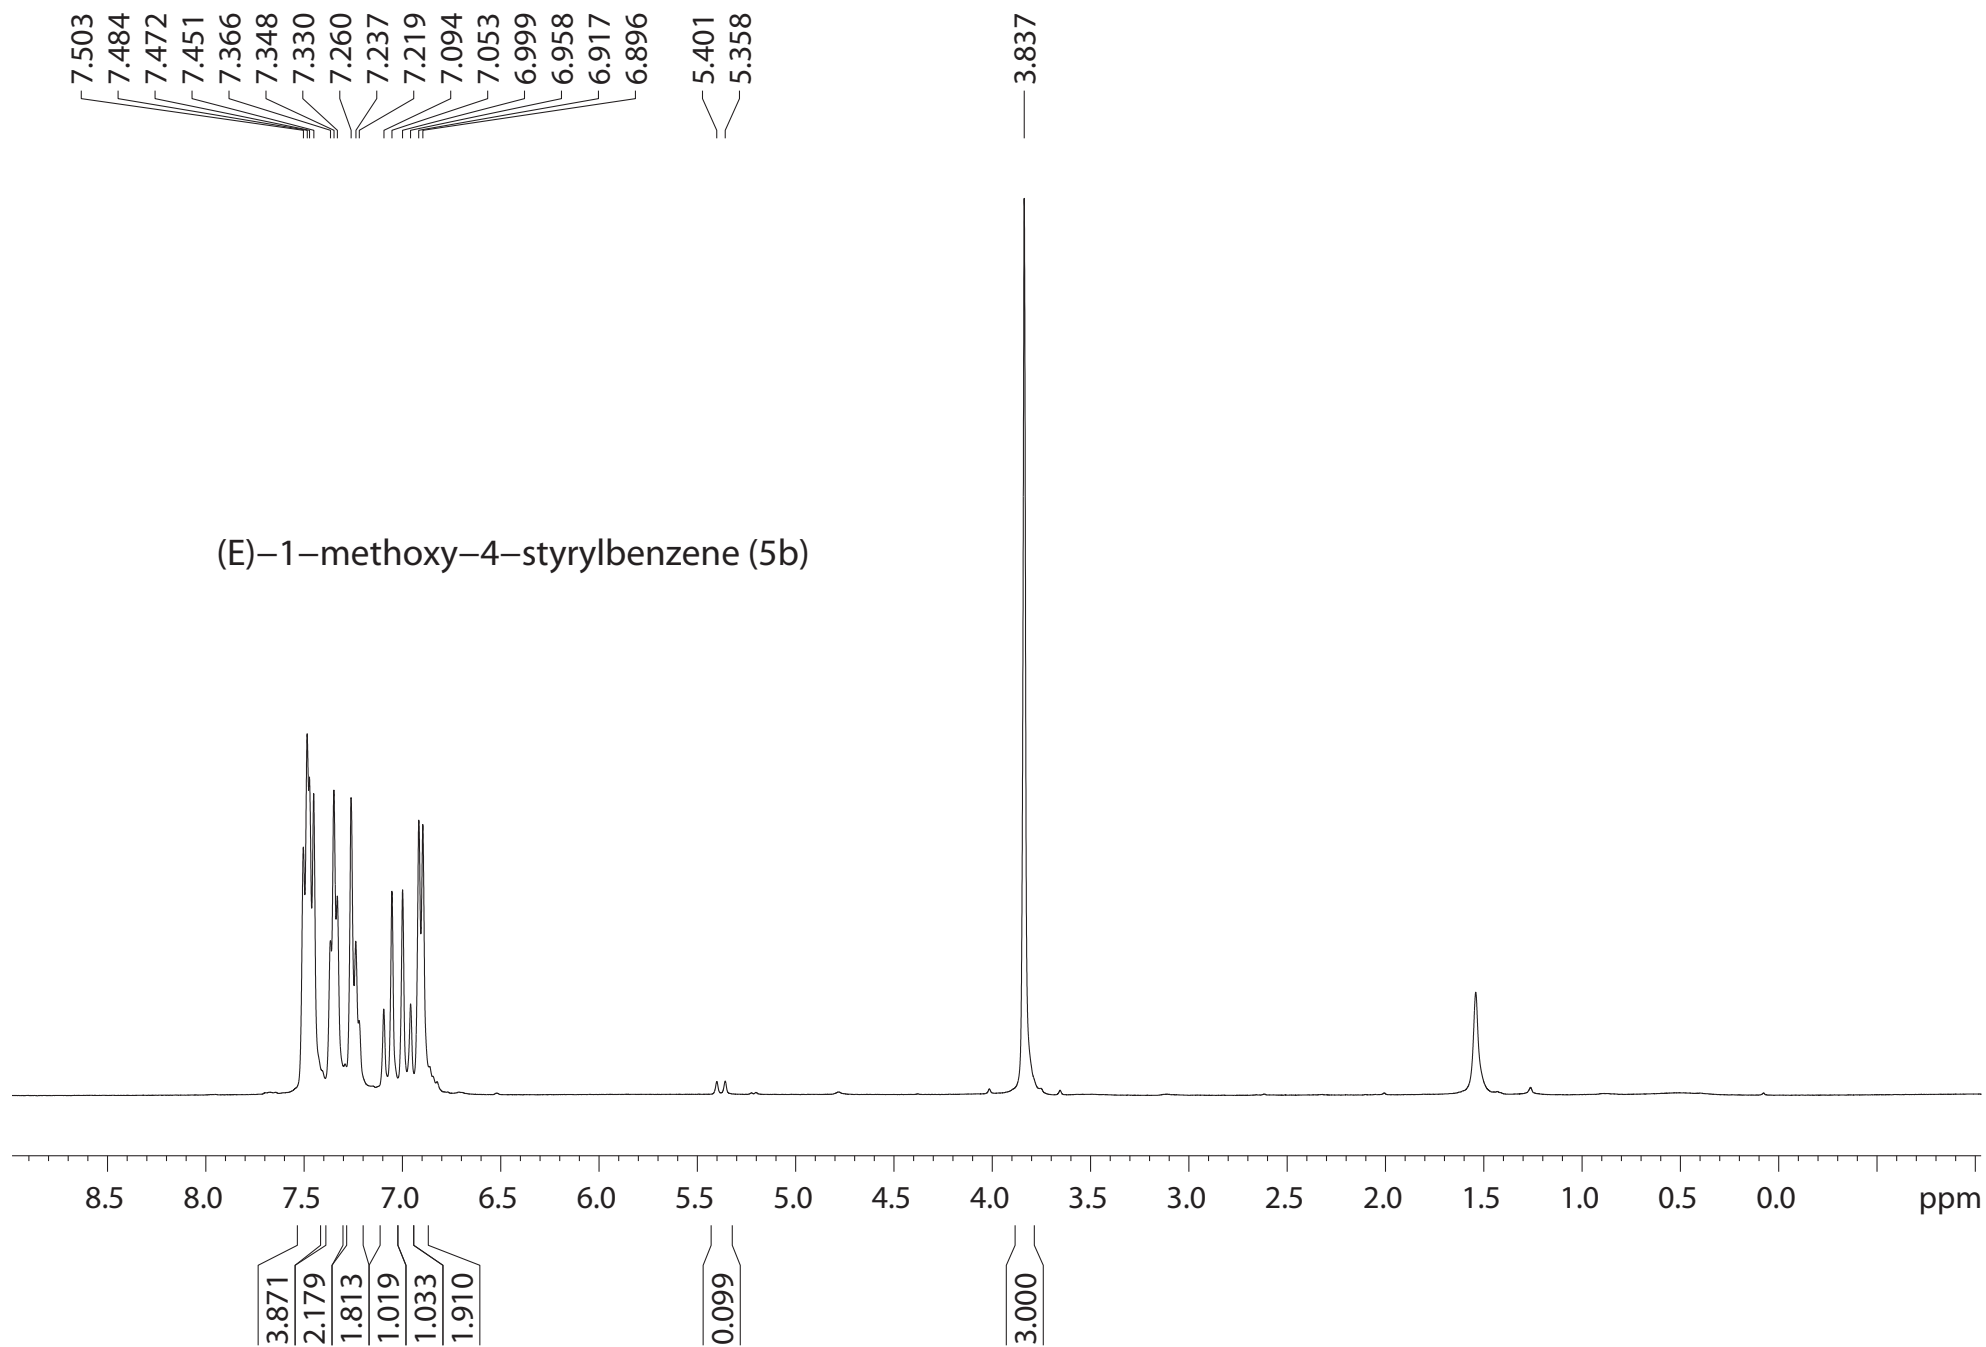

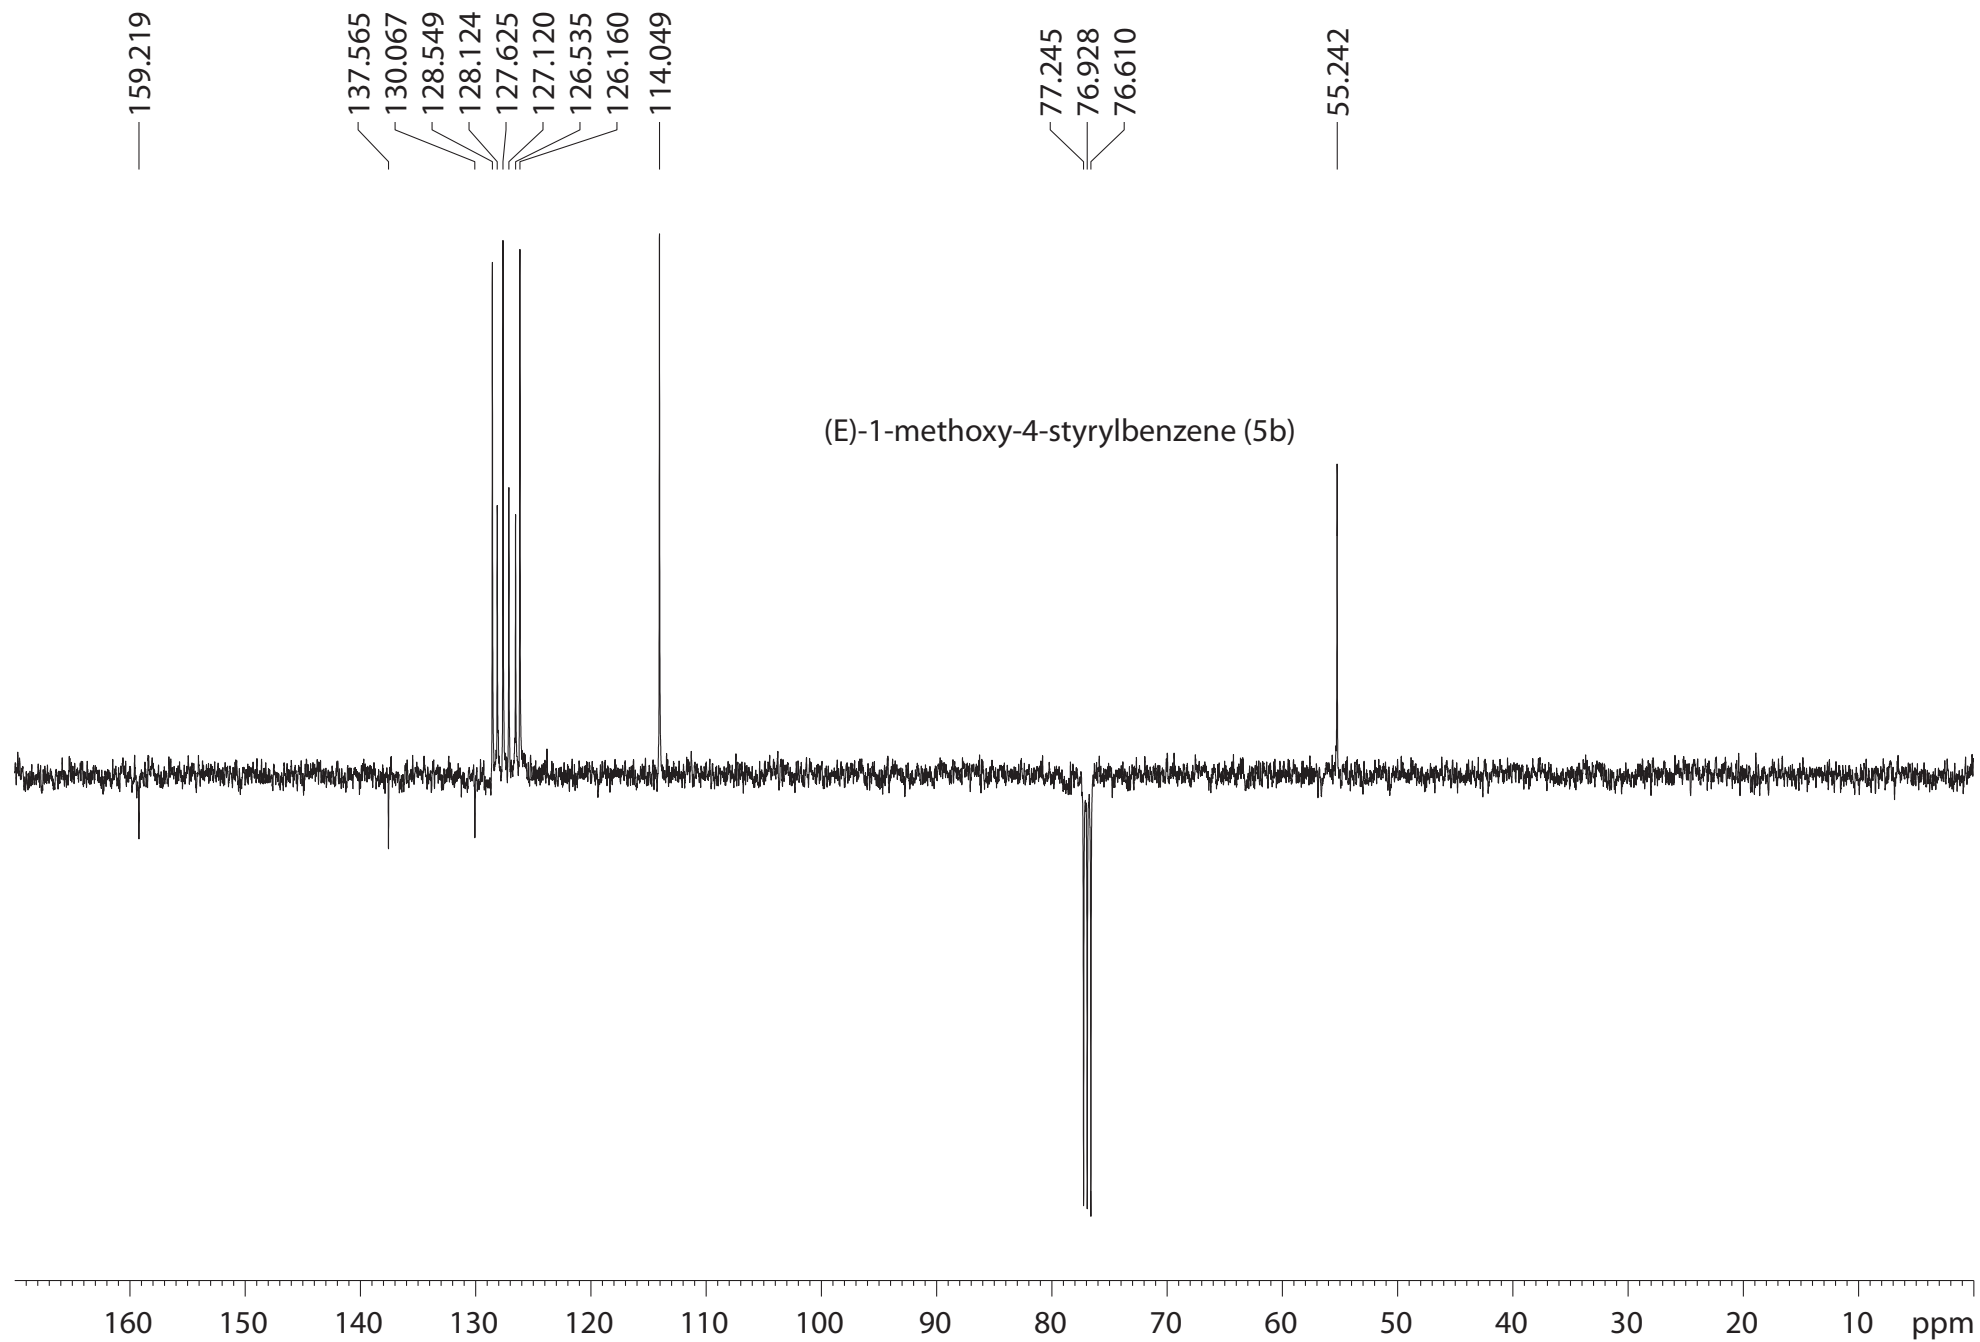

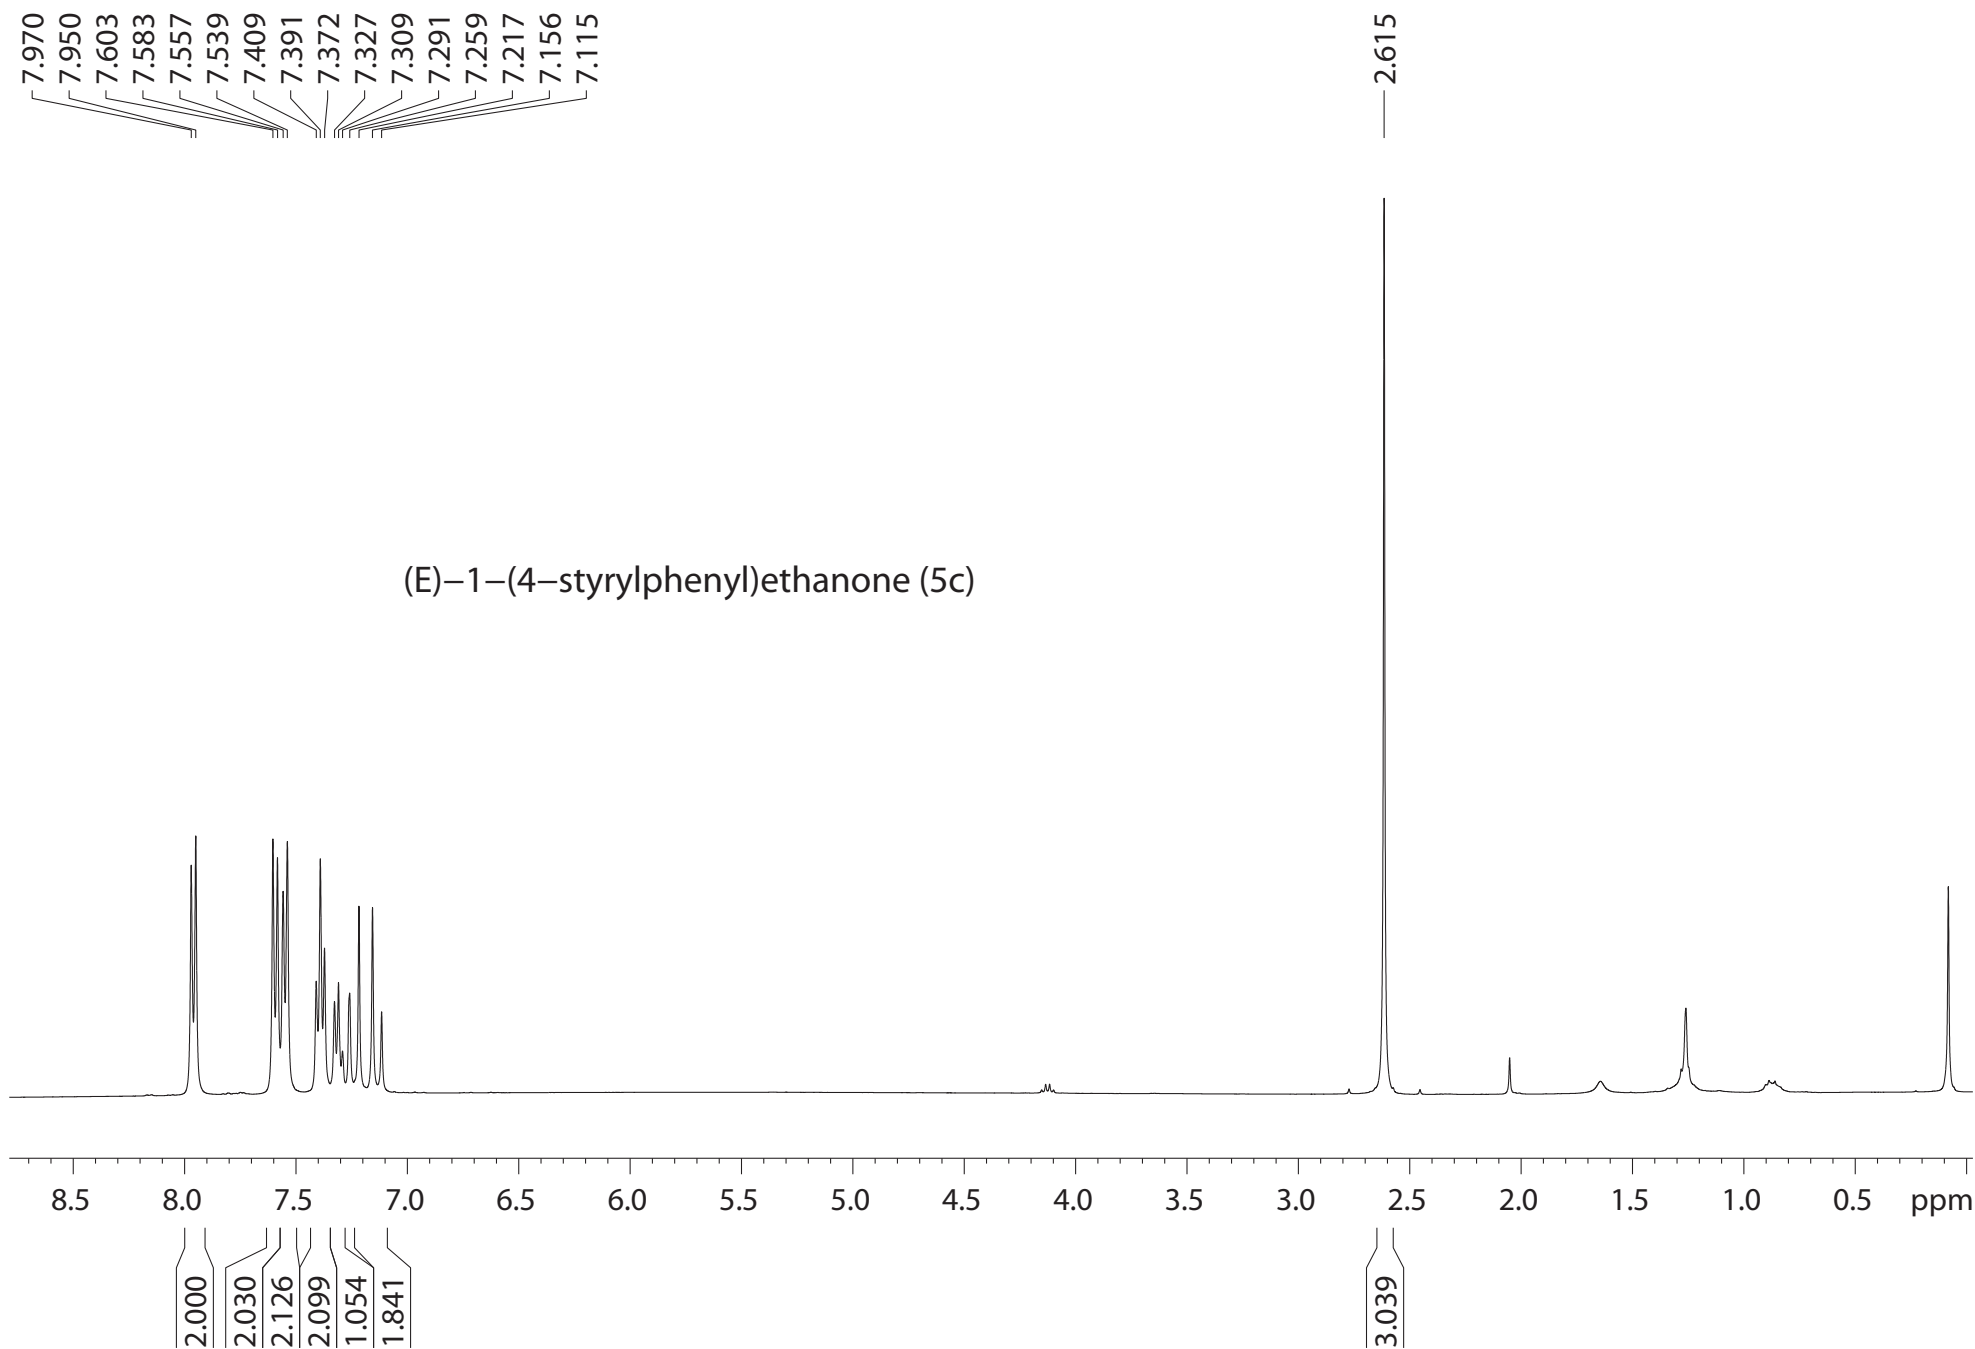

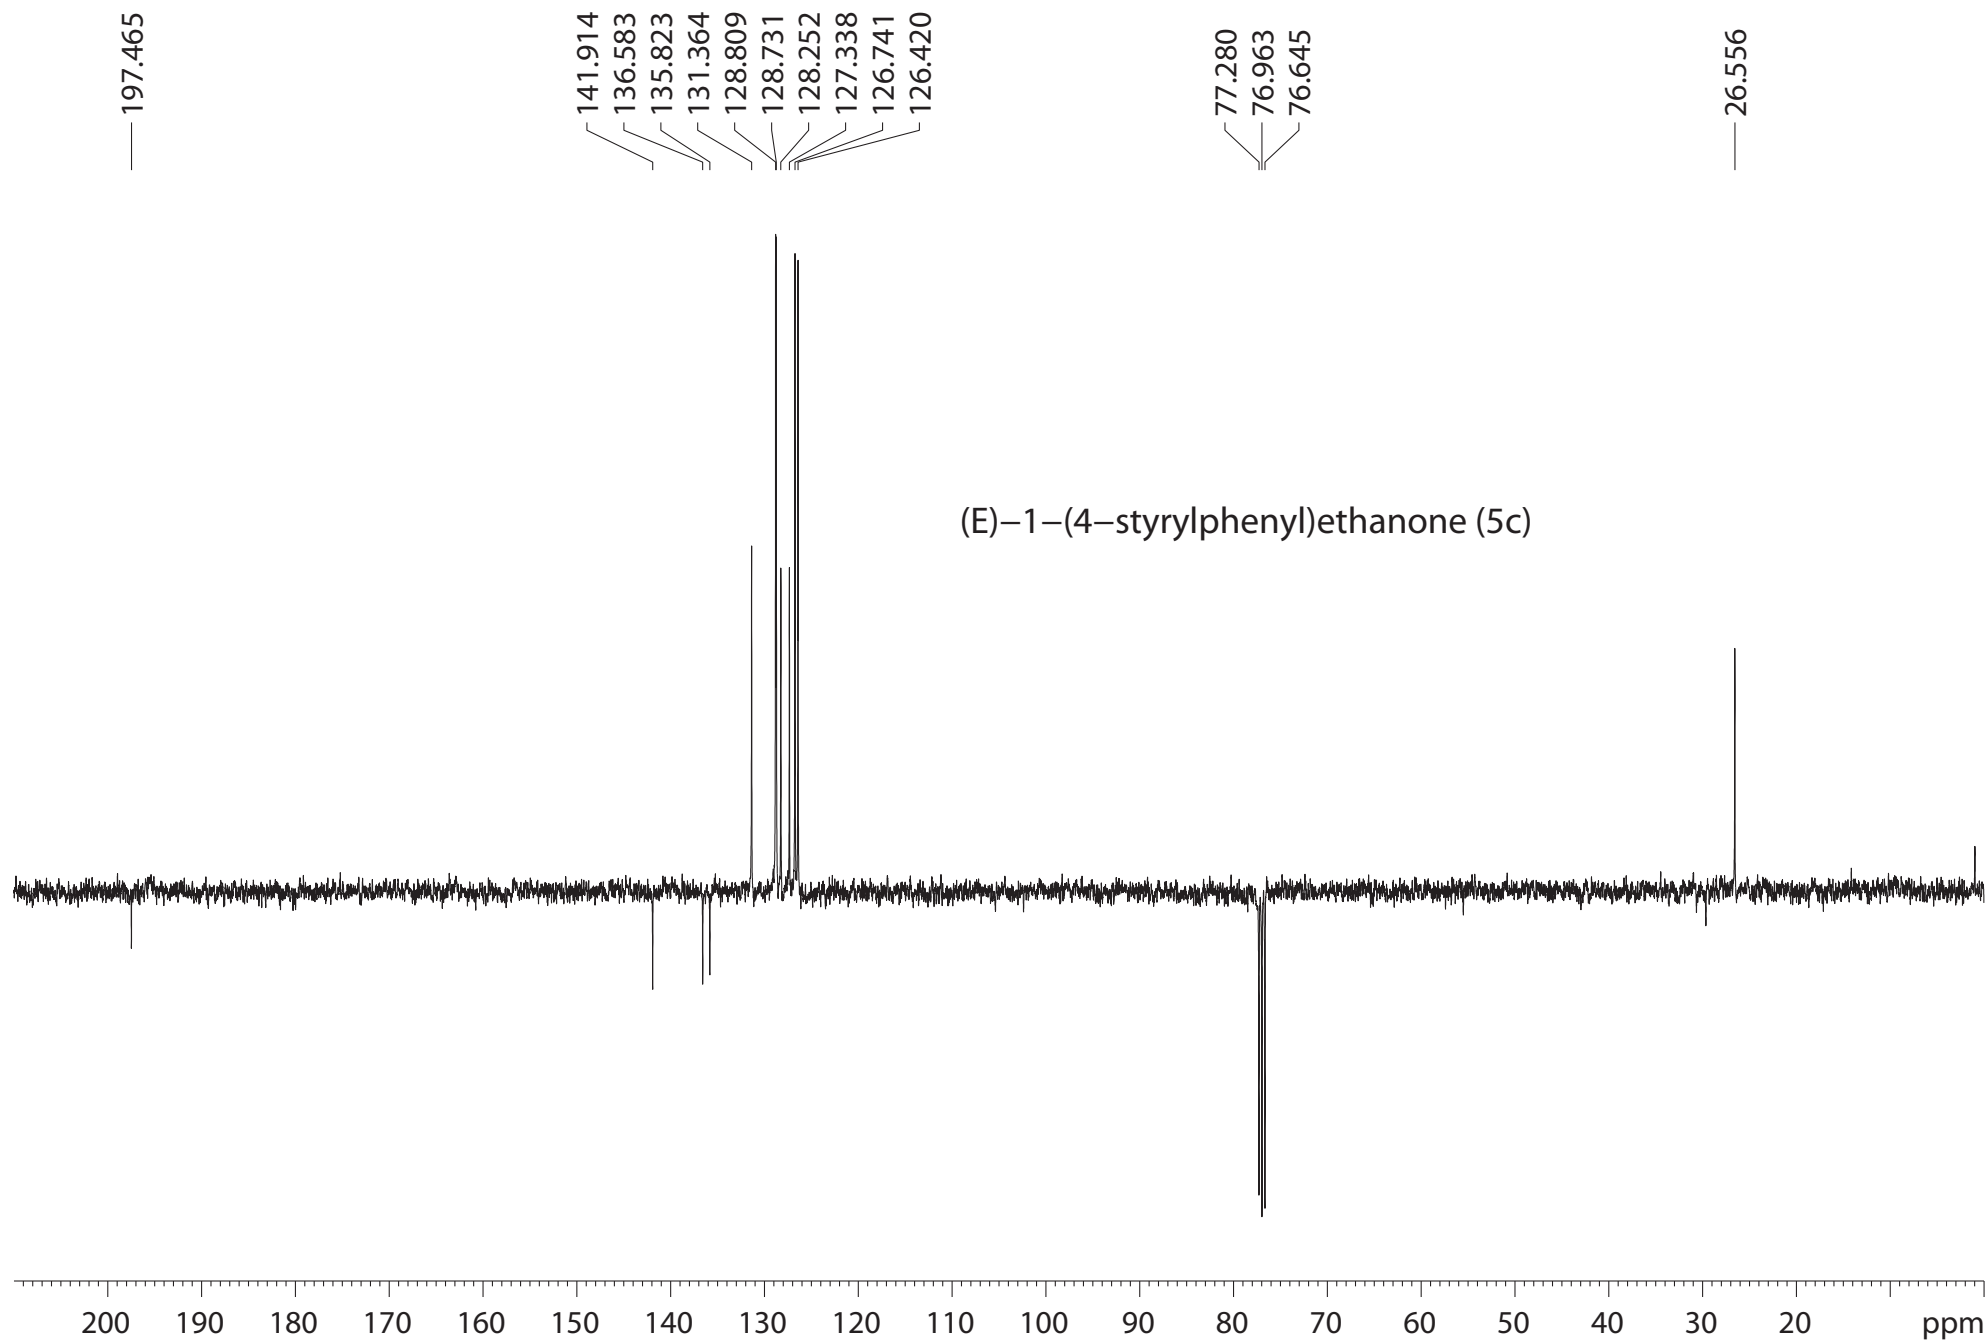



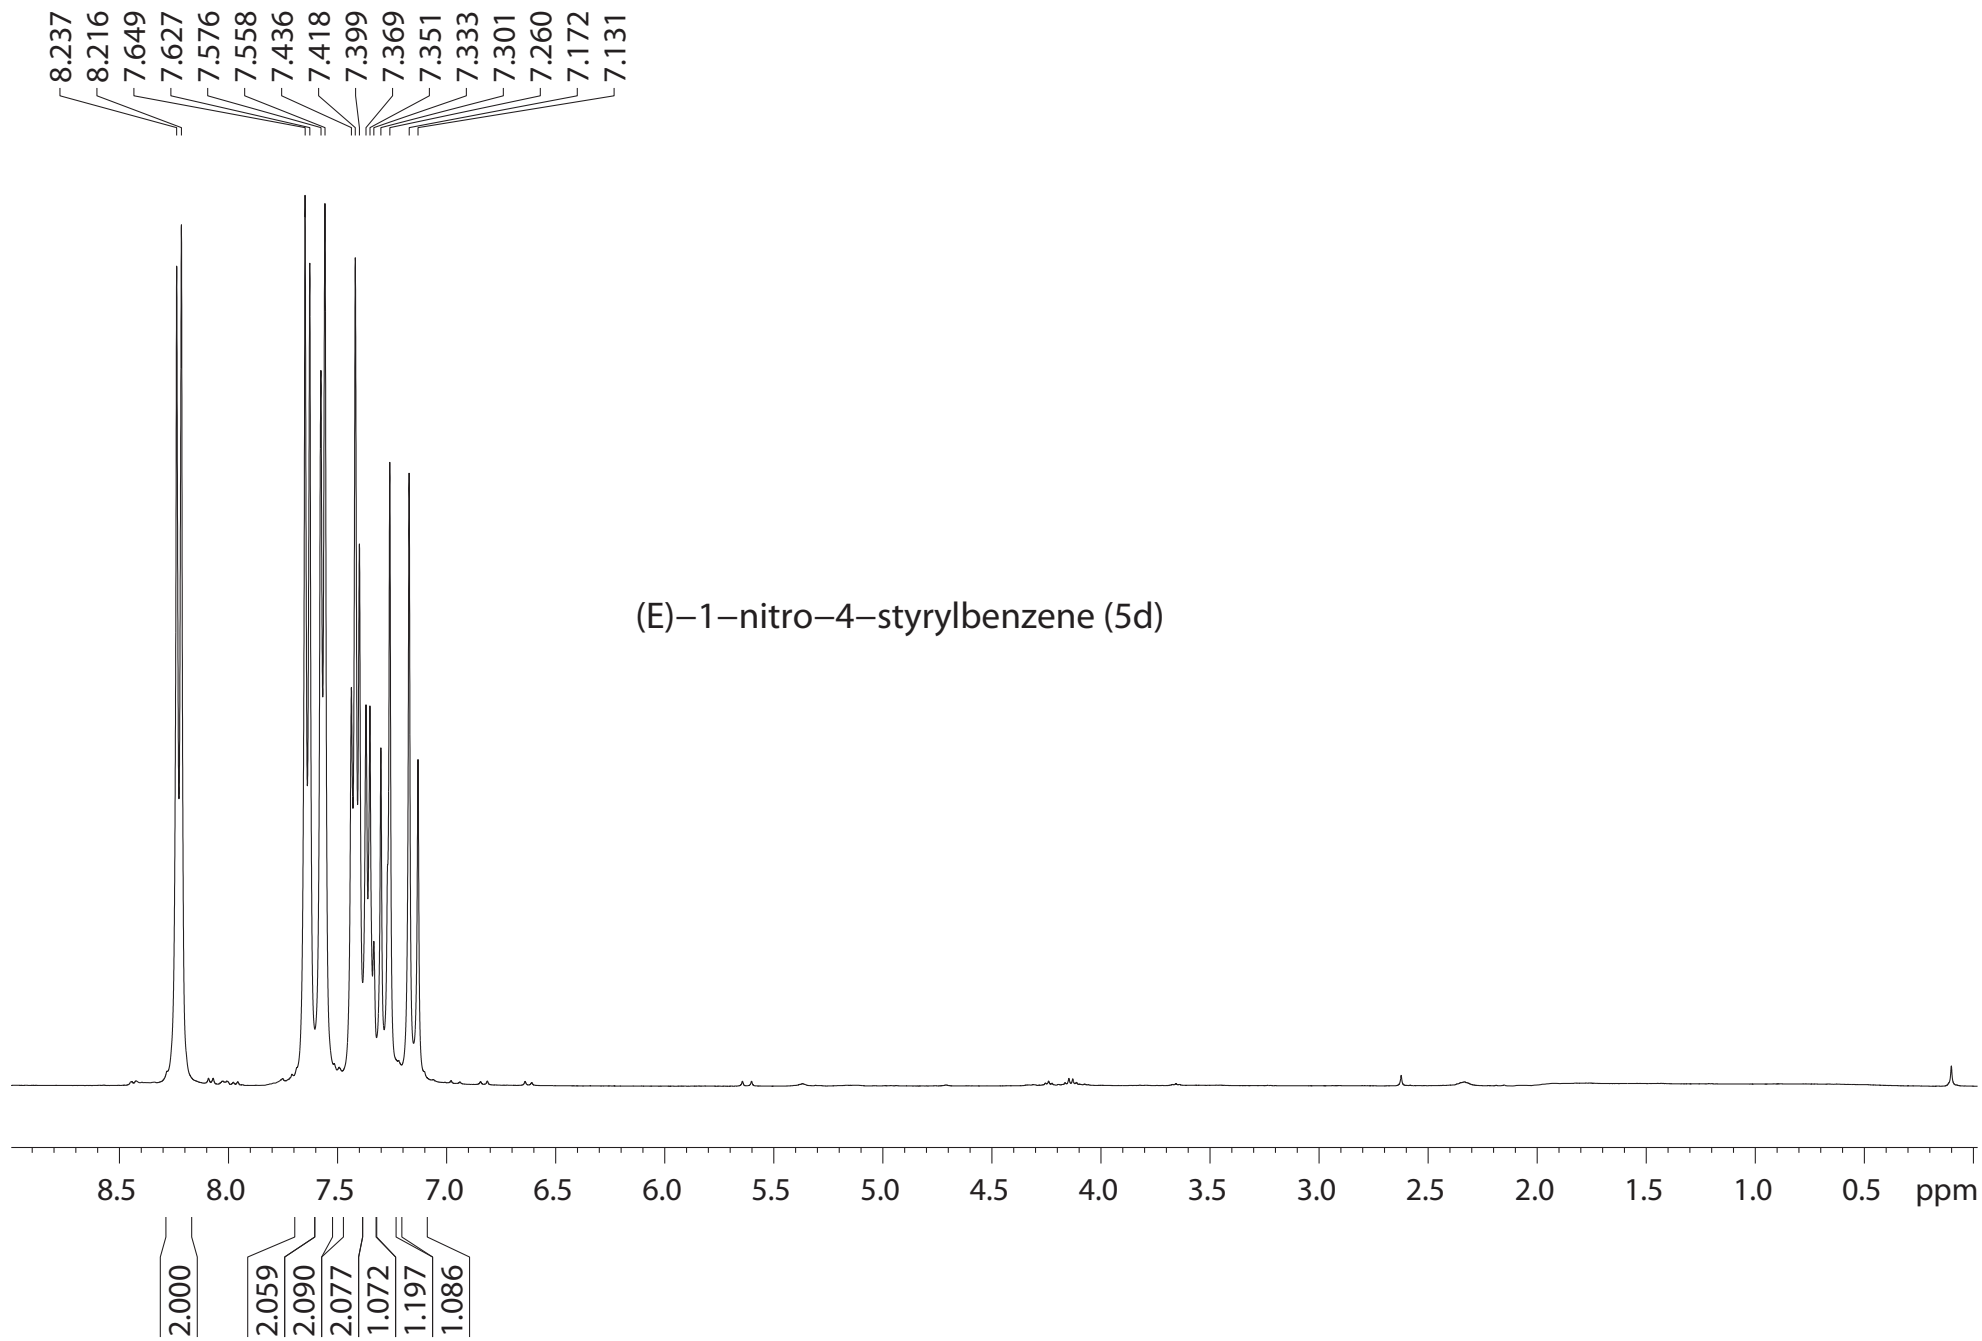

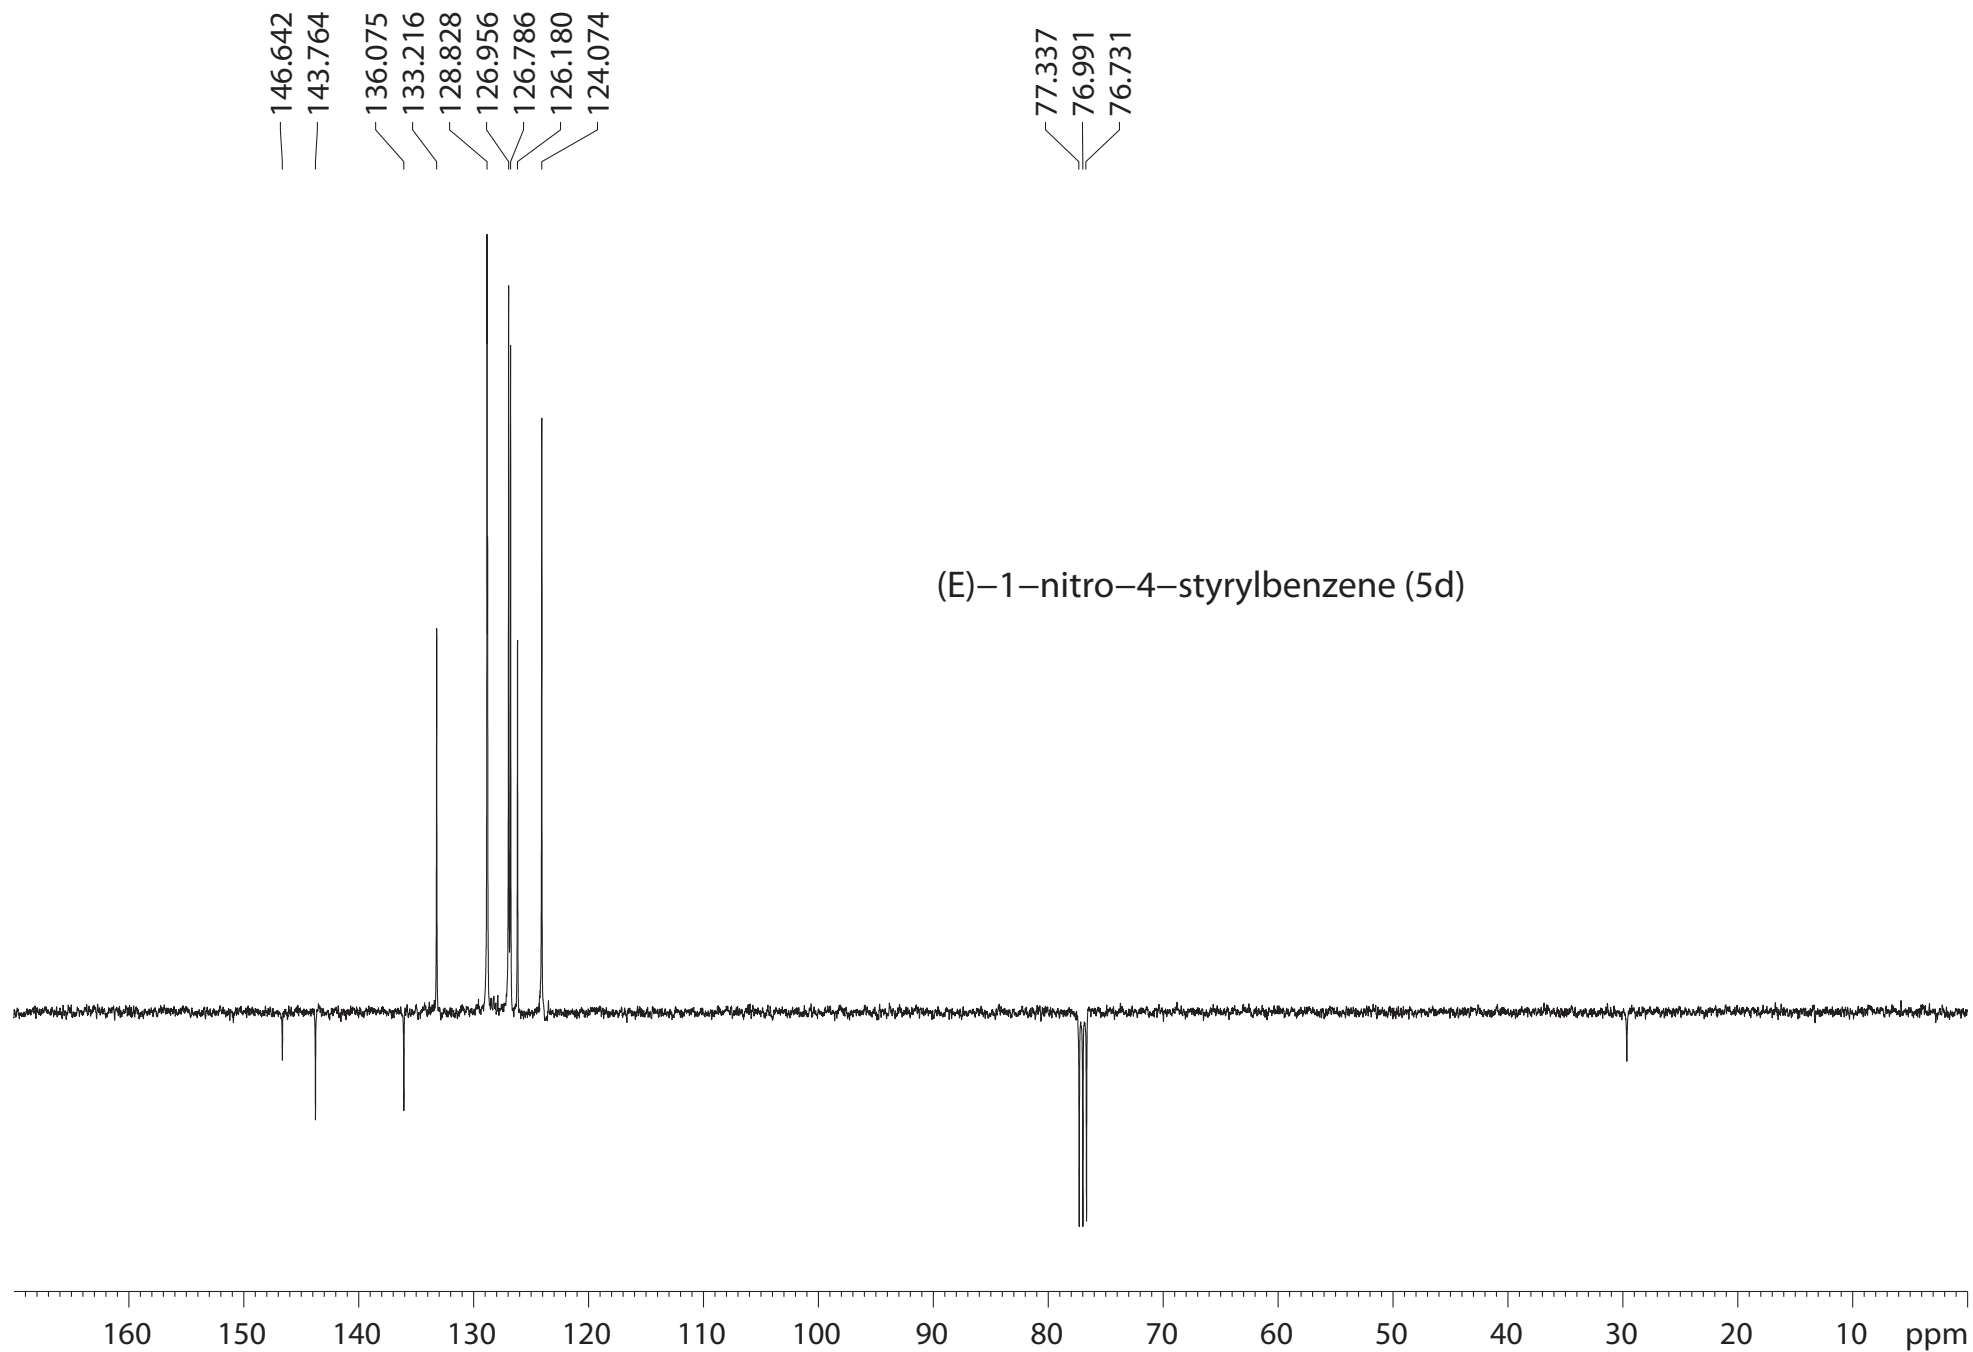

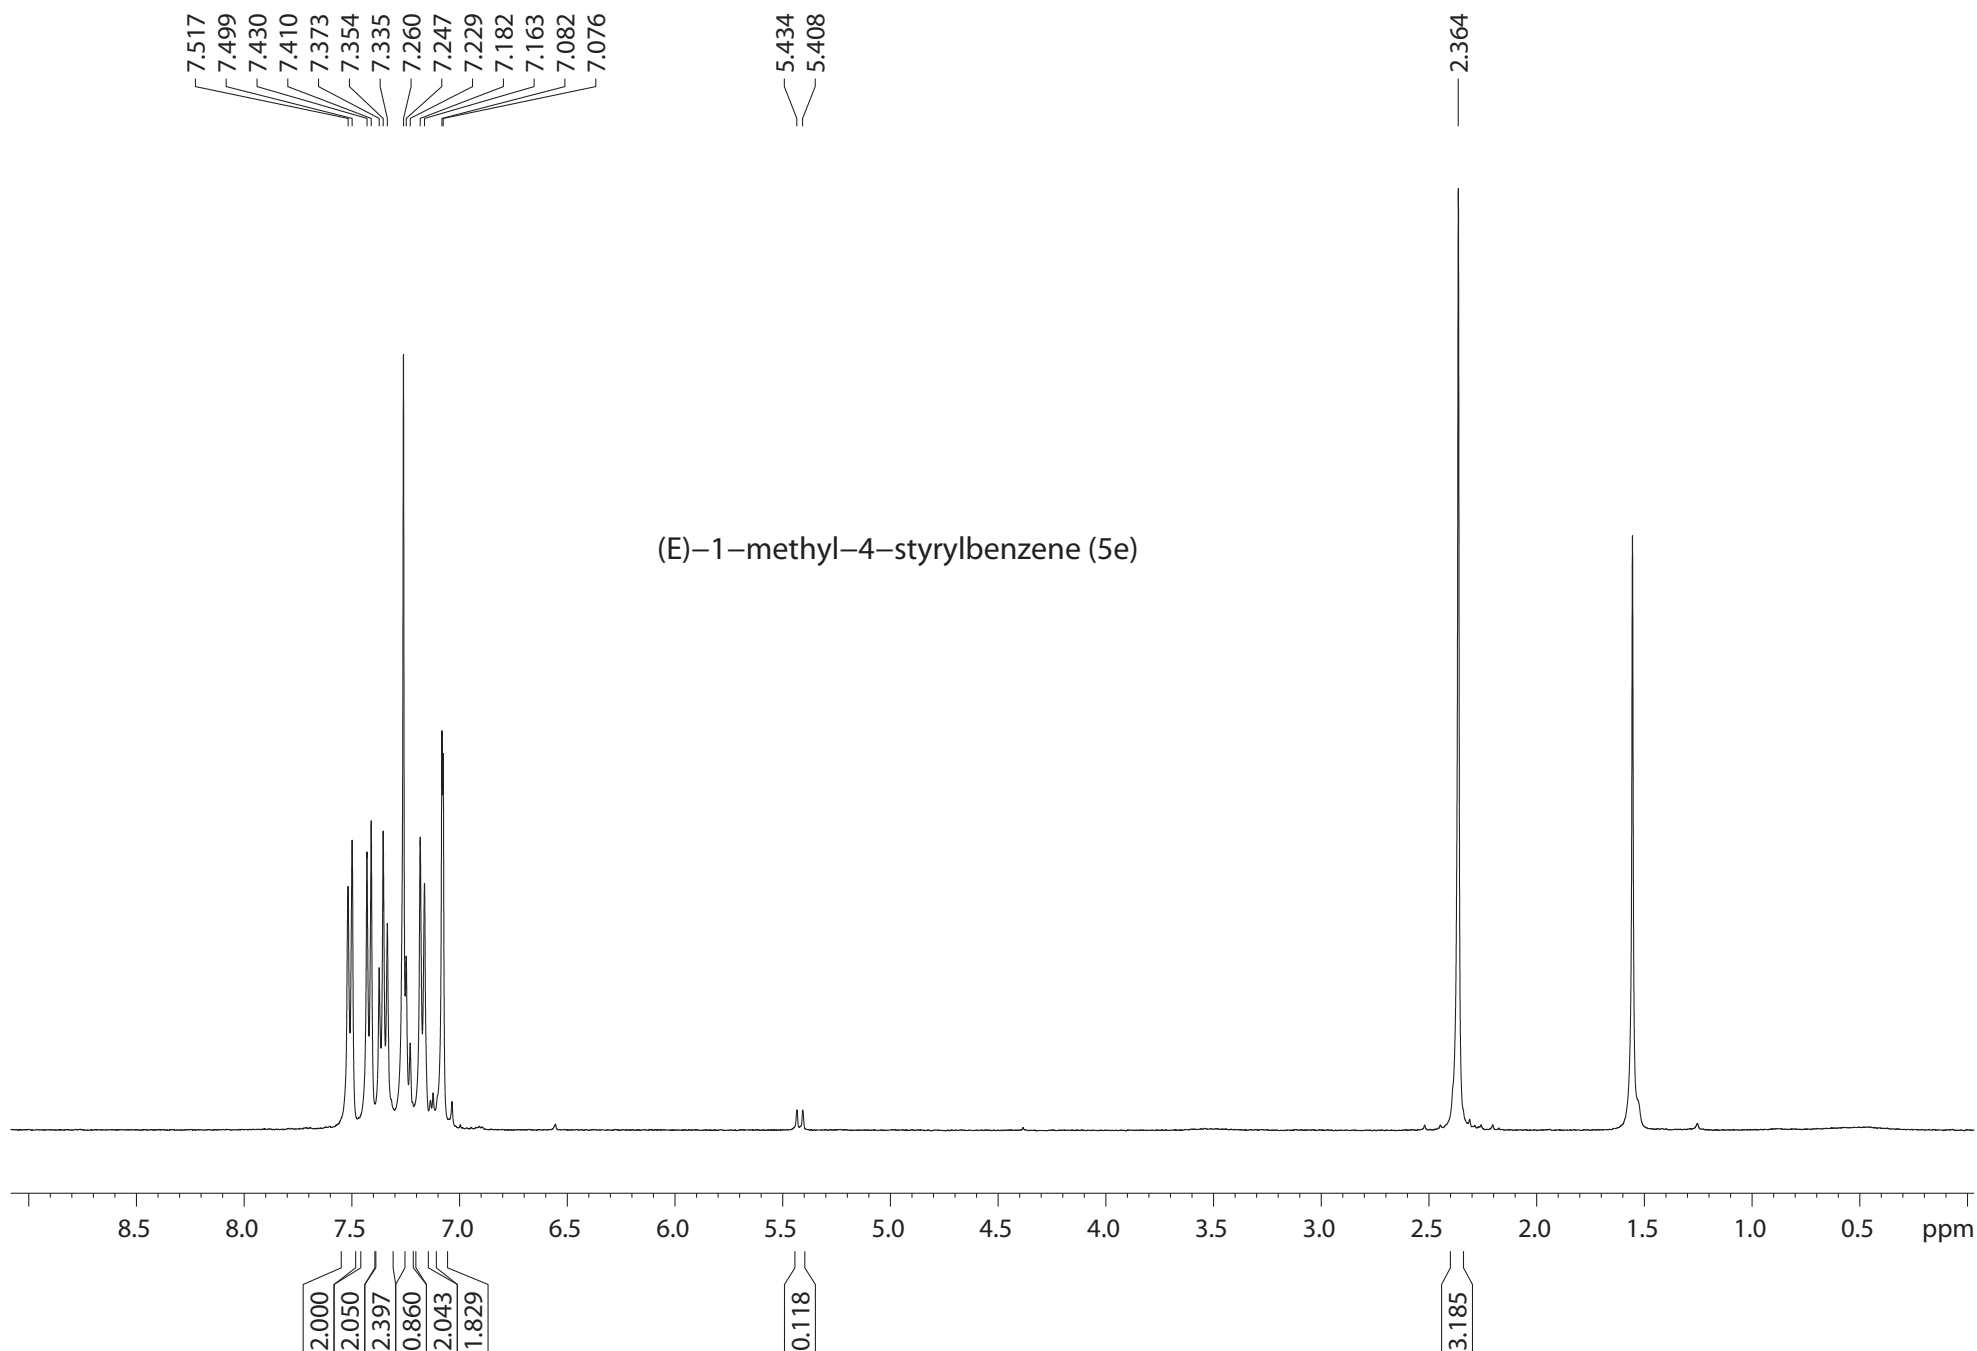

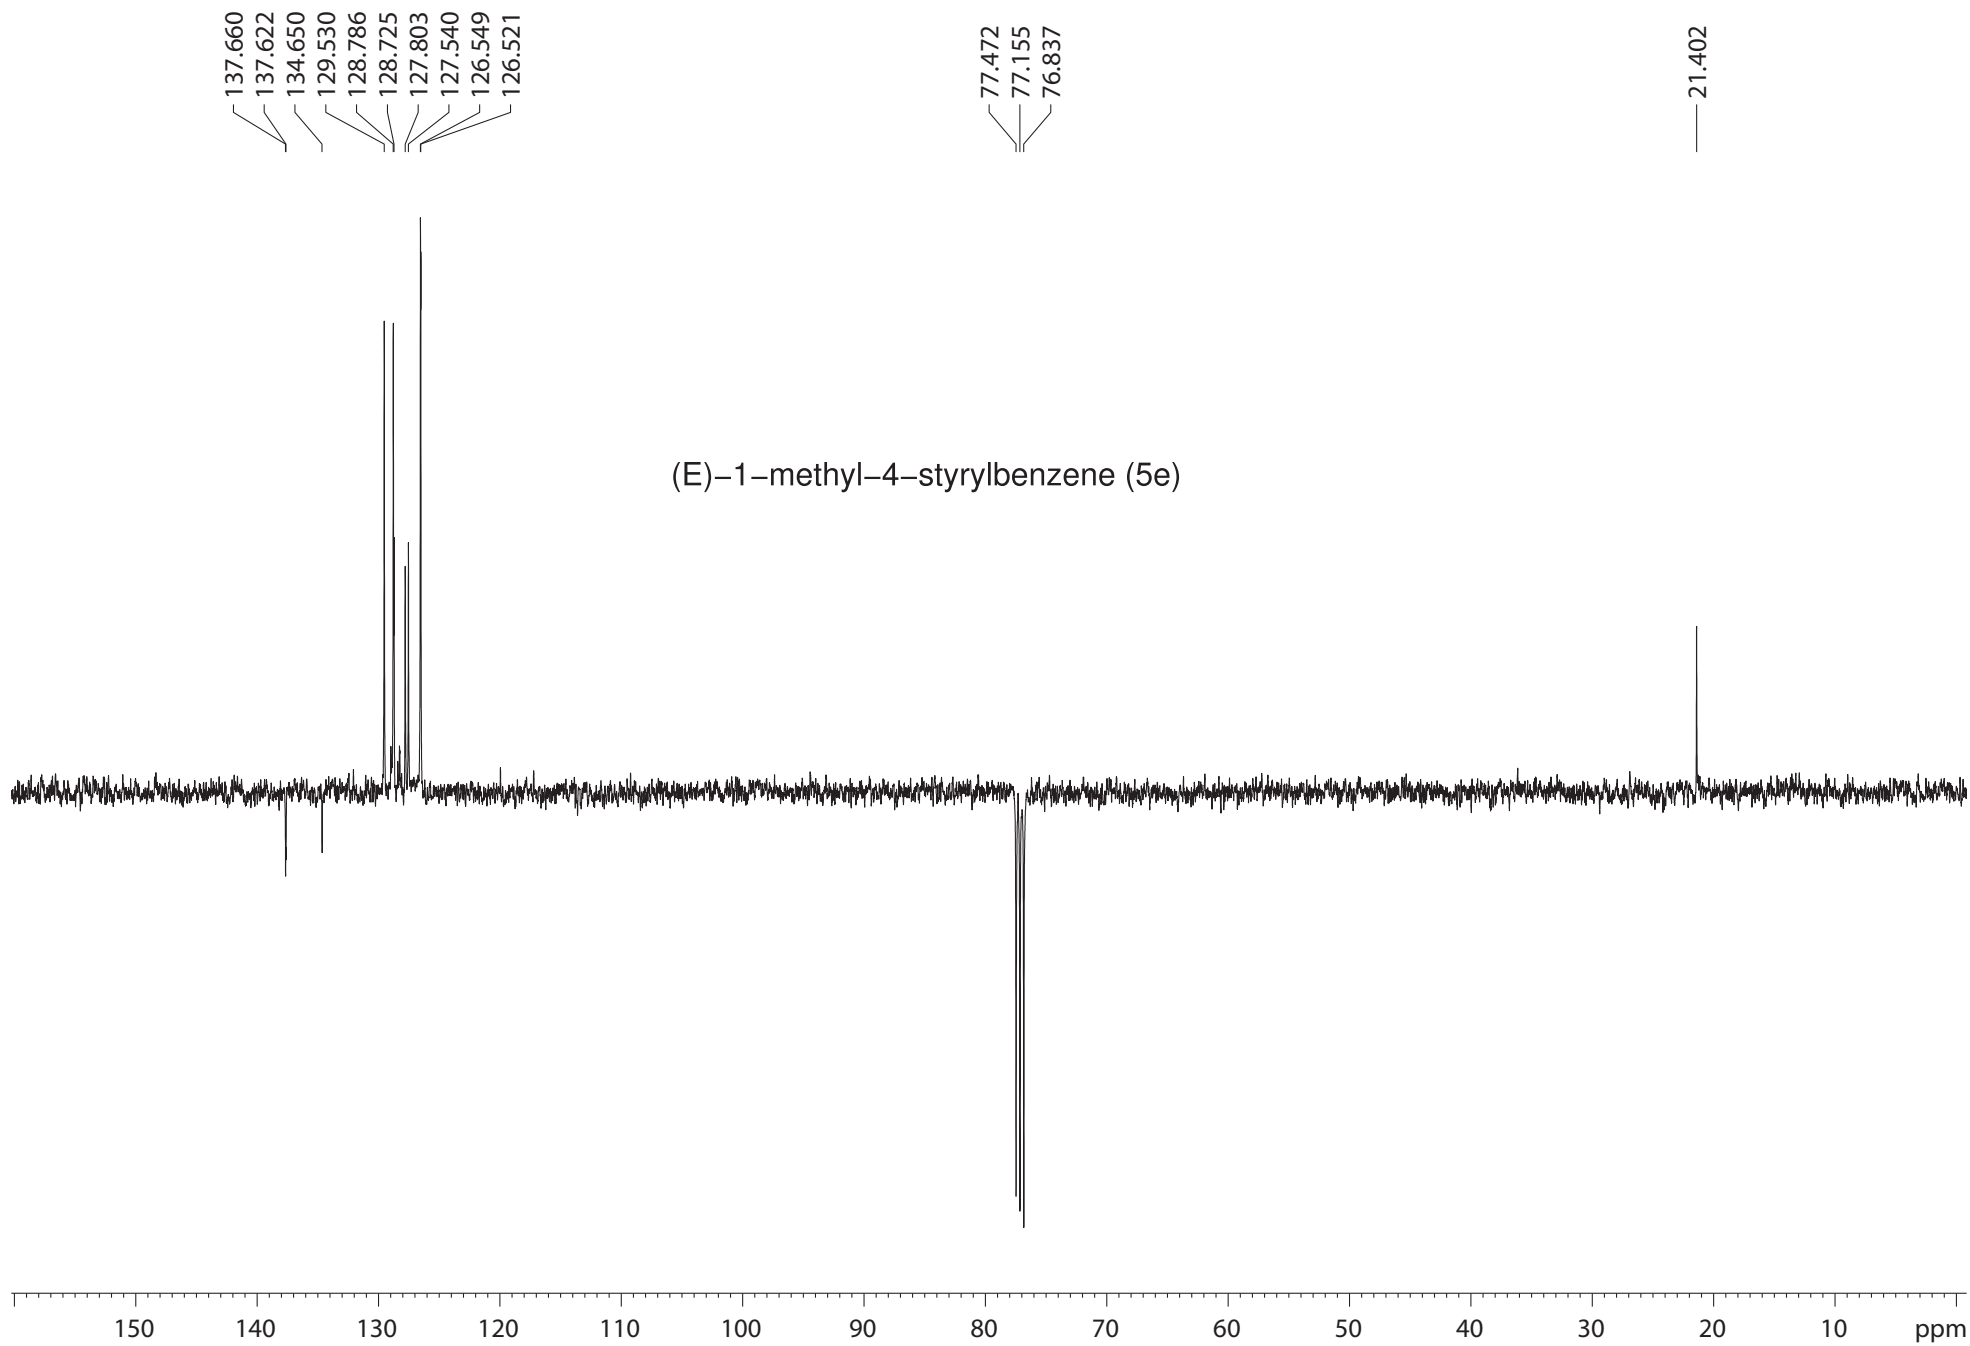

(E)-1-chloro-4-styrylbenzene (5f)

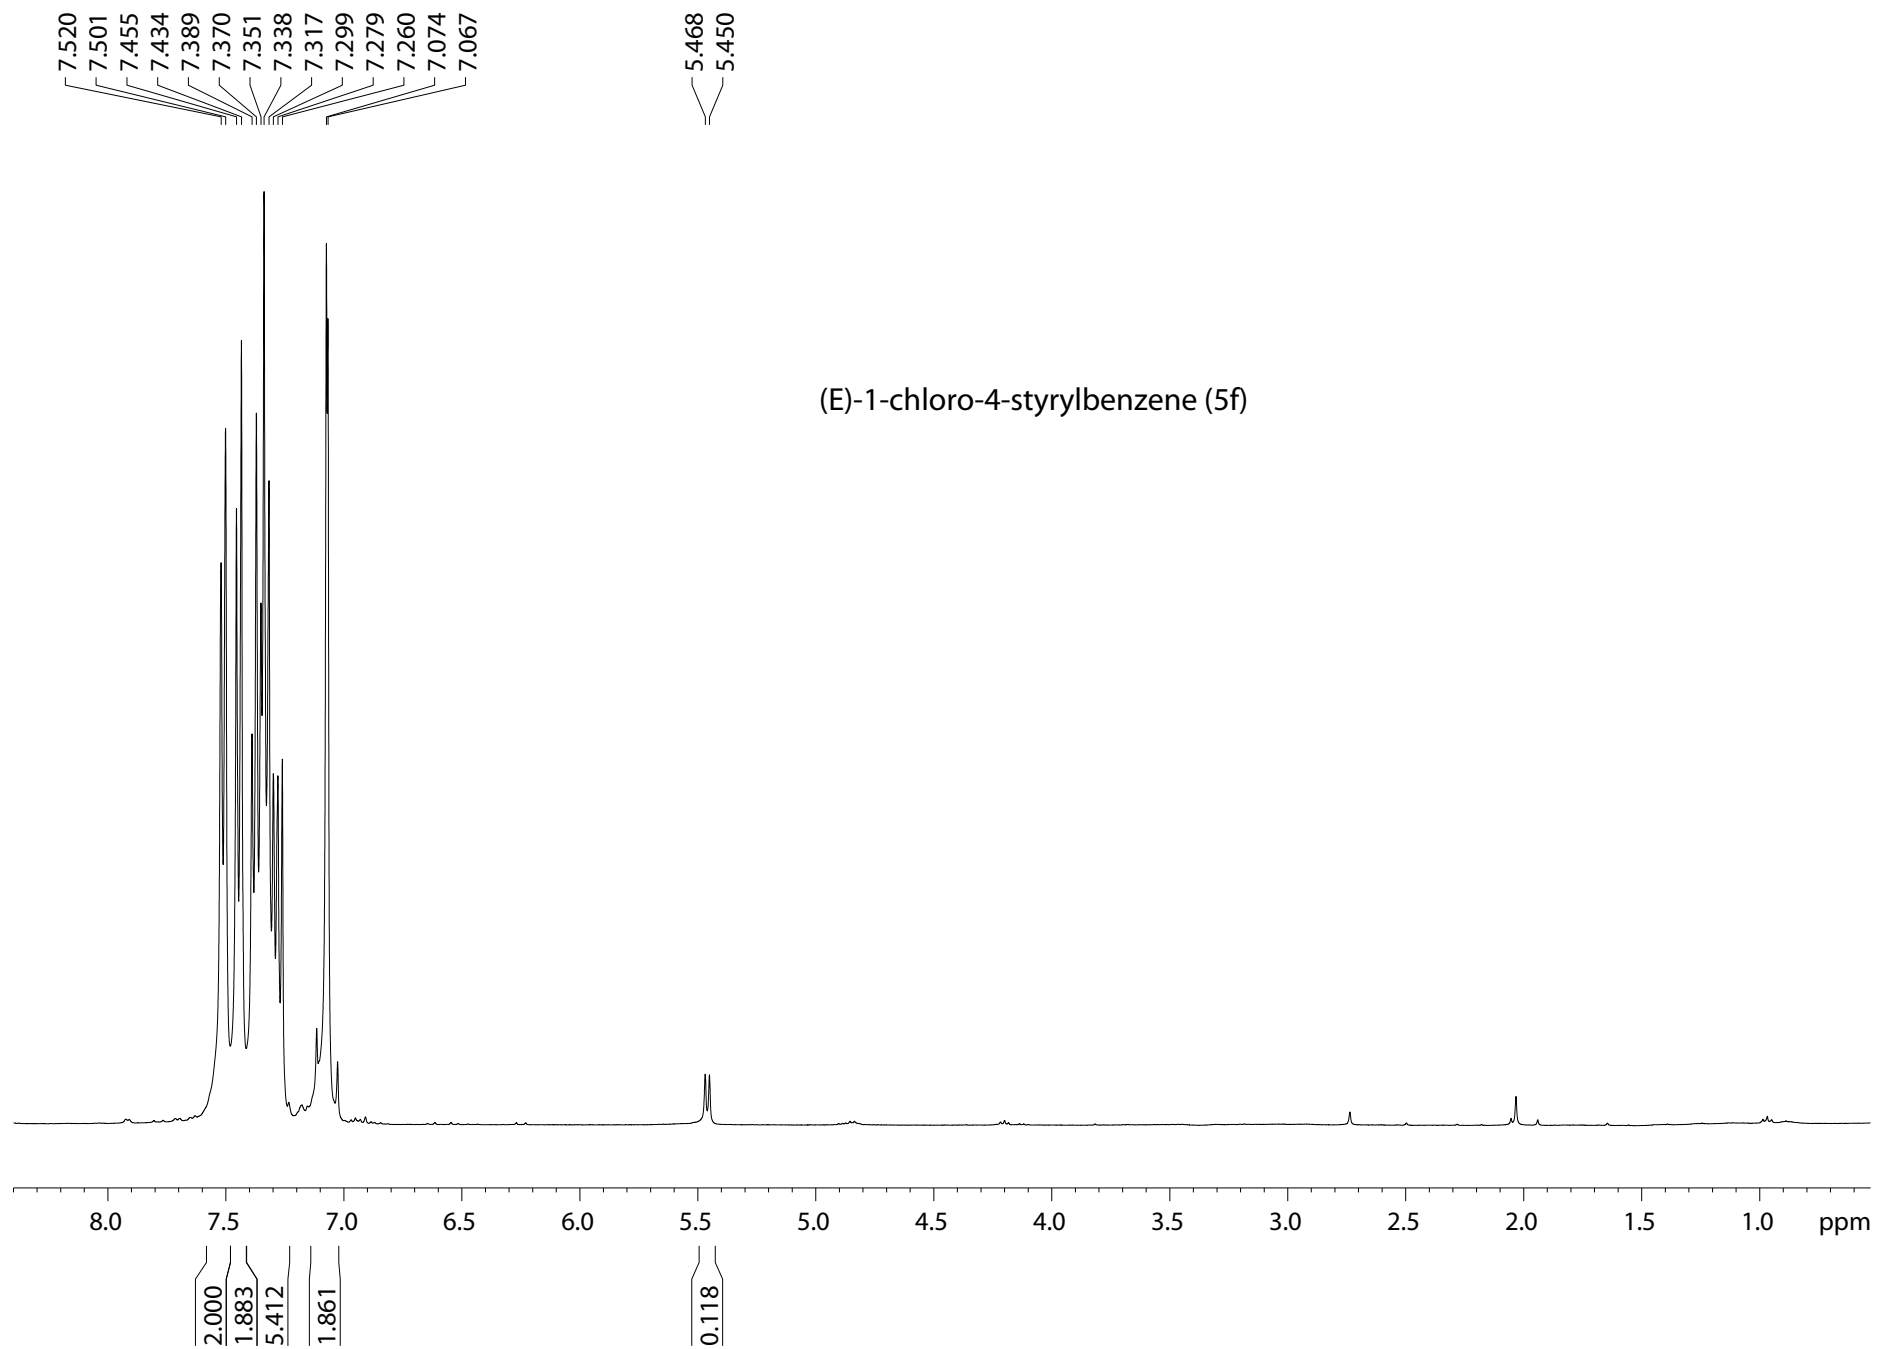

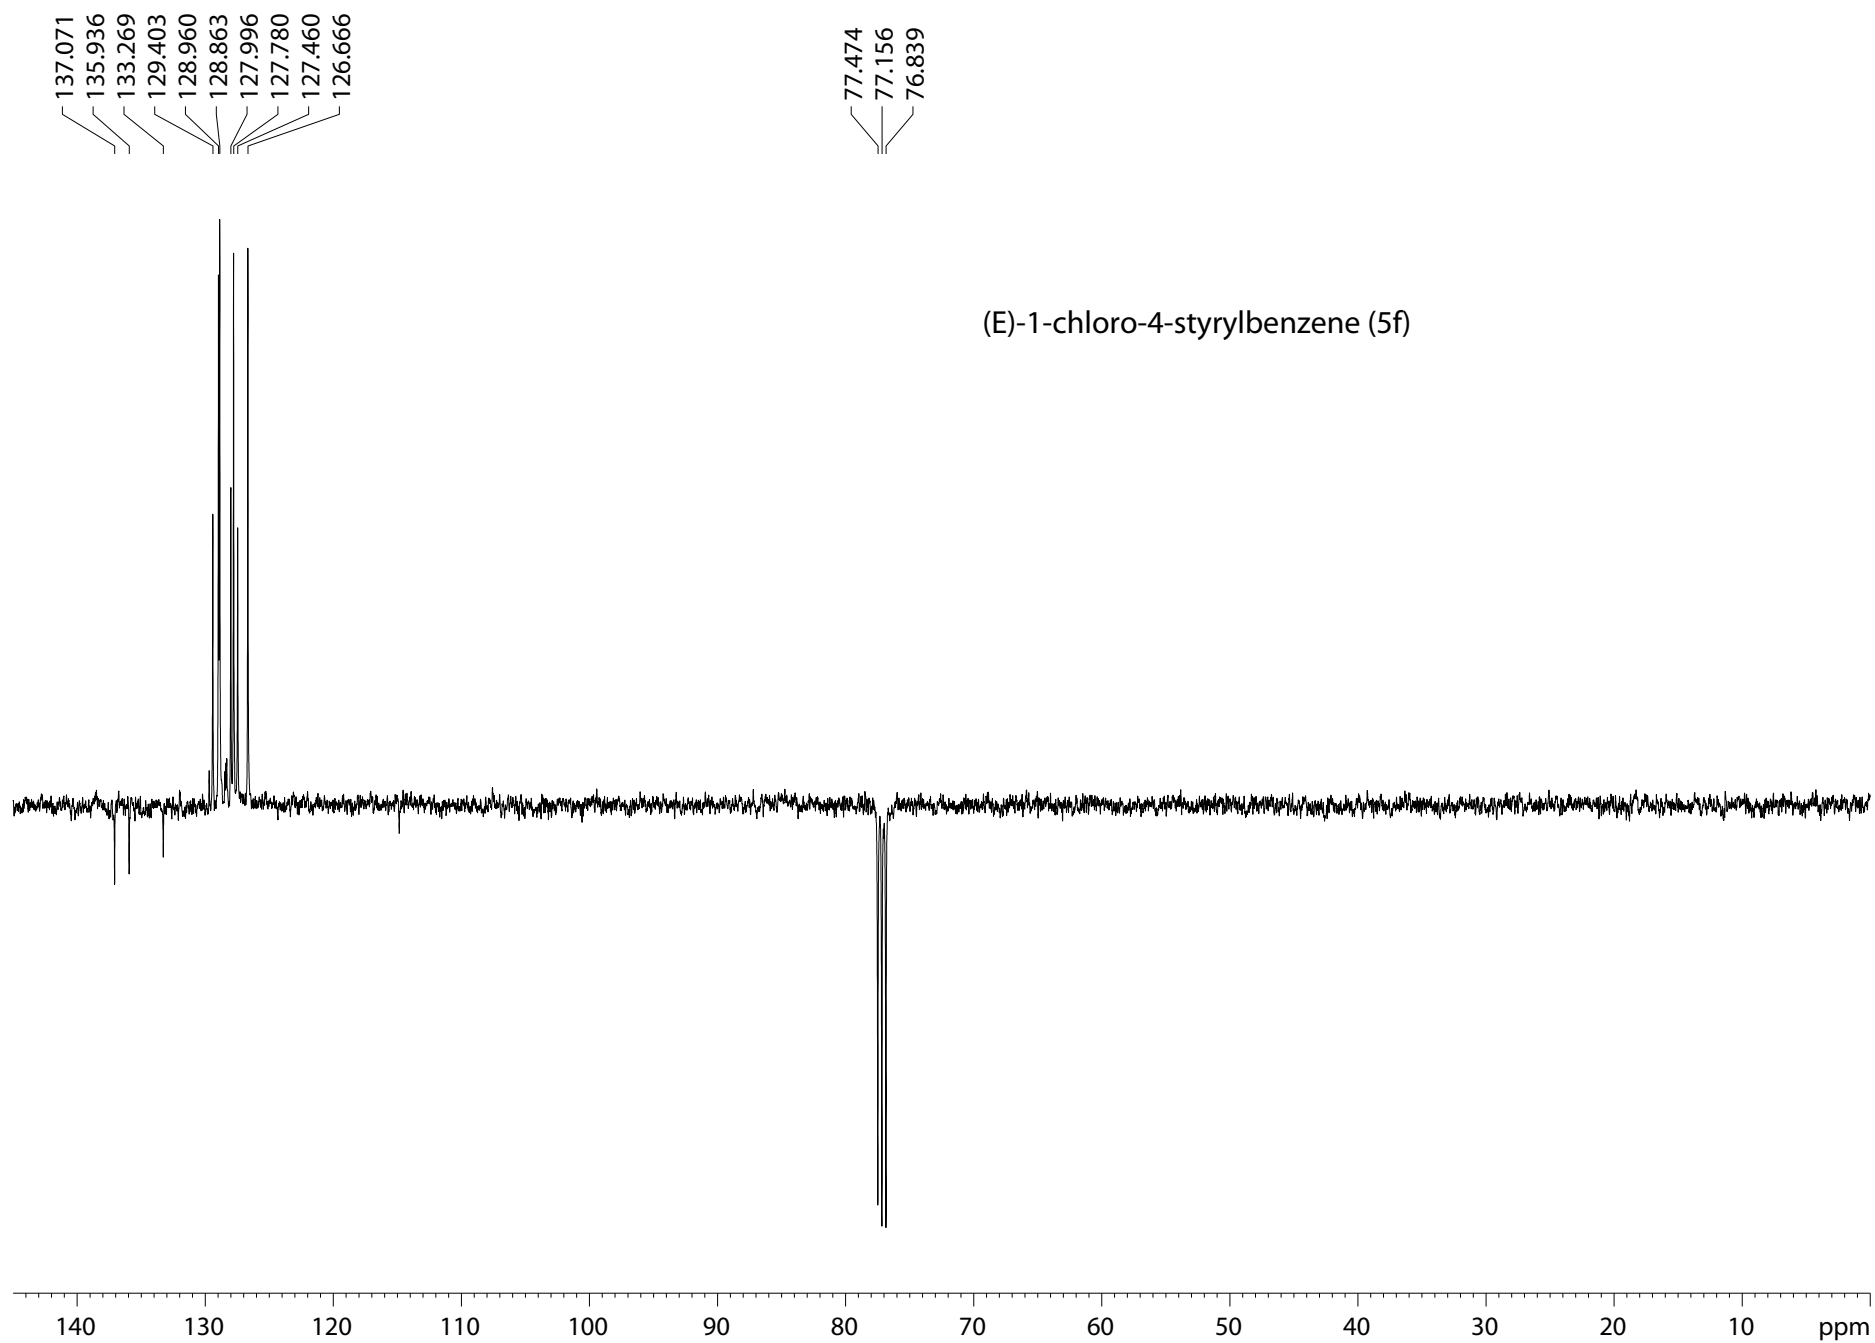

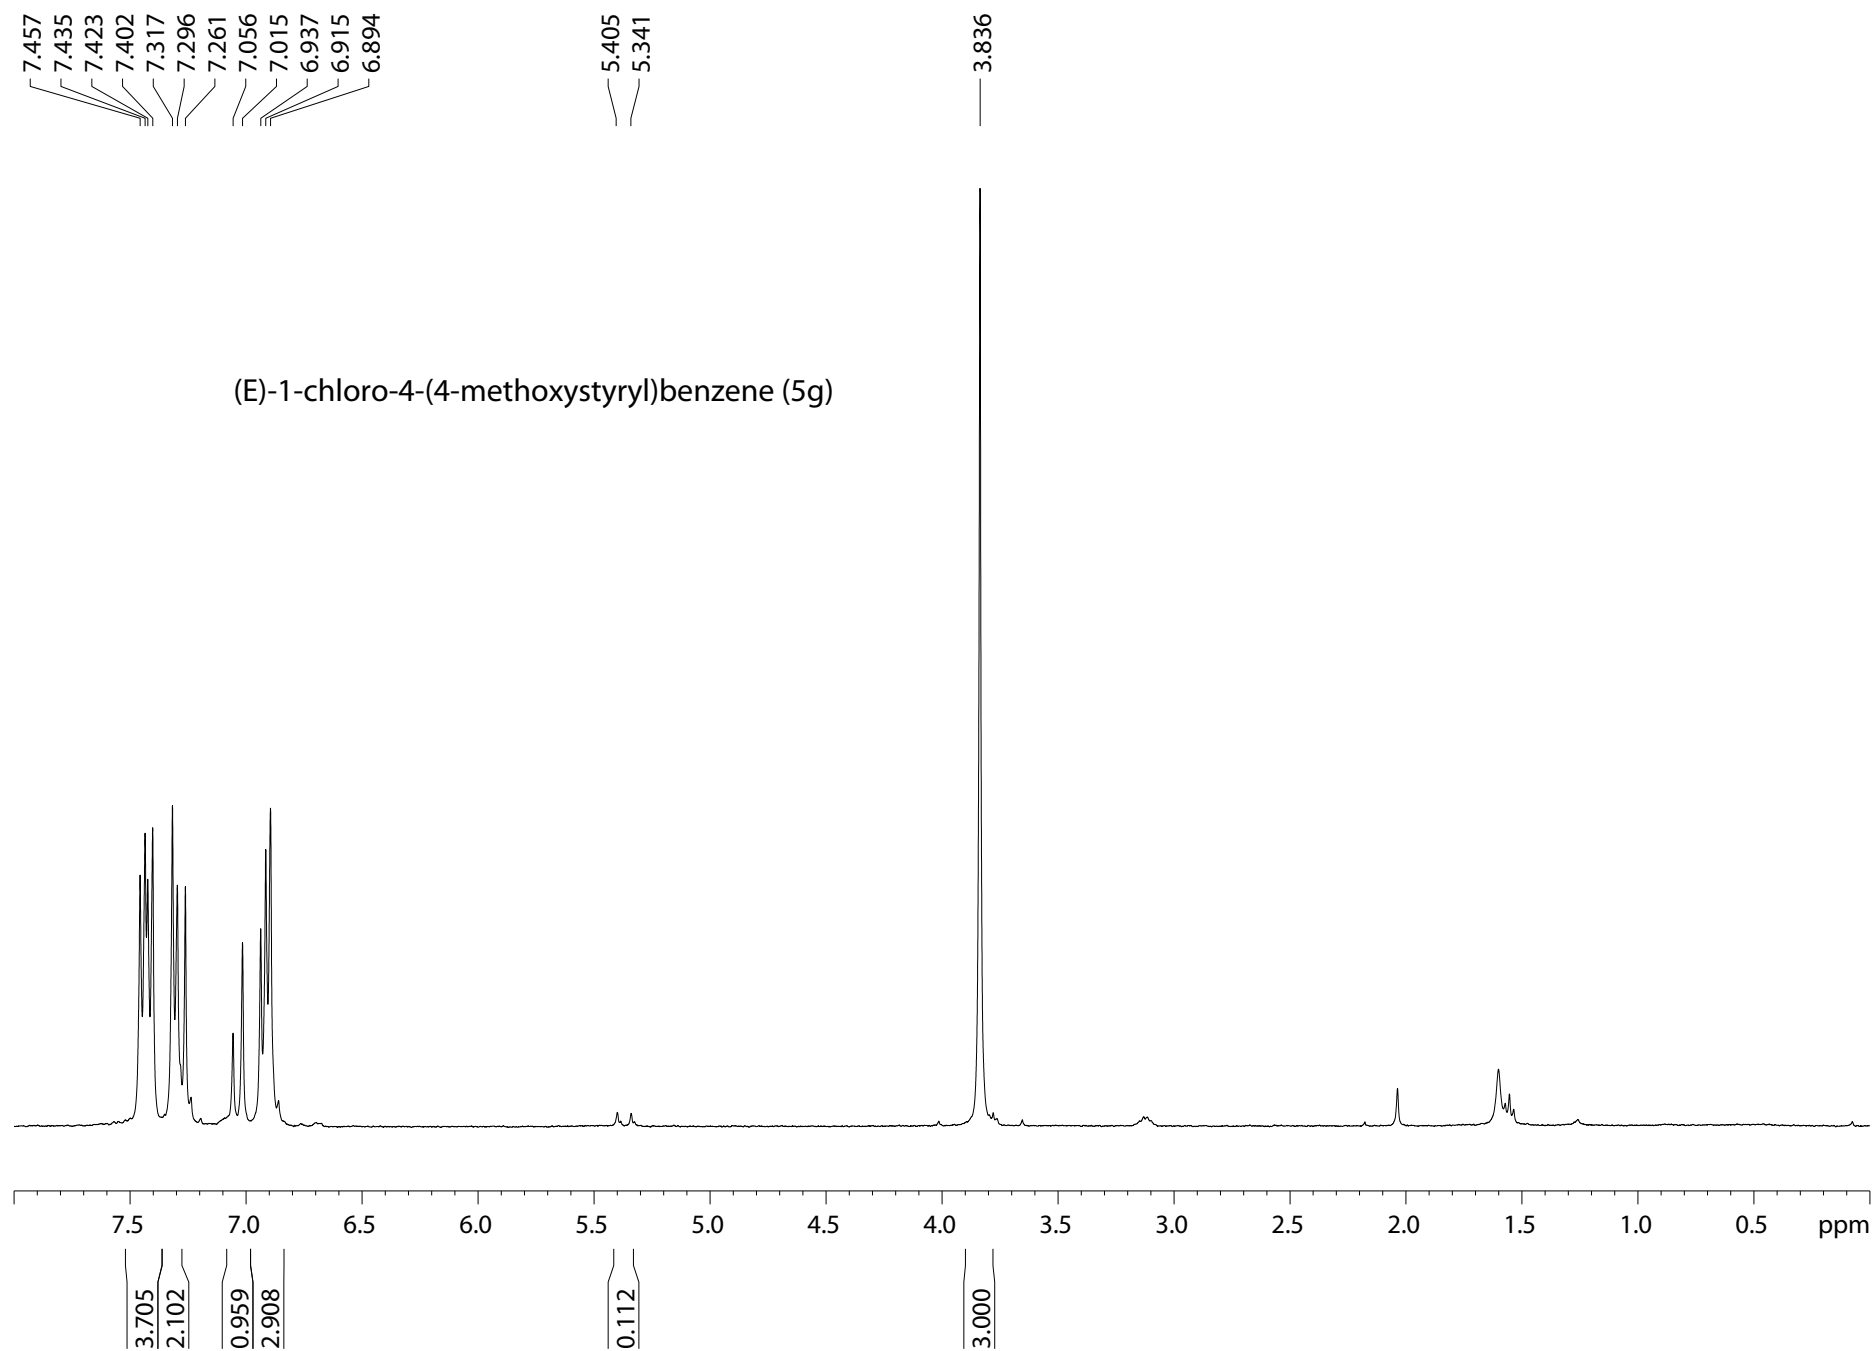

(E)-1-chloro-4-(4-methoxystyryl)benzene (5g)

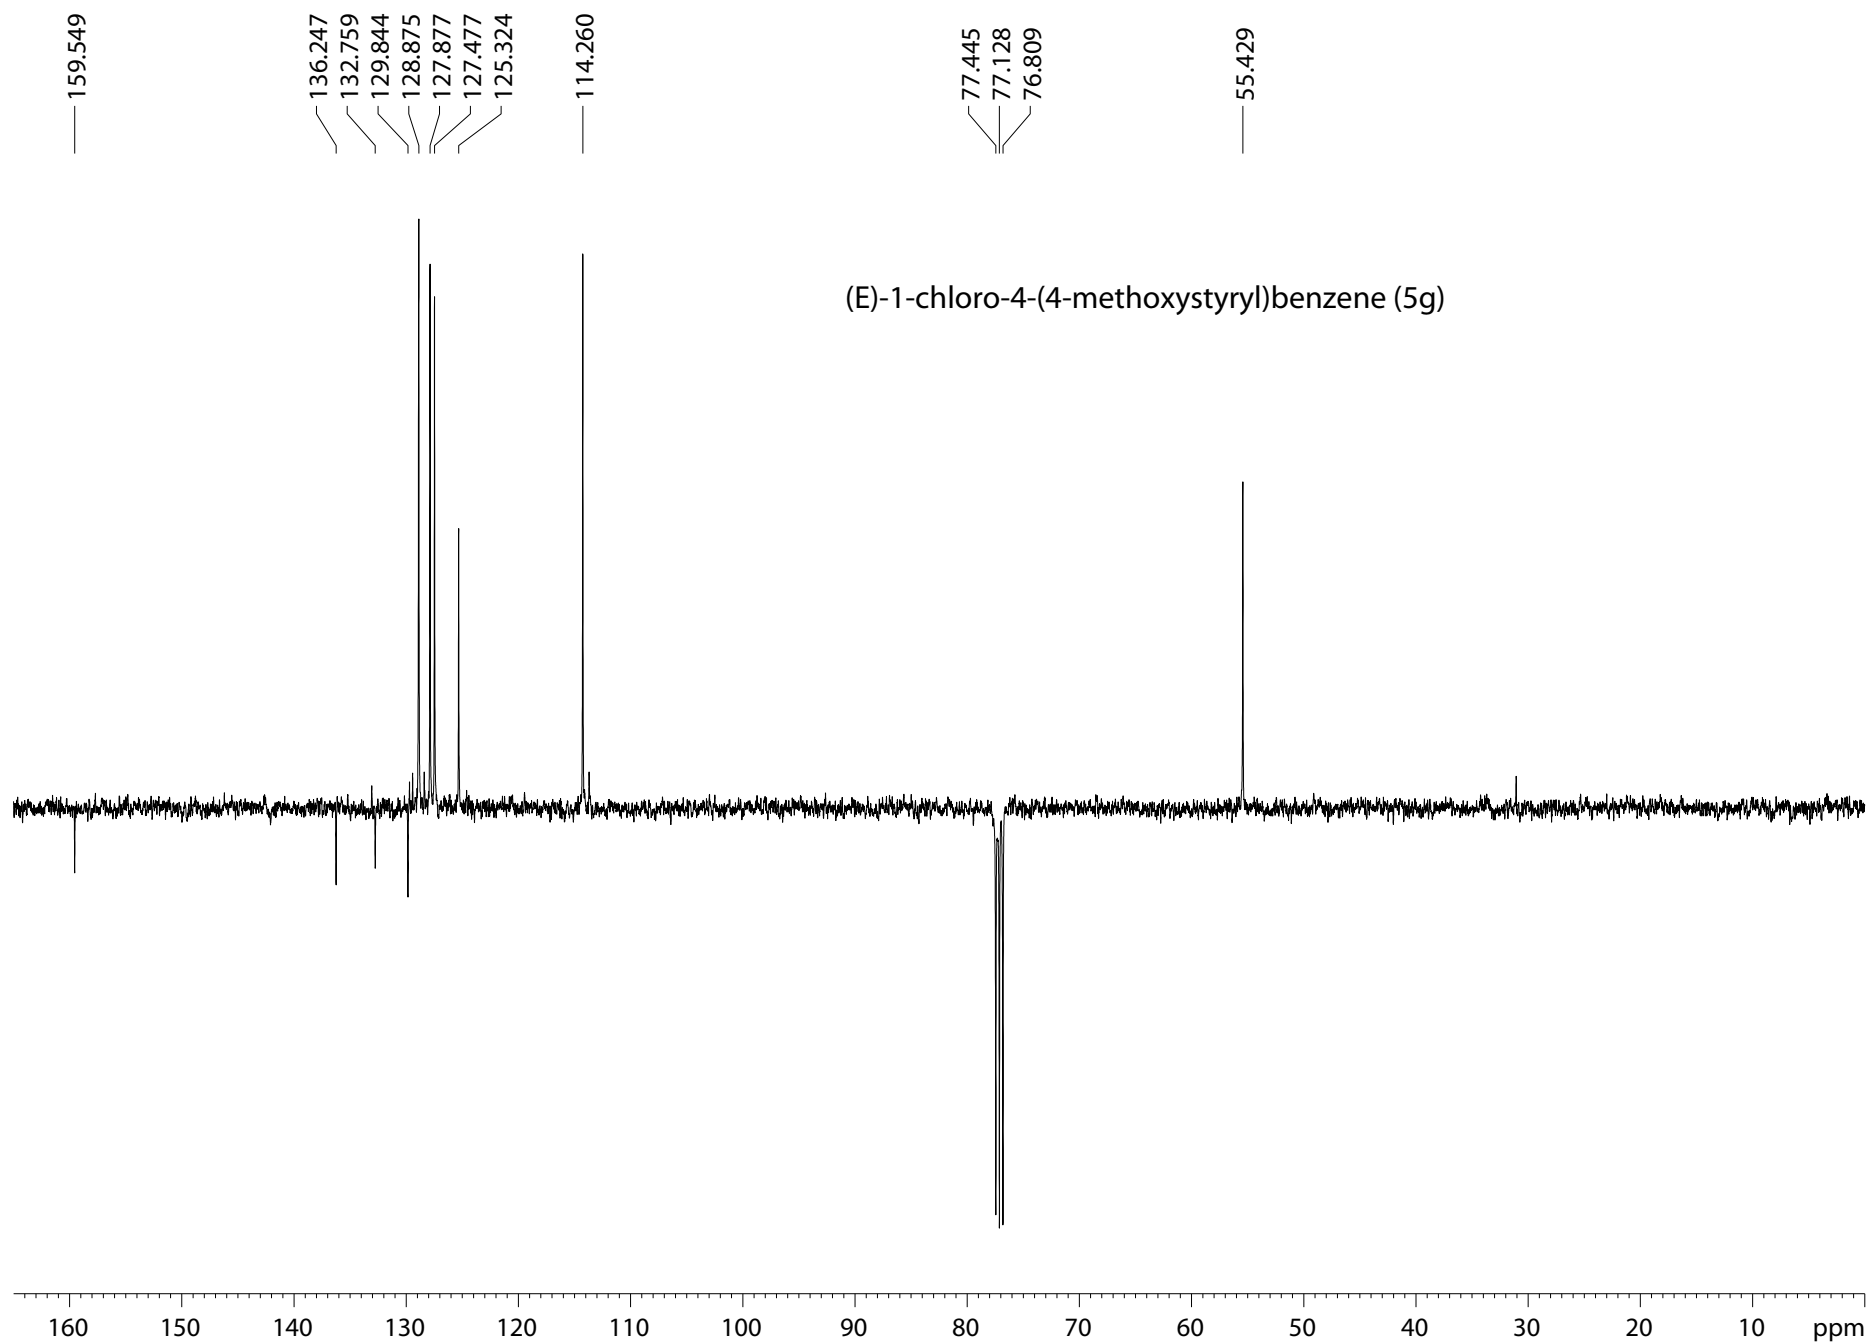



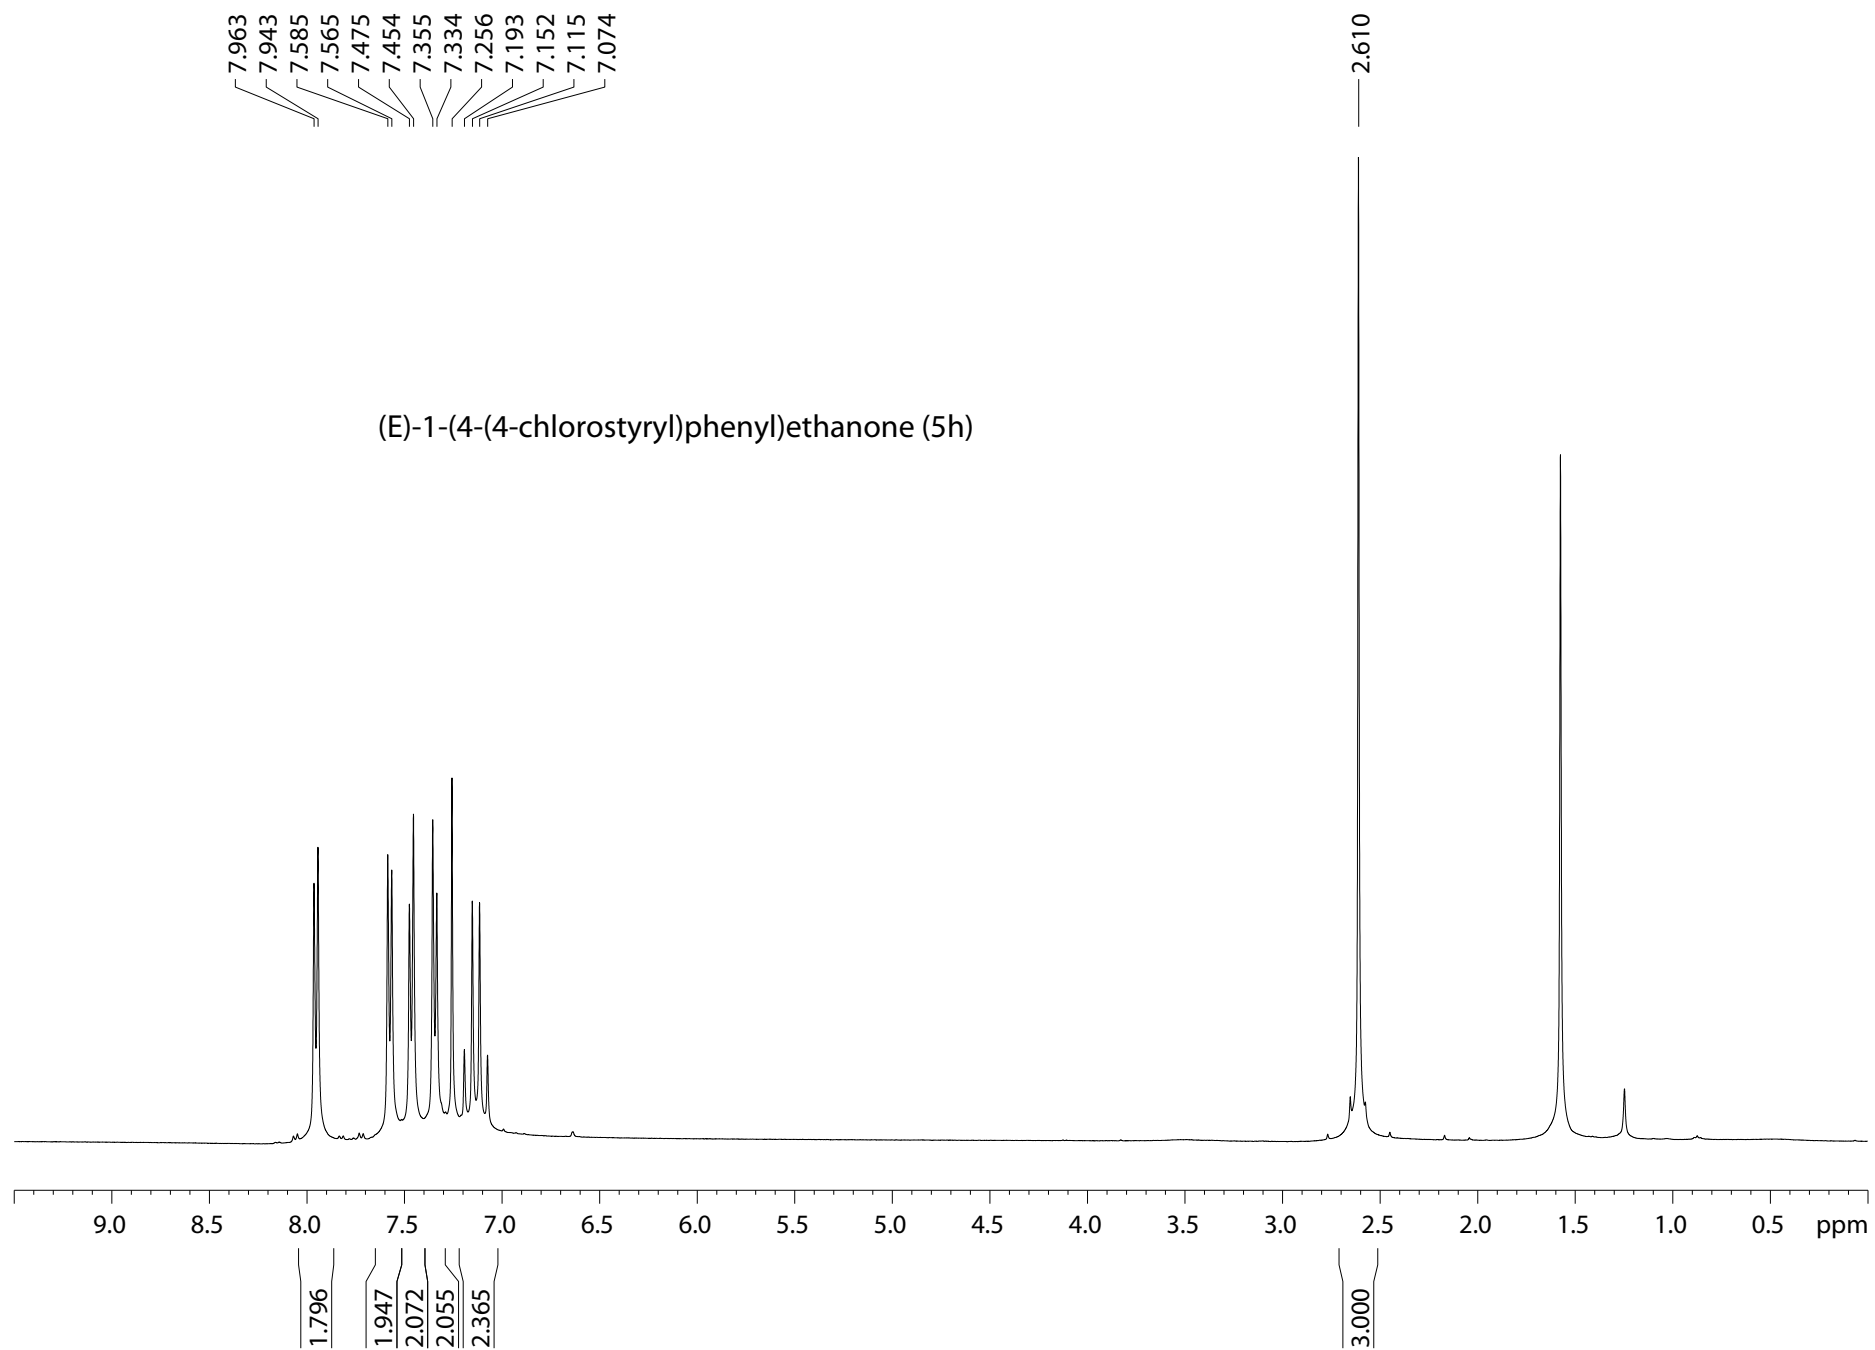

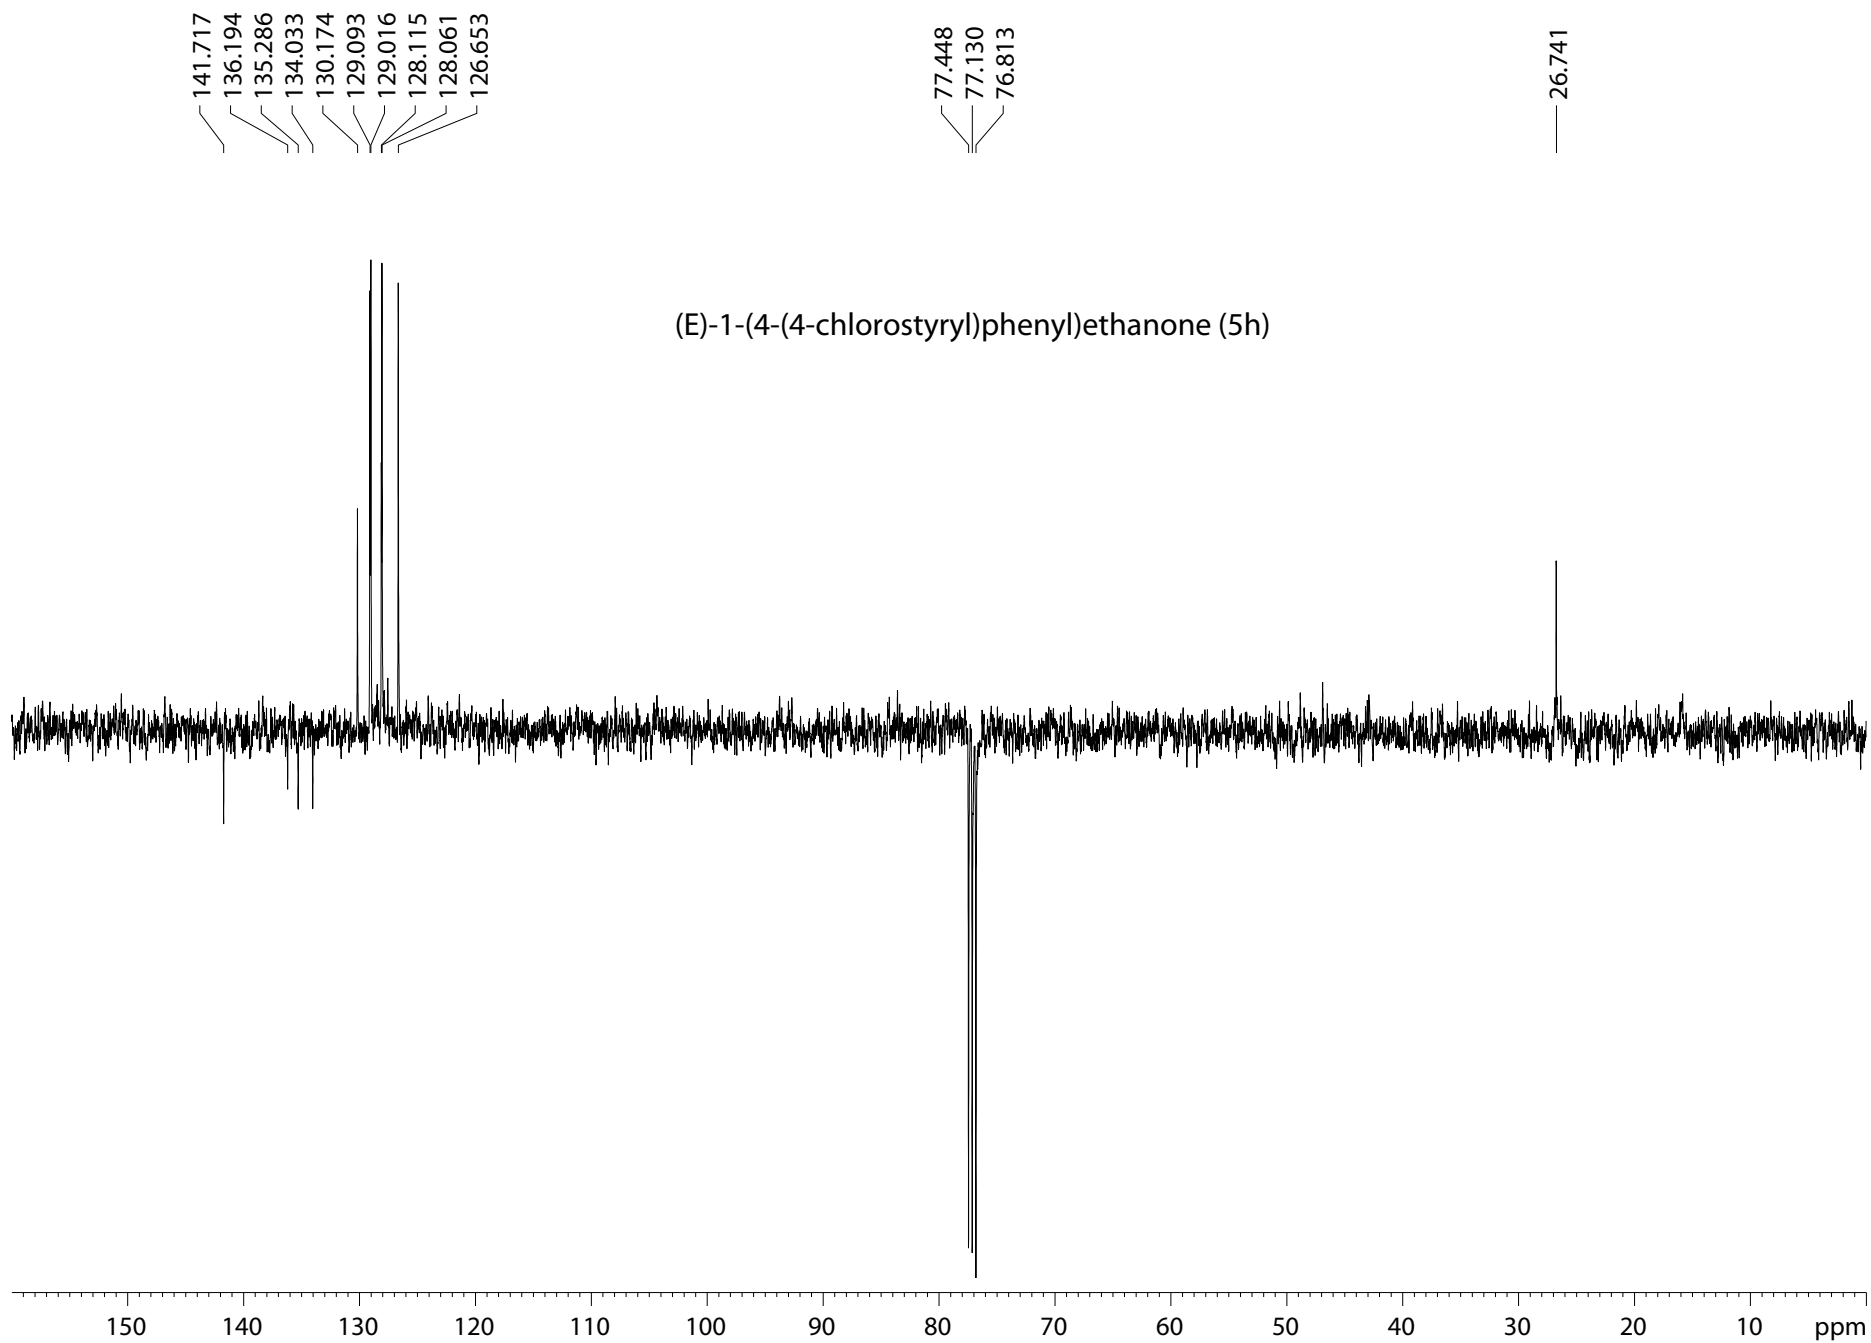

Supplement: c4gc01677g1.pdf [file c4gc01677g1.pdf]
